# Supplementary material for: Radiomic Features Are Superior to Conventional Quantitative Computed Tomographic Metrics to Identify Coronary Plaques With Napkin-Ring Sign
Source: PubMed Central journal article supplement — Circ Cardiovasc Imaging. 2017 Dec 12;10(12):e006843. doi: 10.1161/CIRCIMAGING.117.006843 (PMC5753832; doi:10.1161/circimaging.117.006843), 2017-12-12
Supplement: hci-10-e006843-s001.pdf [file hci-10-e006843-s001.pdf]

# SUPPLEMENTAL MATERIAL

## Supplemental Methods 1

### *Image quality measurements*

To assess image quality, we measured the signal-to-noise ratio defined as the mean coronary luminal CT attenuation in Hounsfield units (HU) adjacent to the plaque in a healthy segment divided by the standard deviation of the CT attenuation in the aorta measured in a region of interest at least 2 cm<sup>2</sup> at the level of the left main trunk. Contrast-to-noise ratio was calculated as the mean luminal HU minus the perivascular HU at the site of the plaque divided by the standard deviation of the aortic HU. All measurements were performed on a clinical workstation (IntelliSpace portal, Philips Healthcare, Best, The Netherlands). Detailed information regarding image quality can be found in *table 2*.

### *Image acquisition*

Images were acquired using 256-slice scanner (Brilliance iCT 256, Philips Healthcare, Best, The Netherlands) with prospective ECG-triggered acquisition mode. If the initial heart rate was above 65 beats per minutes we administered heart rate lowering medication (beta blocker or ivabradine, if beta blocker was contraindicated) orally and intravenous to the patients. To ensure optimal visualization of the coronary vessels 0.8 mg of sublingual nitroglycerin was given to all patients 2 minutes before the image acquisition. Images were acquired in cranio-caudal direction during a single breath-hold in inspiration. Four-phasic injection protocol with 90-100 ml of Iomeprol contrast agent was used (Iomeron 400, Bracco Ltd, Milan, Italy) for the coronary CTA examinations.<sup>1</sup> Examinations were performed using 128×0.625 mm detector collimation, 270 ms gantry rotation time, 120 kV, mAs 250-300 depending on patient's body mass index and chest size. All images were reconstructed to a 512×512 matrix with a slice thickness of 0.8 mm and 0.4 mm spacing between slices using an iterative image reconstruction algorithm (iDOSE<sup>4</sup> level 5, Philips Healthcare, Best, The Netherlands).

### *Calculation of radiomic features*

Using Radiomics Image Analysis (RIA) software package, we calculated 44 first-order statistics, 3585 gray level co-occurrence matrix (GLCM) based parameters, 55 gray level run length matrix (GLRLM) based metrics and 756 geometry based statistics. For first-order statistics 3D arrays containing the HU values were transformed to a 1D vector, from which the statistics were calculated. For GLCM, GLRLM and geometry based analysis images were discretized by dividing the voxel values into 2, 4, 8, 16 and 32 equally probable bins each containing the same number of voxels. This resulted in 5 replicas of the images. The different bin sizes significantly affect the calculated radiomic feature values. Fewer bins mean more robust values, however result in information loss, while more bins are susceptible to noise, but preserve more information.<sup>2</sup> We conducted our analysis hypothesis free, in a data driven manner by calculating statistics for each discretized image.

GLCM calculations were done based on the concept proposed by Halarick et al.<sup>3</sup> GLCM are matrices, where the element in the  $i^{th}$  row and  $j^{th}$  column represents the probability of finding a voxel with value  $j$  next to a voxel of value  $i$  in a given direction and distance. Each statistic was calculated for each of the 26 possible directions in 3D space and then averaged to receive rotationally independent measures. All statistics were calculated for distances 1, 2 and 3 voxels.

GLRLM calculations were done as proposed by Galloway.<sup>4</sup> In the GLRLM matrix the element in the  $i^{th}$  row and  $j^{th}$  column represents how many times  $i$  value voxels occur next to each other  $j$  times in a given direction. Each statistic was calculated for each possible run direction in 3D space and then averaged to obtain rotationally independent measures.

Geometry-based statistics were done on raw data as well as discretized images. Surfaces, volumes and radiomic parameters were calculated from the dimensions of the raw image, where the voxels in-plane dimensions were equal to pixel spacing, while the cross-plane dimension was equal to the spacing between the slices. Fractal dimensions were calculated by padding the lesion into an isovolumetric cube with sides equal to the next greatest power of two of the longest dimension of the lesion. Consecutively smaller and smaller cubes were used to cover the lesion and calculate the given statistic. Detailed description of statistical parameters can be found in *supplemental methods 2*.

## Supplemental Methods 2

### Radiomic features calculated using Radiomics Image Analysis (RIA)

#### Toolbox for Grayscale Images

##### First-order statistics

First-order statistics discard all spatial information and analyze the data points only considering their values.

For all proceeding first-order statistics let:

$x$ : ordered data points from smallest to largest

$x_i$ :  $i^{\text{th}}$  data point, indexing starts from 1

$n$ : number of elements in  $x$

Statistics describing the average and spread of the data

MEAN

$$\frac{1}{n} \sum_{i=1}^n x_i$$

MEDIAN

$$\begin{cases} x_{\text{ceil}(\frac{n}{2})} & x : \text{odd} \\ \frac{x_{\frac{n}{2}} + x_{\frac{n}{2}+1}}{2} & x : \text{even} \end{cases}$$

MODE

*Most frequent value in a data set*

HARMONIC MEAN

For all cases if  $x_i = 0$ , then  $x_i = I$ .

$$\frac{1}{\frac{1}{n} \sum_{i=1}^n \frac{1}{x_i}}$$

GEOMETRIC MEAN 1

Since the geometric mean of data sets containing negative numbers is not trivial, different geometric means have been proposed. For all cases if  $x_i = 0$ , then  $x_i = I$ .

$$\exp(\text{mean}(\log_2 |x|))$$

### GEOMETRIC MEAN 2

$$\exp(\text{mean}(\frac{x}{|x|} \log_2 |x|))$$

### GEOMETRIC MEAN 3

$$\exp(\text{mean}(\log_2(x + \min(x) + 1)))$$

### TRIMMED MEAN

If  $d = 50\%$ , then the trimmed mean is also called interquartile mean

$$\text{mean}(y) \mid y \in [x_{\frac{d}{2}\%}, x_{100-\frac{d}{2}\%}], d = \% \text{ to discard}$$

### TRIMEAN

$$\frac{x_{25\%} + 2 * x_{50\%} + x_{75\%}}{4}$$

### MEAN ABSOLUTE DEVIATION FROM THE MEDIAN

$$\text{mean}(|x - \text{median}(x)|)$$

### MEDIAN ABSOLUTE DEVIATION FROM THE MEDIAN

$$\text{median}(|x - \text{median}(x)|)$$

### MEAN ABSOLUTE DEVIATION FROM THE MEAN

$$\text{mean}(|x - \text{mean}(x)|)$$

### MEDIAN ABSOLUTE DEVIATION FROM THE MEAN

$$\text{median}(|x - \text{mean}(x)|)$$

### MEDIAN ABSOLUTE DEVIATION (MAD)

$$\text{median}(|x - \text{median}(x)|) * 1.4826$$

### MAXIMUM ABSOLUTE DEVIATION FROM THE MEDIAN

$$\text{max}(|x - \text{median}(x)|)$$

### MAXIMUM ABSOLUTE DEVIATION FROM THE MEAN

$$\text{max}(|x - \text{mean}(x)|)$$

### ROOT MEAN SQUARE (RMS)

$$\sqrt{\frac{1}{n} \sum_{i=1}^n x_i^2}$$

### MINIMUM

*Lowest value in a data set*

### MAXIMUM

*Highest value in a data set*

### QUARTILES

$$x_{25\%}, x_{75\%},$$

### INTERQUARTILE RANGE (IQR)

$$\text{abs}(x_{75\%} - x_{25\%})$$

### LOWER-NOTCH

$$x_{25\%} - 1.5 * IQR$$

## UPPER-NOTCH

$$x_{75\%} + 1.5 * IQR$$

## DECILES

$$x_{10\%}, x_{30\%}, x_{30\%}, x_{40\%}, x_{50\%}, x_{60\%}, x_{70\%}, x_{80\%}, x_{90\%}$$

## RANGE

$$abs(max(x) - min(x))$$

Statistics describing the shape of the distribution of data points

## VARIANCE

$$\frac{1}{n} \sum_{i=1}^n (x_i - mean(x))^2$$

## SKEWNESS

$$\frac{\frac{1}{n} \sum_{i=1}^n (x_i - mean(x))^3}{SD(x)^3}$$

## STANDARD DEVIATION (SD)

$$\sqrt{\frac{1}{n} \sum_{i=1}^n (x_i - mean(x))^2}$$

## KURTOSIS

$$\frac{\frac{1}{n} \sum_{i=1}^n (x_i - mean(x))^4}{SD(x)^4} - 3$$

Statistics describing the diversity of the data points

## ENERGY

$$\sum_{i=1}^n x_i^2$$

## ENTROPY

$$\sum_{i=1}^n -p(x_i) \log_2 p(x_i)$$

## UNIFORMITY

$$\sum_{i=1}^n p(x_i)^2$$

## Gray level co-occurrence matrices (GLCM)

Many statistics calculated from GLCMs are a function ( $f$ ) of the elements in the GLCM ( $g_{lcm}$ ) matrix multiplied by a weighing matrix ( $w$ ). Using mathematical notation, we can write:

$$w * f(g_{lcm})$$

These modified values are then summed to receive the statistic. By choosing different weights and functions, we can emphasize specific elements of the  $g_{lcm}$  over others, depending on what attribute of heterogeneity we wish to highlight. Basic concepts which help to understand the information stored in the  $g_{lcm}$  are:

- $g_{lcm}[i,j]$ : the probability of a value  $j$  occurring next to value  $i$  at a given angle and direction.
- The main diagonal elements of the  $g_{lcm}$  store the probabilities of identical voxel occurring next to each other at given distance and direction.
- The further away we move perpendicular to the main diagonal we receive probabilities of voxel occurring next to each other with increasingly different values.
- The upper left quadrant of the matrix holds probabilities of low attenuations voxels occurring next to each other.
- The lower left and the upper right quadrant of the matrix hold probabilities of low attenuations voxels occurring next to high attenuation voxels.
- The lower right quadrant of the matrix holds probabilities of high attenuations voxels occurring next to each other.

For all proceeding  $g_{lcm}$  statistics let:

$g$ : the number of gray levels the image has been discretized into

$g_l$ : the values of the discretized gray levels, usually  $g_l = [1, g]$

$g_{lcm}$ : the gray level co-occurrence matrices matrix, with  $g$  number of rows and columns

$f$ : function of the elements in the  $g_{lcm}$

$w$ : the weighing matrix, with  $g$  number of rows and columns

$i$ : the  $i^{\text{th}}$  row

$j$ : the  $j^{\text{th}}$  row

For all calculated statistics the following functions of the  $g_{lcm}$  are considered:

$f(x)=x$ :  $g_{lcm}$  is unchanged

$f(x)=x^2$ : all elements of the *glcm* are squared

$f(x)=-x\log_2(x)$ : elements of the *glcm* are replaced by entropy

The following *glcm* matrix is used for calculations:

$$glcm = \begin{bmatrix} 0.14 & 0.07 & 0.03 & 0.01 \\ 0.07 & 0.08 & 0.06 & 0.04 \\ 0.03 & 0.06 & 0.06 & 0.06 \\ 0.01 & 0.04 & 0.06 & 0.18 \end{bmatrix}$$

For all statistics, the *w* matrix is given.

## CONTRAST

$$w_{ij} = (i - j)^2 \quad w = \begin{bmatrix} 0 & 1 & 4 & 9 \\ 1 & 0 & 1 & 4 \\ 4 & 1 & 0 & 1 \\ 9 & 4 & 1 & 0 \end{bmatrix}$$

*Contrast* gives higher weights in cases where the neighboring voxels have different values. The higher the *Contrast* of an image, the bigger the differences in voxel values of neighboring voxels.

## HOMOGENEITY<sup>2</sup>

$$w_{ij} = \frac{1}{(i - j)^2 + 1} \quad w = \begin{bmatrix} \frac{1}{1} & \frac{1}{2} & \frac{1}{5} & \frac{1}{10} \\ \frac{1}{2} & \frac{1}{1} & \frac{1}{2} & \frac{1}{5} \\ \frac{1}{5} & \frac{1}{2} & \frac{1}{1} & \frac{1}{2} \\ \frac{1}{10} & \frac{1}{5} & \frac{1}{2} & \frac{1}{1} \end{bmatrix}$$

*Homogeneity<sup>2</sup>* is the counterpart of *Contrast*. It takes the same weights, but takes the reciprocal value of them. Therefore, higher weights are given to elements close to the main diagonal, which decreases perpendicular to the main diagonal. The higher the *Homogeneity<sup>2</sup>* of an image, the more similar voxels are next to each other.

## HOMOGENEITY<sup>2</sup> NON-DIAGONAL

$$w_{ij} = \frac{1}{(i - j)^2 + 1} \quad w = \begin{bmatrix} 0.0 & 0.5 & 0.2 & 0.1 \\ 0.5 & 0.0 & 0.5 & 0.2 \\ 0.2 & 0.5 & 0.0 & 0.5 \\ 0.1 & 0.2 & 0.5 & 0.0 \end{bmatrix}$$

*Homogeneity<sup>2</sup> non-diagonal* is similar to *Homogeneity<sup>2</sup>* except that the diagonal

elements of  $w$  are 0, therefore same value voxel pairs are not considered in the statistic.

## DISSIMILARITY

$$w_{ij} = |i - j| \quad w = \begin{bmatrix} 0 & 1 & 2 & 3 \\ 1 & 0 & 1 & 2 \\ 2 & 1 & 0 & 1 \\ 3 & 2 & 1 & 0 \end{bmatrix}$$

*Dissimilarity* gives higher weights in cases where the neighboring voxels have different values. It differs from *Contrast*, in that the weights grow linearly perpendicular to the main diagonal, as opposed to *Contrast*, where the weights grow as a quadratic function.

## HOMOGENEITY

$$w_{ij} = \frac{1}{|i - j| + 1} \quad w = \begin{bmatrix} \frac{1}{1} & \frac{1}{2} & \frac{1}{3} & \frac{1}{4} \\ \frac{1}{2} & \frac{1}{1} & \frac{1}{2} & \frac{1}{3} \\ \frac{1}{3} & \frac{1}{2} & \frac{1}{1} & \frac{1}{2} \\ \frac{1}{4} & \frac{1}{3} & \frac{1}{2} & \frac{1}{1} \end{bmatrix}$$

*Homogeneity* is the counterpart of *Dissimilarity*. It takes the same weights, but takes the reciprocal value of them. Therefore, higher weights are given to elements close to the main diagonal, which decreases perpendicular to the main diagonal. It differs from *Homogeneity<sup>2</sup>*, in that the weights decrease linearly perpendicular to the main diagonal, as opposed to *Contrast*, where the weights decrease as a quadratic function.



## HOMOGENEITY NON-DIAGONAL

$$w_{ij} = \frac{1}{|i-j|+1} \quad w = \begin{bmatrix} 0.00 & 0.50 & 0.33 & 0.25 \\ 0.50 & 0.00 & 0.50 & 0.33 \\ 0.33 & 0.50 & 0.00 & 0.50 \\ 0.25 & 0.33 & 0.50 & 0.00 \end{bmatrix}$$

*Homogeneity non-diagonal* is similar to *Homogeneity* except that the diagonal elements of  $w$  are 0, therefore same value voxel pairs are not considered in the statistic.

## DIFFERENCE MOMENTUM NORMALIZED (DMN)

$$w_{ij} = \frac{(i-j)^2}{g^2} \quad w = \begin{bmatrix} 0.00 & 0.06 & 0.25 & 0.56 \\ 0.06 & 0.00 & 0.06 & 0.25 \\ 0.25 & 0.06 & 0.00 & 0.06 \\ 0.56 & 0.25 & 0.06 & 0.00 \end{bmatrix}$$

*DMN* is very similar to *Contrast*, except in that it normalizes the weights by the square of the number of gray levels in the image. This results in different weights, where they increase at a slower rate further away from the main diagonal, as compared to *Contrast*.

## INVERSE DIFFERENCE MOMENTUM NORMALIZED (IDMN)

$$w_{ij} = \frac{1}{\frac{(i-j)^2}{g^2} + 1} \quad w = \begin{bmatrix} 1.00 & 0.94 & 0.80 & 0.64 \\ 0.94 & 1.00 & 0.94 & 0.80 \\ 0.80 & 0.94 & 1.00 & 0.94 \\ 0.64 & 0.80 & 0.94 & 1.00 \end{bmatrix}$$

*IDMN* is very similar to *Homogeneity*<sup>2</sup>, except in that it normalizes the weights by square of the number of gray levels in the image. This results in different weights, where they decline at a slower rate further

away from the main diagonal, as compared to *Homogeneity*<sup>2</sup>.

## IDMN NON-DIAGONAL

$$w_{ij} = \frac{1}{\frac{(i-j)^2}{g^2} + 1} \quad w = \begin{bmatrix} 0.00 & 0.94 & 0.80 & 0.64 \\ 0.94 & 0.00 & 0.94 & 0.80 \\ 0.80 & 0.94 & 0.00 & 0.94 \\ 0.64 & 0.80 & 0.94 & 0.00 \end{bmatrix}$$

*IDMN non diagonal* is very similar to *IDMN* except that the diagonal elements of  $w$  are 0, therefore same value voxel pairs are not considered in the statistic.

## DIFFERENCE NORMALIZED (DN)

$$w_{ij} = \frac{|i-j|}{g} \quad w = \begin{bmatrix} 0.00 & 0.25 & 0.50 & 0.75 \\ 0.25 & 0.00 & 0.25 & 0.50 \\ 0.50 & 0.25 & 0.00 & 0.25 \\ 0.75 & 0.50 & 0.25 & 0.00 \end{bmatrix}$$

*DN* is very similar to *Dissimilarity*, except in that it normalizes the weights by the number of gray levels in the image. This results in different weights, where they increase at a slower rate further away from the main diagonal, as compared to *Dissimilarity*.

## INVERSE DIFFERENCE NORMALIZED (IDN)

$$w_{ij} = \frac{1}{\frac{|i-j|}{g} + 1} \quad w = \begin{bmatrix} 1.00 & 0.80 & 0.67 & 0.57 \\ 0.80 & 1.00 & 0.80 & 0.67 \\ 0.67 & 0.80 & 1.00 & 0.80 \\ 0.57 & 0.67 & 0.80 & 1.00 \end{bmatrix}$$

*IDN* is very similar to *Homogeneity*, except in that it normalizes the weights by the number of gray levels in the image. This

results in different weights, where they decline at a slower rate further away from the main diagonal, as compared to *Homogeneity*.

#### INVERSE DIFFERENCE NORMALIZED (IDN) NON-DIAGONAL

$$w_{ij} = \frac{1}{\frac{|i-j|}{g} + 1} \quad w = \begin{bmatrix} 0.00 & 0.80 & 0.67 & 0.57 \\ 0.80 & 0.00 & 0.80 & 0.67 \\ 0.67 & 0.80 & 0.00 & 0.80 \\ 0.57 & 0.67 & 0.80 & 0.00 \end{bmatrix}$$

*IDN non-diagonal* is very similar to *IDN* except that the diagonal elements of  $w$  are 0, therefore same value voxel pairs are not considered in the statistic.

#### AUTOCORRELATION

$$w_{ij} = ij \quad w = \begin{bmatrix} 1 & 2 & 3 & 4 \\ 2 & 4 & 6 & 8 \\ 3 & 6 & 9 & 12 \\ 4 & 8 & 12 & 16 \end{bmatrix}$$

*Autocorrelation* uses weights which increase in the direction of the lower right quadrant, therefore emphasizing the lower right quadrant of the *glcm*, where we have the probabilities of high intensity value voxels occurring next to similarly high value voxels.

#### AUTOCORRELATION NON-DIAGONAL

$$w_{ij} = ij \quad w = \begin{bmatrix} 0 & 2 & 3 & 4 \\ 2 & 0 & 6 & 8 \\ 3 & 6 & 0 & 12 \\ 4 & 8 & 12 & 0 \end{bmatrix}$$

*Autocorrelation non-diagonal* is very similar to *Autocorrelation* except that the diagonal

elements of  $w$  are 0, therefore same value voxel pairs are not considered in the statistic.

#### INVERSE AUTOCORRELATION

$$w_{ij} = \frac{1}{ij} \quad w = \begin{bmatrix} \frac{1}{1} & \frac{1}{2} & \frac{1}{3} & \frac{1}{4} \\ \frac{1}{2} & \frac{1}{4} & \frac{1}{6} & \frac{1}{8} \\ \frac{1}{3} & \frac{1}{6} & \frac{1}{9} & \frac{1}{12} \\ \frac{1}{4} & \frac{1}{8} & \frac{1}{12} & \frac{1}{16} \end{bmatrix}$$

*Inverse autocorrelation* is the counterpart of *autocorrelation*, it uses weights which are the reciprocal value of the *autocorrelation* weights and thus increase in the direction of the upper left quadrant, therefore emphasizing the upper left quadrant of the *glcm*, where we have the probabilities of low intensity value voxels occurring next to similarly low value voxels.

#### INVERSE AUTOCORRELATION NON-DIAGONAL

$$w_{ij} = \frac{1}{ij} \quad w = \begin{bmatrix} 0.00 & 0.50 & 0.33 & 0.25 \\ 0.50 & 0.00 & 0.17 & 0.12 \\ 0.33 & 0.17 & 0.00 & 0.08 \\ 0.25 & 0.12 & 0.08 & 0.00 \end{bmatrix}$$

*Inverse autocorrelation non-diagonal* is very similar to *Inverse autocorrelation* except that the diagonal elements of  $w$  are 0, therefore same value voxel pairs are not considered in the statistic.

## GAUSSIAN

$$w_{ij} = \exp\left(-\frac{1}{2\sigma^2}(i - \mu)^2\right) * \exp\left(-\frac{1}{2\sigma^2}(j - \mu)^2\right)$$

$$\mu = \text{mean}([1, g]) \quad \sigma = \text{sd}([1, g])$$

$$w = \begin{bmatrix} 0.26 & 0.47 & 0.47 & 0.26 \\ 0.47 & 0.86 & 0.86 & 0.47 \\ 0.47 & 0.86 & 0.86 & 0.47 \\ 0.26 & 0.47 & 0.47 & 0.26 \end{bmatrix}$$

*Gaussian* uses a 2 dimensional Gaussian distribution as weights. Elements in the middle of the *glcm* which represent voxels with intermediate values next to each other receive the highest weights. The degree of the weights decreases in all directions exponentially.

## GAUSSIAN NON-DIAGONAL

$$w_{ij} = \exp\left(-\frac{1}{2\sigma^2}(i - \mu)^2\right) * \exp\left(-\frac{1}{2\sigma^2}(j - \mu)^2\right)$$

$$\mu = \text{mean}([1, g]) \quad \sigma = \text{sd}([1, g])$$

$$w = \begin{bmatrix} 0.00 & 0.47 & 0.47 & 0.26 \\ 0.47 & 0.00 & 0.86 & 0.47 \\ 0.47 & 0.86 & 0.00 & 0.47 \\ 0.26 & 0.47 & 0.47 & 0.00 \end{bmatrix}$$

*Gaussian non-diagonal* is very similar to *Gaussian* except that the diagonal elements of  $w$  are 0, therefore same value voxel pairs are not considered in the statistic.

## INVERSE GAUSSIAN

$$w_{ij} = \frac{1}{\exp\left(-\frac{1}{2\sigma^2}(i - \mu)^2\right) * \exp\left(-\frac{1}{2\sigma^2}(j - \mu)^2\right)}$$

$$\mu = \text{mean}([1, g]) \quad \sigma = \text{sd}([1, g])$$

$$w = \begin{bmatrix} 3.86 & 2.12 & 2.12 & 3.86 \\ 2.12 & 1.16 & 1.16 & 2.12 \\ 2.12 & 1.16 & 1.16 & 2.12 \\ 3.86 & 2.12 & 2.12 & 3.86 \end{bmatrix}$$

*Inverse Gaussian* uses the reciprocal values of a 2 dimensional Gaussian distribution as weights. Elements in the middle of the *glcm* which represent voxels with intermediate values next to each other receive the smallest weights. The degree of the weights increases in all directions exponentially, therefore elements in the four corners of the *glcm* receive higher weights as compared to the center.

## INVERSE GAUSSIAN NON-DIAGONAL

$$w_{ij} = \frac{1}{\exp\left(-\frac{1}{2\sigma^2}(i - \mu)^2\right) * \exp\left(-\frac{1}{2\sigma^2}(j - \mu)^2\right)}$$

$$\mu = \text{mean}([1, g]) \quad \sigma = \text{sd}([1, g])$$

$$w = \begin{bmatrix} 0.00 & 2.12 & 2.12 & 3.86 \\ 2.12 & 0.00 & 1.16 & 2.12 \\ 2.12 & 1.16 & 0.00 & 2.12 \\ 3.86 & 2.12 & 2.12 & 0.00 \end{bmatrix}$$

*Inverse Gaussian non-diagonal* is very similar to *Inverse Gaussian* except that the diagonal elements of  $w$  are 0, therefore same value voxel pairs are not considered in the statistic.

## GAUSSIAN LEFT POLAR

$$w_{ij} = \exp\left(-\frac{1}{2\sigma^2}(i - \mu)^2\right) * \exp\left(-\frac{1}{2\sigma^2}(j - \mu)^2\right)$$

$$\mu = \text{mean}([1, g]) \quad \sigma = \text{sd}([1, g])$$

$$w = \begin{bmatrix} 1.00 & 0.74 & 0.30 & 0.07 \\ 0.74 & 0.55 & 0.22 & 0.05 \\ 0.30 & 0.22 & 0.09 & 0.02 \\ 0.07 & 0.05 & 0.02 & 0.00 \end{bmatrix}$$

*Gaussian left polar* uses a 2 dimensional Gaussian distribution as weights similar to

the simple *Gaussian*, except that the center of the distribution is in the top left of the  $w$  matrix, therefore the probability of low value voxels occurring next to each other is emphasized.

### GAUSSIAN LEFT POLAR NON-DIAGONAL

$$w_{ij} = \exp\left(-\frac{1}{2\sigma^2}(i - \mu)^2\right) * \exp\left(-\frac{1}{2\sigma^2}(j - \mu)^2\right)$$

$$\mu = \text{mean}([1, g]) \quad \sigma = \text{sd}([1, g])$$

$$w = \begin{bmatrix} 0.00 & 0.74 & 0.30 & 0.07 \\ 0.74 & 0.00 & 0.22 & 0.05 \\ 0.30 & 0.22 & 0.00 & 0.02 \\ 0.07 & 0.05 & 0.02 & 0.00 \end{bmatrix}$$

*Gaussian left polar non-diagonal* is very similar to the *Gaussian left polar* except that the diagonal elements of  $w$  are 0, therefore same value voxel pairs are not considered in the statistic.

### INVERSE GAUSSIAN LEFT POLAR

$$w_{ij} = \frac{1}{\exp\left(-\frac{1}{2\sigma^2}(i - \mu)^2\right) * \exp\left(-\frac{1}{2\sigma^2}(j - \mu)^2\right)}$$

$$\mu = \text{mean}([1, g]) \quad \sigma = \text{sd}([1, g])$$

$$w = \begin{bmatrix} 1.00 & 1.35 & 3.32 & 14.88 \\ 1.35 & 1.82 & 4.48 & 20.09 \\ 3.32 & 4.48 & 11.02 & 49.40 \\ 14.88 & 20.09 & 49.40 & 221.41 \end{bmatrix}$$

*Inverse Gaussian left polar* uses the reciprocal values of a 2 dimensional Gaussian distribution as weights. It is very similar to the *Inverse Gaussian*, except that the center of the distribution is in the top left, therefore elements in the top left of the  $w$  matrix

which represent voxels with low values next to each other receive the smallest weights.

### INVERSE GAUSSIAN LEFT POLAR NON-DIAGONAL

$$w_{ij} = \frac{1}{\exp\left(-\frac{1}{2\sigma^2}(i - \mu)^2\right) * \exp\left(-\frac{1}{2\sigma^2}(j - \mu)^2\right)}$$

$$\mu = \text{mean}([1, g]) \quad \sigma = \text{sd}([1, g])$$

$$w = \begin{bmatrix} 0.00 & 1.35 & 3.32 & 14.88 \\ 1.35 & 0.00 & 4.48 & 20.09 \\ 3.32 & 4.48 & 0.00 & 49.40 \\ 14.88 & 20.09 & 49.40 & 0.00 \end{bmatrix}$$

*Inverse Gaussian left polar non-diagonal* is very similar to *Inverse Gaussian left polar* except that the diagonal elements of  $w$  are 0, therefore same value voxel pairs are not considered in the statistic.

### GAUSSIAN LEFT FOCUS

$$w_{ij} = \exp\left(-\frac{1}{2\sigma^2}(i - \mu)^2\right) * \exp\left(-\frac{1}{2\sigma^2}(j - \mu)^2\right)$$

$$\mu = \text{mean}([1, g]) \quad \sigma = \text{sd}([1, g])$$

$$w = \begin{bmatrix} 0.86 & 0.86 & 0.47 & 0.14 \\ 0.86 & 0.86 & 0.47 & 0.14 \\ 0.47 & 0.47 & 0.26 & 0.08 \\ 0.14 & 0.14 & 0.08 & 0.02 \end{bmatrix}$$

*Gaussian left focus* uses a 2 dimensional Gaussian distribution as weights similar to the simple *Gaussian*, except that the center of the distribution is in the middle of the upper left quadrant of the  $w$  matrix, therefore the probability of low-intermediate value voxels occurring next to each other is emphasized.

### GAUSSIAN LEFT FOCUS NON-DIAGONAL

$$w_{ij} = \exp\left(-\frac{1}{2\sigma^2}(i - \mu)^2\right) * \exp\left(-\frac{1}{2\sigma^2}(j - \mu)^2\right)$$

$$\mu = \text{mean}([1, g]) \quad \sigma = \text{sd}([1, g])$$

$$w = \begin{bmatrix} 0.00 & 0.86 & 0.47 & 0.14 \\ 0.86 & 0.00 & 0.47 & 0.14 \\ 0.47 & 0.47 & 0.00 & 0.08 \\ 0.14 & 0.14 & 0.08 & 0.00 \end{bmatrix}$$

*Gaussian left focus non-diagonal* is very similar to the *Gaussian left focus* except that the diagonal elements of  $w$  are 0, therefore same value voxel pairs are not considered in the statistic.

### INVERSE GAUSSIAN LEFT FOCUS

$$w_{ij} = \frac{1}{\exp\left(-\frac{1}{2\sigma^2}(i - \mu)^2\right) * \exp\left(-\frac{1}{2\sigma^2}(j - \mu)^2\right)}$$

$$\mu = \text{mean}([1, g]) \quad \sigma = \text{sd}([1, g])$$

$$w = \begin{bmatrix} 1.16 & 1.16 & 2.12 & 7.03 \\ 1.16 & 1.16 & 2.12 & 7.03 \\ 2.12 & 2.12 & 3.86 & 12.81 \\ 7.03 & 7.03 & 12.81 & 42.52 \end{bmatrix}$$

*Inverse Gaussian left focus* uses the reciprocal values of a 2 dimensional Gaussian distribution as weights. It is very similar to the *Inverse Gaussian*, except that the center of the distribution is in the middle of the upper left quadrant of the  $w$  matrix, therefore elements in the upper left of the  $g_{lcm}$  which represent voxels with low-intermediate values next to each other receive the smallest weights.

### INVERSE GAUSSIAN LEFT FOCUS NON-DIAGONAL

$$w_{ij} = \frac{1}{\exp\left(-\frac{1}{2\sigma^2}(i - \mu)^2\right) * \exp\left(-\frac{1}{2\sigma^2}(j - \mu)^2\right)}$$

$$\mu = \text{mean}([1, g]) \quad \sigma = \text{sd}([1, g])$$

$$w = \begin{bmatrix} 0.00 & 1.16 & 2.12 & 7.03 \\ 1.16 & 0.00 & 2.12 & 7.03 \\ 2.12 & 2.12 & 0.00 & 12.81 \\ 7.03 & 7.03 & 12.81 & 0.00 \end{bmatrix}$$

*Inverse Gaussian left focus non-diagonal* is very similar to *Inverse Gaussian left focus* except that the diagonal elements of  $w$  are 0, therefore same value voxel pairs are not considered in the statistic.

### GAUSSIAN RIGHT FOCUS

$$w_{ij} = \exp\left(-\frac{1}{2\sigma^2}(i - \mu)^2\right) * \exp\left(-\frac{1}{2\sigma^2}(j - \mu)^2\right)$$

$$\mu = \text{mean}([1, g]) \quad \sigma = \text{sd}([1, g])$$

$$w = \begin{bmatrix} 0.02 & 0.08 & 0.14 & 0.14 \\ 0.08 & 0.26 & 0.47 & 0.47 \\ 0.14 & 0.47 & 0.86 & 0.86 \\ 0.14 & 0.47 & 0.86 & 0.86 \end{bmatrix}$$

*Gaussian right focus* uses a 2 dimensional Gaussian distribution as weights similar to the simple *Gaussian*, except that the center of the distribution is in the middle of the lower right quadrant of the  $w$  matrix, therefore the probability of intermediate-high value voxels occurring next to each other is emphasized.

### GAUSSIAN RIGHT FOCUS NON-DIAGONAL

$$w_{ij} = \exp\left(-\frac{1}{2\sigma^2}(i - \mu)^2\right) * \exp\left(-\frac{1}{2\sigma^2}(j - \mu)^2\right)$$

$$\mu = \text{mean}([1, g]) \quad \sigma = \text{sd}([1, g])$$

$$w = \begin{bmatrix} 0.00 & 0.08 & 0.14 & 0.14 \\ 0.08 & 0.00 & 0.47 & 0.47 \\ 0.14 & 0.47 & 0.00 & 0.86 \\ 0.14 & 0.47 & 0.86 & 0.00 \end{bmatrix}$$

*Gaussian right focus non-diagonal* is very similar to the *Gaussian right focus* except that the diagonal elements of  $w$  are 0, therefore same value voxel pairs are not considered in the statistic.

### INVERSE GAUSSIAN RIGHT FOCUS

$$w_{ij} = \frac{1}{\exp\left(-\frac{1}{2\sigma^2}(i - \mu)^2\right) * \exp\left(-\frac{1}{2\sigma^2}(j - \mu)^2\right)}$$

$$\mu = \text{mean}([1, g]) \quad \sigma = \text{sd}([1, g])$$

$$w = \begin{bmatrix} 42.52 & 12.81 & 7.03 & 7.03 \\ 12.81 & 3.86 & 2.12 & 2.12 \\ 7.03 & 2.12 & 1.16 & 1.16 \\ 7.03 & 2.12 & 1.16 & 1.16 \end{bmatrix}$$

*Inverse Gaussian right focus* uses the reciprocal values of a 2 dimensional Gaussian distribution as weights. It is very similar to the *Inverse Gaussian*, except that the center of the distribution is in the middle of the lower right quadrant of the  $w$  matrix, therefore elements in the lower right of the  $glcm$  which represent voxels with intermediate-high values next to each other receive the smallest weights.

### INVERSE GAUSSIAN RIGHT FOCUS NON-DIAGONAL

$$w_{ij} = \frac{1}{\exp\left(-\frac{1}{2\sigma^2}(i - \mu)^2\right) * \exp\left(-\frac{1}{2\sigma^2}(j - \mu)^2\right)}$$

$$\mu = \text{mean}([1, g]) \quad \sigma = \text{sd}([1, g])$$

$$w = \begin{bmatrix} 0.00 & 12.81 & 7.03 & 7.03 \\ 12.81 & 0.00 & 2.12 & 2.12 \\ 7.03 & 2.12 & 0.00 & 1.16 \\ 7.03 & 2.12 & 1.16 & 0.00 \end{bmatrix}$$

*Inverse Gaussian right focus non-diagonal* is very similar to *Inverse Gaussian right focus* except that the diagonal elements of  $w$  are 0, therefore same value voxel pairs are not considered in the statistic.

### GAUSSIAN RIGHT POLAR

$$w_{ij} = \exp\left(-\frac{1}{2\sigma^2}(i - \mu)^2\right) * \exp\left(-\frac{1}{2\sigma^2}(j - \mu)^2\right)$$

$$\mu = \text{mean}([1, g]) \quad \sigma = \text{sd}([1, g])$$

$$w = \begin{bmatrix} 0.00 & 0.02 & 0.05 & 0.07 \\ 0.02 & 0.09 & 0.22 & 0.30 \\ 0.05 & 0.22 & 0.55 & 0.74 \\ 0.07 & 0.30 & 0.74 & 1.00 \end{bmatrix}$$

*Gaussian right polar* uses a 2 dimensional Gaussian distribution as weights similar to the simple *Gaussian*, except that the center of the distribution is in the lower right of the  $w$  matrix, therefore the probability of high value voxels occurring next to each other is emphasized.

## GAUSSIAN RIGHT POLAR NON-DIAGONAL

$$w_{ij} = \exp\left(-\frac{1}{2\sigma^2}(i - \mu)^2\right) * \exp\left(-\frac{1}{2\sigma^2}(j - \mu)^2\right)$$

$$\mu = \text{mean}([1, g]) \quad \sigma = \text{sd}([1, g])$$

$$w = \begin{bmatrix} 0.00 & 0.02 & 0.05 & 0.07 \\ 0.02 & 0.00 & 0.22 & 0.30 \\ 0.05 & 0.22 & 0.00 & 0.74 \\ 0.07 & 0.30 & 0.74 & 0.00 \end{bmatrix}$$

*Gaussian right polar non-diagonal* is very similar to the *Gaussian right polar* except that the diagonal elements of  $w$  are 0, therefore same value voxel pairs are not considered in the statistic.

## INVERSE GAUSSIAN RIGHT POLAR

$$w_{ij} = \frac{1}{\exp\left(-\frac{1}{2\sigma^2}(i - \mu)^2\right) * \exp\left(-\frac{1}{2\sigma^2}(j - \mu)^2\right)}$$

$$\mu = \text{mean}([1, g]) \quad \sigma = \text{sd}([1, g])$$

$$w = \begin{bmatrix} 221.41 & 49.40 & 20.09 & 14.88 \\ 49.40 & 11.02 & 4.48 & 3.32 \\ 20.09 & 4.48 & 1.82 & 1.35 \\ 14.88 & 3.32 & 1.35 & 1.00 \end{bmatrix}$$

*Inverse Gaussian right polar* uses the reciprocal values of a 2 dimensional Gaussian distribution as weights. It is very similar to the *Inverse Gaussian*, except that the center of the distribution is in the lower right of the  $w$  matrix, therefore elements in the lower right of the  $glcm$  which represent voxels with high values next to each other receive the smallest weights.

## INVERSE GAUSSIAN RIGHT POLAR NON-DIAGONAL

$$w_{ij} = \frac{1}{\exp\left(-\frac{1}{2\sigma^2}(i - \mu)^2\right) * \exp\left(-\frac{1}{2\sigma^2}(j - \mu)^2\right)}$$

$$\mu = \text{mean}([1, g]) \quad \sigma = \text{sd}([1, g])$$

$$w = \begin{bmatrix} 0.00 & 49.40 & 20.09 & 14.88 \\ 49.40 & 0.00 & 4.48 & 3.32 \\ 20.09 & 4.48 & 0.00 & 1.35 \\ 14.88 & 3.32 & 1.35 & 0.00 \end{bmatrix}$$

*Inverse Gaussian right polar non-diagonal* is very similar to *Inverse Gaussian right polar* except that the diagonal elements of  $w$  are 0, therefore same value voxel pairs are not considered in the statistic.

## GAUSSIAN 2 FOCUS

$$w_{ij} = \sqrt{2\pi}\sigma\exp\left(-\frac{1}{2\sigma^2}(i - \mu_1)^2\right) * \sqrt{2\pi}\sigma\exp\left(-\frac{1}{2\sigma^2}(j - \mu_2)^2\right) +$$

$$\sqrt{2\pi}\sigma\exp\left(-\frac{1}{2\sigma^2}(i - \mu_2)^2\right) * \sqrt{2\pi}\sigma\exp\left(-\frac{1}{2\sigma^2}(j - \mu_1)^2\right)$$

$$\mu_1 = \text{mean}([1, \text{ceil}(g/2)]) \quad \mu_2 = \text{mean}([\text{floor}(g/2), g])$$

$$\sigma = \text{sd}([1, g])$$

$$w = \begin{bmatrix} 0.88 & 0.94 & 0.61 & 0.28 \\ 0.94 & 1.12 & 0.94 & 0.61 \\ 0.61 & 0.94 & 1.12 & 0.94 \\ 0.28 & 0.61 & 0.94 & 0.88 \end{bmatrix}$$

*Gaussian 2 focus* uses two Gaussian functions. One is centered in the middle of the upper left quadrant, while the other is centered at the lower right quadrant. The resulting  $w$  is the sum of the two Gaussians. Elements in the top left and lower right (low value voxels with low value neighbors and high value voxels with high value neighbors) are emphasized over voxels where low value voxels occur next to high value ones

## GAUSSIAN 2 FOCUS NON-DIAGONAL

$$w_{ij} = \frac{1}{\sqrt{2\pi}\sigma \exp(-\frac{1}{2\sigma^2}(i - \mu_1)^2)} * \frac{1}{\sqrt{2\pi}\sigma \exp(-\frac{1}{2\sigma^2}(j - \mu_1)^2)} +$$

$$\frac{1}{\sqrt{2\pi}\sigma \exp(-\frac{1}{2\sigma^2}(i - \mu_2)^2)} * \frac{1}{\sqrt{2\pi}\sigma \exp(-\frac{1}{2\sigma^2}(j - \mu_2)^2)}$$

$$\mu_1 = \text{mean}([1, \text{ceil}(g/2)]) \quad \mu_2 = \text{mean}([\text{floor}(g/2), g])$$

$$\sigma = \text{sd}([1, g])$$

$$w = \begin{bmatrix} 0.00 & 0.94 & 0.61 & 0.28 \\ 0.94 & 0.00 & 0.94 & 0.61 \\ 0.61 & 0.94 & 0.00 & 0.94 \\ 0.28 & 0.61 & 0.94 & 0.00 \end{bmatrix}$$

*Gaussian 2 focus non-diagonal* is very similar to *Gaussian 2 focus* except that the diagonal elements of  $w$  are 0, therefore same value voxel pairs are not considered in the statistic.

## INVERSE GAUSSIAN 2 FOCUS

$$w_{ij} = \frac{1}{\sqrt{2\pi}\sigma \exp(-\frac{1}{2\sigma^2}(i - \mu_1)^2)} * \frac{1}{\sqrt{2\pi}\sigma \exp(-\frac{1}{2\sigma^2}(j - \mu_1)^2)} +$$

$$\frac{1}{\sqrt{2\pi}\sigma \exp(-\frac{1}{2\sigma^2}(i - \mu_2)^2)} * \frac{1}{\sqrt{2\pi}\sigma \exp(-\frac{1}{2\sigma^2}(j - \mu_2)^2)}$$

$$\mu_1 = \text{mean}([1, \text{ceil}(g/2)]) \quad \mu_2 = \text{mean}([\text{floor}(g/2), g])$$

$$\sigma = \text{sd}([1, g])$$

$$w = \begin{bmatrix} 43.68 & 13.97 & 9.15 & 14.06 \\ 13.97 & 5.02 & 4.23 & 9.15 \\ 9.15 & 4.23 & 5.02 & 13.97 \\ 14.06 & 9.15 & 13.97 & 43.68 \end{bmatrix}$$

*Inverse Gaussian 2 focus* uses the reciprocal value of two Gaussian functions. One is centered in the middle of the upper left quadrant, while the other is centered at the lower right quadrant. The resulting  $w$  is the sum of the two Gaussians. Elements on the perimeter of the matrix are emphasized over values in the middle of the matrix in a way, that elements closer to the main diagonal receive higher weights.

## INVERSE GAUSSIAN 2 FOCUS NON-DIAGONAL

$$w_{ij} = \frac{1}{\sqrt{2\pi}\sigma \exp(-\frac{1}{2\sigma^2}(i - \mu_1)^2)} * \frac{1}{\sqrt{2\pi}\sigma \exp(-\frac{1}{2\sigma^2}(j - \mu_1)^2)} +$$

$$\frac{1}{\sqrt{2\pi}\sigma \exp(-\frac{1}{2\sigma^2}(i - \mu_2)^2)} * \frac{1}{\sqrt{2\pi}\sigma \exp(-\frac{1}{2\sigma^2}(j - \mu_2)^2)}$$

$$\mu_1 = \text{mean}([1, \text{ceil}(g/2)]) \quad \mu_2 = \text{mean}([\text{floor}(g/2), g])$$

$$\sigma = \text{sd}([1, g])$$

$$w = \begin{bmatrix} 0.00 & 13.97 & 9.15 & 14.06 \\ 13.97 & 0.00 & 4.23 & 9.15 \\ 9.15 & 4.23 & 0.00 & 13.97 \\ 14.06 & 9.15 & 13.97 & 0.00 \end{bmatrix}$$

*Inverse Gaussian 2 focus non-diagonal* is very similar to *Inverse Gaussian 2 focus* except that the diagonal elements of  $w$  are 0, therefore same value voxel pairs are not considered in the statistic.

## GAUSSIAN 2 POLAR

$$w_{ij} = \frac{1}{\sqrt{2\pi}\sigma \exp(-\frac{1}{2\sigma^2}(i - 1)^2)} * \frac{1}{\sqrt{2\pi}\sigma \exp(-\frac{1}{2\sigma^2}(j - 1)^2)} +$$

$$\frac{1}{\sqrt{2\pi}\sigma \exp(-\frac{1}{2\sigma^2}(i - g)^2)} * \frac{1}{\sqrt{2\pi}\sigma \exp(-\frac{1}{2\sigma^2}(j - g)^2)}$$

$$\sigma = \text{sd}([1, g])$$

$$w = \begin{bmatrix} 1.00 & 0.76 & 0.35 & 0.13 \\ 0.76 & 0.64 & 0.45 & 0.35 \\ 0.35 & 0.45 & 0.64 & 0.76 \\ 0.13 & 0.35 & 0.76 & 1.00 \end{bmatrix}$$

*Inverse Gaussian 2 polar* uses two Gaussian functions. One is centered in the top left, the other is centered in the bottom right. The resulting  $w$  is the sum of the two Gaussians. Elements in the top left and lower right (low value voxels with low value neighbors and high value voxels with high value neighbors) are emphasized over voxels where low value voxels occur next to high value ones.



## GAUSSIAN 2 POLAR NON-DIAGONAL

$$w_{ij} = \sqrt{2\pi}\sigma \exp\left(-\frac{1}{2\sigma^2}(i-1)^2\right) * \sqrt{2\pi}\sigma \exp\left(-\frac{1}{2\sigma^2}(j-1)^2\right) + \sqrt{2\pi}\sigma \exp\left(-\frac{1}{2\sigma^2}(i-g)^2\right) * \sqrt{2\pi}\sigma \exp\left(-\frac{1}{2\sigma^2}(j-g)^2\right)$$

$$\sigma = sd([1, g])$$

$$w = \begin{bmatrix} 0.00 & 0.76 & 0.35 & 0.13 \\ 0.76 & 0.00 & 0.45 & 0.35 \\ 0.35 & 0.45 & 0.00 & 0.76 \\ 0.13 & 0.35 & 0.76 & 0.00 \end{bmatrix}$$

*Inverse Gaussian 2 polar non-diagonal* is very similar to *Inverse Gaussian 2 polar* except that the diagonal elements of  $w$  are 0, therefore same value voxel pairs are not considered in the statistic.

## INVERSE GAUSSIAN 2 POLAR

$$w_{ij} = \sqrt{2\pi}\sigma \exp\left(-\frac{1}{2\sigma^2}(i-1)^2\right) * \sqrt{2\pi}\sigma \exp\left(-\frac{1}{2\sigma^2}(j-1)^2\right) + \sqrt{2\pi}\sigma \exp\left(-\frac{1}{2\sigma^2}(i-g)^2\right) * \sqrt{2\pi}\sigma \exp\left(-\frac{1}{2\sigma^2}(j-g)^2\right)$$

$$\sigma = sd([1, g])$$

$$w = \begin{bmatrix} 222.41 & 50.75 & 23.41 & 29.76 \\ 50.75 & 12.85 & 8.96 & 23.41 \\ 23.41 & 8.96 & 12.85 & 50.75 \\ 29.76 & 23.41 & 50.75 & 222.41 \end{bmatrix}$$

*Inverse Gaussian 2 polar* uses the reciprocal value of two Gaussian functions. One is centered in the top left, the other is centered in the bottom right. The resulting  $w$  is the sum of the two Gaussians. Elements on the perimeter of the matrix are emphasized over values in the middle of the matrix in a way, that elements closer to the main diagonal receive higher weights.

## INVERSE GAUSSIAN 2 POLAR NON-DIAGONAL

$$w_{ij} = \sqrt{2\pi}\sigma \exp\left(-\frac{1}{2\sigma^2}(i-1)^2\right) * \sqrt{2\pi}\sigma \exp\left(-\frac{1}{2\sigma^2}(j-1)^2\right) + \sqrt{2\pi}\sigma \exp\left(-\frac{1}{2\sigma^2}(i-g)^2\right) * \sqrt{2\pi}\sigma \exp\left(-\frac{1}{2\sigma^2}(j-g)^2\right)$$

$$\sigma = sd([1, g])$$

$$w = \begin{bmatrix} 0.00 & 50.75 & 23.41 & 29.76 \\ 50.75 & 0.00 & 8.96 & 23.41 \\ 23.41 & 8.96 & 0.00 & 50.75 \\ 29.76 & 23.41 & 50.75 & 0.00 \end{bmatrix}$$

*Inverse Gaussian 2 polar non-diagonal* is very similar to *Inverse Gaussian 2 polar* except that the diagonal elements of  $w$  are 0, therefore same value voxel pairs are not considered in the statistic.

## CLUSTER PROMINENCE

$$w_{ij} = (i + j - \mu_x(i) - \mu_y(j))^4$$

$$\mu_x(i) = \text{mean}(glcm_i * g_l) \quad \mu_y(j) = \text{mean}(glcm_j * g_l)$$

$$w = \begin{bmatrix} 10.38 & 57.61 & 198.81 & 467.53 \\ 57.61 & 190.47 & 494.23 & 990.49 \\ 198.81 & 494.23 & 1066.76 & 1909.00 \\ 467.53 & 990.49 & 1909.00 & 3172.51 \end{bmatrix}$$

*Cluster prominence* multiplies the elements of the  $glcm$  with a  $w$  matrix where the elements are equal to the values of the two compared voxels, minus the average value we expect next to a  $i$  value voxel and the average value we expect to a  $j$  value voxel. This difference is then taken to the fourth power.

### CLUSTER PROMINENCE NON-DIAGONAL

$$w_{ij} = (i + j - \mu_x(i) - \mu_y(j))^4$$

$$\mu_x(i) = \text{mean}(g_{lcm_i} * g_l) \quad \mu_y(j) = \text{mean}(g_{lcm_j} * g_l)$$

$$w = \begin{bmatrix} 0.00 & 57.61 & 198.81 & 467.53 \\ 57.61 & 0.00 & 494.23 & 990.49 \\ 198.81 & 494.23 & 0.00 & 1909.00 \\ 467.53 & 990.49 & 1909.00 & 0.00 \end{bmatrix}$$

*Cluster prominence non-diagonal* is very similar to *Cluster prominence* except that the diagonal elements of  $w$  are 0, therefore same value voxel pairs are not considered in the statistic.

### INVERSE CLUSTER PROMINENCE

$$w_{ij} = \frac{1}{(i + j + \mu_x(i) + \mu_y(i))^4}$$

$$\mu_x(i) = \text{mean}(g_{lcm_i} * g_l) \quad \mu_y(j) = \text{mean}(g_{lcm_j} * g_l)$$

$$w = \begin{bmatrix} 0.10 & 0.02 & 0.01 & 0.00 \\ 0.02 & 0.01 & 0.00 & 0.00 \\ 0.01 & 0.00 & 0.00 & 0.00 \\ 0.00 & 0.00 & 0.00 & 0.00 \end{bmatrix}$$

*Inverse cluster prominence* takes the reciprocal value of the weights of *Cluster prominence*.

### INVERSE CLUSTER PROMINENCE NON-DIAGONAL

$$w_{ij} = \frac{1}{(i + j + \mu_x(i) + \mu_y(i))^4}$$

$$\mu_x(i) = \text{mean}(g_{lcm_i} * g_l) \quad \mu_y(j) = \text{mean}(g_{lcm_j} * g_l)$$

$$w = \begin{bmatrix} 0.00 & 0.02 & 0.01 & 0.00 \\ 0.02 & 0.00 & 0.00 & 0.00 \\ 0.01 & 0.00 & 0.00 & 0.00 \\ 0.00 & 0.00 & 0.00 & 0.00 \end{bmatrix}$$

*Inverse cluster prominence non-diagonal* is very similar to *Inverse cluster prominence* except that the diagonal elements of  $w$  are 0,

therefore same value voxel pairs are not considered in the statistic.

### CLUSTER SHADE

$$w_{ij} = (i + j - \mu_x(i) - \mu_y(j))^3$$

$$\mu_x(i) = \text{mean}(g_{lcm_i} * g_l) \quad \mu_y(j) = \text{mean}(g_{lcm_j} * g_l)$$

$$w = \begin{bmatrix} 5.78 & 20.91 & 52.95 & 100.54 \\ 20.91 & 51.27 & 104.82 & 176.56 \\ 52.95 & 104.82 & 186.66 & 288.80 \\ 100.54 & 176.56 & 288.80 & 422.72 \end{bmatrix}$$

*Cluster shade* multiplies the elements of the *g<sub>lcm</sub>* with a  $w$  matrix where the elements are equal to the values of the two compared voxels, minus the average value we expect next to a  $i$  value voxel and the average value we expect to a  $j$  value voxel. This difference is then taken to the third power.

### CLUSTER SHADE NON-DIAGONAL

$$w_{ij} = (i + j - \mu_x(i) - \mu_y(j))^3$$

$$\mu_x(i) = \text{mean}(g_{lcm_i} * g_l) \quad \mu_y(j) = \text{mean}(g_{lcm_j} * g_l)$$

$$w = \begin{bmatrix} 0.00 & 20.91 & 52.95 & 100.54 \\ 20.91 & 0.00 & 104.82 & 176.56 \\ 52.95 & 104.82 & 0.00 & 288.80 \\ 100.54 & 176.56 & 288.80 & 0.00 \end{bmatrix}$$

*Cluster shade non-diagonal* is very similar to *Cluster shade* except that the diagonal elements of  $w$  are 0, therefore same value voxel pairs are not considered in the statistic.

### INVERSE CLUSTER SHADE

$$w_{ij} = \frac{1}{(i + j + \mu_x(i) + \mu_y(i))^3}$$

$$\mu_x(i) = \text{mean}(g_{lcm_i} * g_l) \quad \mu_y(j) = \text{mean}(g_{lcm_j} * g_l)$$

$$w = \begin{bmatrix} 0.17 & 0.05 & 0.02 & 0.01 \\ 0.05 & 0.02 & 0.01 & 0.01 \\ 0.02 & 0.01 & 0.01 & 0.00 \\ 0.01 & 0.01 & 0.00 & 0.00 \end{bmatrix}$$

*Inverse cluster shade* takes the reciprocal value of the weights of *Cluster shade*.

### INVERSE CLUSTER SHADE NON-DIAGONAL

$$w_{ij} = \frac{1}{(i + j + \mu_x(i) + \mu_y(i))^3}$$

$$\mu_x(i) = \text{mean}(glcm_i * g_l) \quad \mu_y(j) = \text{mean}(glcm_j * g_l)$$

$$w = \begin{bmatrix} 0.00 & 0.05 & 0.02 & 0.01 \\ 0.05 & 0.00 & 0.01 & 0.01 \\ 0.02 & 0.01 & 0.00 & 0.00 \\ 0.01 & 0.01 & 0.00 & 0.00 \end{bmatrix}$$

*Inverse cluster shade non-diagonal* is very similar to *Inverse cluster shade* except that the diagonal elements of  $w$  are 0, therefore same value voxel pairs are not considered in the statistic.

### CLUSTER TENDENCY

$$w_{ij} = (i + j - \mu_x(i) - \mu_y(j))^2$$

$$\mu_x(i) = \text{mean}(glcm_i * g_l) \quad \mu_y(j) = \text{mean}(glcm_j * g_l)$$

$$w = \begin{bmatrix} 3.22 & 7.59 & 14.10 & 21.62 \\ 7.59 & 13.80 & 22.23 & 31.47 \\ 14.10 & 22.23 & 32.66 & 43.69 \\ 21.62 & 31.47 & 43.69 & 56.33 \end{bmatrix}$$

*Cluster tendency* multiplies the elements of the  $glcm$  with a  $w$  matrix where the elements are equal to the values of the two compared voxels, minus the average value we expect next to a  $i$  value voxel and the average value we expect to a  $j$  value voxel. This difference is then taken to the second power.

### CLUSTER TENDENCY NON-DIAGONAL

$$w_{ij} = (i + j - \mu_x(i) - \mu_y(j))^2$$

$$\mu_x(i) = \text{mean}(glcm_i * g_l) \quad \mu_y(j) = \text{mean}(glcm_j * g_l)$$

$$w = \begin{bmatrix} 0.00 & 7.59 & 14.10 & 21.62 \\ 7.59 & 0.00 & 22.23 & 31.47 \\ 14.10 & 22.23 & 0.00 & 43.69 \\ 21.62 & 31.47 & 43.69 & 0.00 \end{bmatrix}$$

*Cluster tendency non-diagonal* is very similar to *Cluster tendency* except that the diagonal elements of  $w$  are 0, therefore same value voxel pairs are not considered in the statistic.

### INVERSE CLUSTER TENDENCY

$$w_{ij} = \frac{1}{(i + j + \mu_x(i) + \mu_y(i))^2}$$

$$\mu_x(i) = \text{mean}(glcm_i * g_l) \quad \mu_y(j) = \text{mean}(glcm_j * g_l)$$

$$w = \begin{bmatrix} 0.31 & 0.13 & 0.07 & 0.05 \\ 0.13 & 0.07 & 0.04 & 0.03 \\ 0.07 & 0.04 & 0.03 & 0.02 \\ 0.05 & 0.03 & 0.02 & 0.02 \end{bmatrix}$$

*Inverse cluster tendency* takes the reciprocal value of the weights of *Cluster tendency*.

### INVERSE CLUSTER TENDENCY NON-DIAGONAL

$$w_{ij} = \frac{1}{(i + j + \mu_x(i) + \mu_y(i))^2}$$

$$\mu_x(i) = \text{mean}(glcm_i * g_l) \quad \mu_y(j) = \text{mean}(glcm_j * g_l)$$

$$w = \begin{bmatrix} 0.00 & 0.13 & 0.07 & 0.05 \\ 0.13 & 0.00 & 0.04 & 0.03 \\ 0.07 & 0.04 & 0.00 & 0.02 \\ 0.05 & 0.03 & 0.02 & 0.00 \end{bmatrix}$$

*Inverse cluster tendency non-diagonal* is very similar to *Inverse cluster tendency* except that the diagonal elements of  $w$  are 0, therefore same value voxel pairs are not considered in the statistic.

## CLUSTER DIFFERENCE

$$w_{ij} = |i + j - \mu_x(i) - \mu_y(j)|$$

$$\mu_x(i) = \text{mean}(g_{lcm_i} * g_l) \quad \mu_y(j) = \text{mean}(g_{lcm_j} * g_l)$$

$$w = \begin{bmatrix} 1.80 & 2.75 & 3.75 & 4.65 \\ 2.75 & 3.71 & 4.71 & 5.61 \\ 3.75 & 4.71 & 5.71 & 6.61 \\ 4.65 & 5.61 & 6.61 & 7.51 \end{bmatrix}$$

*Cluster difference* multiplies the elements of the *glcm* with a *w* matrix where the elements are equal to the values of the two compared voxels, minus the average value we expect next to a *i* value voxel and the average value we expect to a *j* value voxel.

## CLUSTER DIFFERENCE NON-DIAGONAL

$$w_{ij} = |i + j - \mu_x(i) - \mu_y(j)|$$

$$\mu_x(i) = \text{mean}(g_{lcm_i} * g_l) \quad \mu_y(j) = \text{mean}(g_{lcm_j} * g_l)$$

$$w = \begin{bmatrix} 0.00 & 2.75 & 3.75 & 4.65 \\ 2.75 & 0.00 & 4.71 & 5.61 \\ 3.75 & 4.71 & 0.00 & 6.61 \\ 4.65 & 5.61 & 6.61 & 0.00 \end{bmatrix}$$

*Cluster difference non-diagonal* is very similar to *Cluster difference* except that the diagonal elements of *w* are 0, therefore same value voxel pairs are not considered in the statistic.

## INVERSE CLUSTER DIFFERENCE

$$w_{ij} = \frac{1}{|i + j + \mu_x(i) + \mu_y(i)|}$$

$$\mu_x(i) = \text{mean}(g_{lcm_i} * g_l) \quad \mu_y(j) = \text{mean}(g_{lcm_j} * g_l)$$

$$w = \begin{bmatrix} 0.56 & 0.36 & 0.27 & 0.22 \\ 0.36 & 0.27 & 0.21 & 0.18 \\ 0.27 & 0.21 & 0.17 & 0.15 \\ 0.22 & 0.18 & 0.15 & 0.13 \end{bmatrix}$$

*Inverse cluster difference* takes the reciprocal value of the weights of *Cluster difference*.

## INVERSE CLUSTER DIFFERENCE NON-DIAGONAL

$$w_{ij} = \frac{1}{|i + j + \mu_x(i) + \mu_y(i)|}$$

$$\mu_x(i) = \text{mean}(g_{lcm_i} * g_l) \quad \mu_y(j) = \text{mean}(g_{lcm_j} * g_l)$$

$$w = \begin{bmatrix} 0.00 & 0.36 & 0.27 & 0.22 \\ 0.36 & 0.00 & 0.21 & 0.18 \\ 0.27 & 0.21 & 0.00 & 0.15 \\ 0.22 & 0.18 & 0.15 & 0.00 \end{bmatrix}$$

*Inverse cluster difference non-diagonal* is very similar to *Inverse cluster difference* except that the diagonal elements of *w* are 0, therefore same value voxel pairs are not considered in the statistic.

## MEAN

$$w_{ij} = g_l$$

$$w = \begin{bmatrix} 1 & 1 & 1 & 1 \\ 2 & 2 & 2 & 2 \\ 3 & 3 & 3 & 3 \\ 4 & 4 & 4 & 4 \end{bmatrix}$$

*Mean* is a measure of the average  $f(g_{lcm})$  values. Since the elements of the *glcm* are symmetrical, therefore calculations based on rows (*i*) are equivalent if calculations were done on columns (*j*).

## VARIANCE

$$w_{ij} = (i - \mu)^2 \quad \mu = \text{mean}(g_{lcm} * g_l)$$

$$w = \begin{bmatrix} 2.37 & 2.37 & 2.37 & 2.37 \\ 0.29 & 0.29 & 0.29 & 0.29 \\ 0.21 & 0.21 & 0.21 & 0.21 \\ 2.13 & 2.13 & 2.13 & 2.13 \end{bmatrix}$$

*Variance* is a measure of the variation of the elements in the *glcm*. Since the elements of the *glcm* are symmetrical, therefore calculations based on rows (*i*) are equivalent if calculations were done on columns (*j*).

$$w = \begin{bmatrix} 1.79 & 0.63 & -0.53 & -1.69 \\ 0.63 & 0.22 & -0.19 & -0.59 \\ -0.53 & -0.19 & 0.16 & 0.51 \\ -1.69 & -0.59 & 0.51 & 1.60 \end{bmatrix}$$

*Correlation* is a measure of the linear dependency of neighboring voxels. As opposed to previous cases, here the weight matrix is a function of  $f(\text{glcm})$ , therefore for each statistical measure we have a separate weight matrix.

### CORRELATION

$$w_{ij} = \frac{(i - \mu) * (j - \mu)}{\sigma^2}$$

$$\mu = \text{mean}(\text{glcm} * g_l) \quad \sigma = \text{sum}(\text{glcm} * (g_l - \mu)^2)$$

Previous statistics used different weights for emphasizing specific elements of the *glcm*. The following statistics aggregate the *glcm* values based on some equation to prioritize given *glcm* elements over others.

### Sum

Sum statistics groups the *glcm* elements based on which row and column they are in. Values where  $i+j$  is the same are combined together. This results in aggregating together elements of the *glcm* which are on one-line perpendicular to the main diagonal. This is indicated in the mask matrix (*m*), where same value elements will be grouped together in the *glcm* to calculate the statistic. Each of the statistics takes a function (*f*) of these combined values and multiplies these values with given weights (*we*).

$$p_{x+y}(k) = \sum_{i=1}^g \sum_{j=1}^g \text{glcm}_{ij} \quad | \quad i + j = k; k \in [2, 2g]$$

$$m = \begin{bmatrix} 2 & 3 & 4 & 5 \\ 3 & 4 & 5 & 6 \\ 4 & 5 & 6 & 7 \\ 5 & 6 & 7 & 8 \end{bmatrix}$$

### SUM AVERAGE

$$we = k \quad f(x) = x$$

$$\sum_{k=2}^{2g} k p_{x+y}(k)$$

### SUM ENERGY

$$we = k \quad f(x) = x^2$$

$$\sum_{k=2}^{2g} kp_{x+y}(k)^2$$

### SUM ENTROPY

$$we = -p_{x+y}(k) \quad f(x) = \log_2 x$$

$$\sum_{k=2}^{2g} -p_{x+y}(k) \log_2(p_{x+y}(k))$$

### SUM VARIANCE

$$we = (k - SE)^2 ; SE = \text{Sum entropy} \quad f(x) = x$$

$$\sum_{k=2}^{2g} (k - SE)^2 p_{x+y}(k)$$

### Difference

Difference statistics groups the *glcm* elements based on which row and column they are in. Values where  $|i-j|$  is the same are combined together. This results in aggregating together elements of the *glcm* which are parallel to the main diagonal. This is indicated in the mask matrix ( $m$ ), where same value elements will be grouped together in the *glcm* to calculate the statistic. Each of the statistics takes a function ( $f$ ) of these combined values and multiplies these values with given weights ( $we$ ).

$$p_{x-y}(k) = \sum_{i=1}^g \sum_{j=1}^g glcm_{ij} \quad |i - j = k; k \in [0, g - 1]$$

$$m = \begin{bmatrix} 0 & 1 & 2 & 3 \\ 1 & 0 & 1 & 2 \\ 2 & 1 & 0 & 1 \\ 3 & 2 & 1 & 0 \end{bmatrix}$$

### DIFFERENCE AVERAGE

$$we = k \quad f(x) = x$$

$$\sum_{k=0}^{g-1} kp_{x-y}(k)$$

### DIFFERENCE ENERGY

$$we = k \qquad f(x) = x^2$$

$$\sum_{k=0}^{g-1} k p_{x-y}(k)^2$$

### DIFFERENCE ENTROPY

$$we = -p_{x-y}(k) \qquad f(x) = \log_2 x$$

$$\sum_{k=0}^{g-1} -p_{x-y}(k) \log_2(p_{x-y}(k))$$

### DIFFERENCE VARIANCE

$$we = (k - DE)^2; DE = Difference\ entropy \qquad f(x) = x$$

$$\sum_{k=0}^{g-1} (k - DE)^2 p_{x-y}(k)$$

### *Inverse sum*

Inverse statistics groups the *g lcm* elements based on which row and column they are in. Values where  $i+j$  is the same are combined together. This results in aggregating together elements of the *g lcm* which are on one-line perpendicular to the main diagonal. This is indicated in the mask matrix ( $m$ ), where same value elements will be grouped together in the *g lcm* to calculate the statistic. Each of the statistics takes a function ( $f$ ) of these combined values and multiplies these values with given weights ( $we$ ). Inverse sum is similar to sum statistics, except that it uses the reciprocal values of the weights, therefore the opposite elements are emphasized as compared to sum statistics. Entropy does not use weights proportional to the row or column value, it would be equal to sum entropy, therefore it is undefined.

$$p_{x+y}(k) = \sum_{i=1}^g \sum_{j=1}^g glcm_{ij} \quad | \quad i + j = k; k \in [2, 2g]$$

$$m = \begin{bmatrix} 2 & 3 & 4 & 5 \\ 3 & 4 & 5 & 6 \\ 4 & 5 & 6 & 7 \\ 5 & 6 & 7 & 8 \end{bmatrix}$$

### INVERSE SUM AVERAGE

$$we = \frac{1}{k} \quad f(x) = x$$

$$\sum_{k=2}^{2g} \frac{p_{x+y}(k)}{k}$$

### INVERSE SUM ENERGY

$$we = \frac{1}{k} \quad f(x) = x^2$$

$$\sum_{k=2}^{2g} \frac{p_{x+y}(k)^2}{k}$$

### INVERSE SUM VARIANCE

$$we = \frac{1}{(k - SE)^2} ; SE = \text{Sum entropy} \quad f(x) = x$$

$$\sum_{k=2}^{2g} \frac{p_{x+y}(k)}{(k - SE)^2}$$

### *Inverse difference*

Inverse difference statistics groups the *glcm* elements based on which row and column they are in. Values where  $|i-j|$  is the same are combined together. This results in aggregating together elements of the *glcm* which are parallel to the main diagonal. This is indicated in the mask matrix ( $m$ ), where same value elements will be grouped together in the *glcm* to calculate the statistic. Each of the statistics takes a function ( $f$ ) of these combined values and multiplies these values with given weights ( $we$ ). Inverse difference is similar to difference statistics, except that it uses the reciprocal values of the weights, therefore the opposite elements are emphasized as compared to sum statistics. Since division by 0 is undefined, main diagonal elements are considered to be 0. Entropy does not use weights proportional to the row or column value, it would be equal to difference entropy, therefore it is undefined.

$$p_{x-y}(k) = \sum_{i=1}^g \sum_{j=1}^g glcm_{ij} \quad | i - j = k; k \in [0, g - 1]$$

$$m = \begin{bmatrix} 0 & 1 & 2 & 3 \\ 1 & 0 & 1 & 2 \\ 2 & 1 & 0 & 1 \\ 3 & 2 & 1 & 0 \end{bmatrix}$$



### INVERSE DIFFERENCE AVERAGE

$$we = \frac{1}{k} \quad f(x) = x$$

$$\sum_{k=0}^{g-1} \frac{p_{x-y}(k)}{k}$$

### INVERSE DIFFERENCE ENERGY

$$we = \frac{1}{k} \quad f(x) = x^2$$

$$\sum_{k=0}^{g-1} \frac{p_{x-y}(k)^2}{k}$$

### INVERSE DIFFERENCE VARIANCE

$$we = \frac{1}{(k - DE)^2} ; DE = \text{Difference entropy} \quad f(x) = x$$

$$\sum_{k=0}^{g-1} \frac{p_{x-y}(k)}{(k - DE)^2}$$

*Further glcm functions*

The following metrics cannot be grouped into either of the previous cases. These metrics are standalone functions of the elements of the *glcm*.

### INFORMATION MEASURE OF CORRELATION 1 (IMC1)

$H = \text{entropy}(glcm)$

$HX = \text{entropy}(p_x)$

$HY = \text{entropy}(p_y)$

$$HXY1 = \sum_{i=1}^g \sum_{j=1}^g -glcm_{ij} \log_2(p_x(i)p_y(j))$$

$p_x = (\text{row marginal distribution})$

$p_y = (\text{column marginal distribution})$

$$IMC1 = \frac{H - HXY1}{\max(HX, HY)}$$

## INFORMATION MEASURE OF CORRELATION 2 (IMC2)

$$H = \text{entropy}(glcm)$$

$$HX = \text{entropy}(p_x)$$

$$HY = \text{entropy}(p_y)$$

$$HXY2 = \sum_{i=1}^g \sum_{j=1}^g -p_x(i)p_y(j) \log_2(p_x(i)p_y(j))$$

$$p_x = (\text{row marginal distribution})$$

$$p_y = (\text{column marginal distribution})$$

$$IMC2 = \sqrt{1 - e^{-2(HXY2-H)}}$$

## ENERGY

$$\sum_{i=1}^g \sum_{j=1}^g glcm_{ij}^2$$

## ENTROPY

$$\sum_{i=1}^g \sum_{j=1}^g -glcm_{ij} \log_2 glcm_{ij}$$

### *First-order statistics of GLCM*

All GLCMs can be seen as an array of probability values, and therefore first-order statistics can be used to describe different aspects of the distribution.

## Gray level run length matrix (GLRLM)

Many statistics calculated from GLRLMs are a sum of: the elements in the GLRLM (*glrlm*) matrix multiplied by a weighing matrix (*w*). Using mathematical notation, we can write:

$$w * glrlm$$

By choosing different weights, we can emphasize specific elements of the *glrlm* over others, depending on what attribute of the run lengths we wish to highlight. Basic concepts which help to understand the information stored in the *glrlm* are:

- *glrlm[i,j]*: the number of times *i* value voxels are next to each other *j* times
- The first column stores the number of times voxels do not have same value neighbors
- The upper left quadrant of the matrix holds frequencies of how many times low attenuation voxels have few same value neighbors
- The lower left quadrant of the matrix stores frequencies of how many times high attenuation voxels have few same value neighbors
- The upper right quadrant of the matrix holds frequencies of how many times low attenuation voxels have many same value neighbors
- The lower right quadrant of the matrix stores frequencies of how many times high attenuation voxels have many same value neighbors

For all proceeding glcm statistics let:

*dim*: the maximum number of voxels present in the given direction

*g*: the number of gray levels the image has been discretized into

*glrlm*: the gray level run length matrix, with *g* number of rows and *dim* number columns

*w*: the weighing matrix, with *g* number of rows and *dim* number columns

*i*: the *i*<sup>th</sup> row

*j*: the *j*<sup>th</sup> row

*n<sub>r</sub>*: number of run lengths

*n<sub>v</sub>*: number of voxels

For all statistics, the examples will be given for the following 4x5 *glrlm* matrix

$$glrlm = \begin{bmatrix} 25 & 16 & 11 & 7 & 7 \\ 105 & 20 & 13 & 5 & 2 \\ 122 & 27 & 8 & 2 & 1 \\ 124 & 25 & 10 & 3 & 0 \end{bmatrix}$$

To achieve comparable results between different images, the results can be divided by  $n_r$ , which is a normalizing factor.

For all statistics, the  $w$  matrix is given.

## Weighed matrix statistics

### SHORT RUN EMPHASIS (SRE)

$$w = \frac{1}{j^2}$$
$$w = \begin{bmatrix} 1 & 0.25 & 0.11 & 0.06 & 0.04 \\ 1 & 0.25 & 0.11 & 0.06 & 0.04 \\ 1 & 0.25 & 0.11 & 0.06 & 0.04 \\ 1 & 0.25 & 0.11 & 0.06 & 0.04 \end{bmatrix}$$

SRE gives higher weights to short run lengths, therefore images where intensity values change quickly in the given direction have higher values, while images with many same value voxels next to each other receive lower values.

### LONG RUN EMPHASIS (LRE)

$$w = j^2$$
$$w = \begin{bmatrix} 1 & 4 & 9 & 16 & 25 \\ 1 & 4 & 9 & 16 & 25 \\ 1 & 4 & 9 & 16 & 25 \\ 1 & 4 & 9 & 16 & 25 \end{bmatrix}$$

LRE gives higher weights to long run lengths, therefore images where intensity values change slowly in the given direction have higher values, while images with many different value voxels next to each other receive lower values.

### LOW GRAY LEVEL RUN EMPHASIS (LGLRE)

$$w = \frac{1}{i^2}$$
$$w = \begin{bmatrix} 1 & 1 & 1 & 1 & 1 \\ 0.25 & 0.25 & 0.25 & 0.25 & 0.25 \\ 0.11 & 0.11 & 0.11 & 0.11 & 0.11 \\ 0.06 & 0.06 & 0.06 & 0.06 & 0.06 \end{bmatrix}$$

LGLRE gives higher weights low value voxels, therefore images with predominantly low attenuation values will receive higher values as compared to images with higher attenuation voxels.

### HIGH GRAY LEVEL RUN EMPHASIS (HGLRE)

$$w = i^2$$
$$w = \begin{bmatrix} 1 & 1 & 1 & 1 & 1 \\ 4 & 4 & 4 & 4 & 4 \\ 9 & 9 & 9 & 9 & 9 \\ 16 & 16 & 16 & 16 & 16 \end{bmatrix}$$

HGLRE gives higher weights to voxels with high attenuation values, therefore images with predominantly high voxel values will receive higher values as compared to images with lower attenuation voxels.

### SHORT RUN LOW GRAY LEVEL EMPHASIS (SRLGLE)

$$w = \frac{1}{i^2 * j^2}$$
$$w = \begin{bmatrix} 1 & 0.25 & 0.11 & 0.06 & 0.04 \\ 0.25 & 0.06 & 0.03 & 0.02 & 0.01 \\ 0.11 & 0.03 & 0.01 & 0.01 & 0.00 \\ 0.06 & 0.02 & 0.01 & 0.00 & 0.00 \end{bmatrix}$$

SRLGLE gives higher weights low value and low run lengths, therefore images with predominantly low attenuation values which do not occur repeatedly will receive higher values as compared to images with higher

attenuation voxels frequently occurring next to each other.

### LONG RUN HIGH GRAY LEVEL EMPHASIS (LRHGLE)

$$w = i^2 * j^2$$

$$w = \begin{bmatrix} 1 & 4 & 9 & 16 & 25 \\ 4 & 16 & 36 & 64 & 100 \\ 9 & 36 & 81 & 144 & 225 \\ 16 & 64 & 144 & 256 & 400 \end{bmatrix}$$

LRHGLE gives higher weights high value and long run lengths, therefore images with predominantly high attenuation values which occur repeatedly next to each other will receive higher values as compared to images where low attenuation voxels occur randomly next to each other.

### SHORT RUN HIGH GRAY LEVEL EMPHASIS (SRHGLE)

$$w = \frac{i^2}{j^2}$$

$$w = \begin{bmatrix} 1 & 0.25 & 0.11 & 0.06 & 0.04 \\ 4 & 1 & 0.44 & 0.25 & 0.16 \\ 9 & 2.25 & 1 & 0.56 & 0.36 \\ 16 & 4 & 1.78 & 1 & 0.64 \end{bmatrix}$$

SRHGLE gives higher weights high value and low run lengths, therefore images with predominantly high attenuation values which do not occur repeatedly will receive higher

values as compared to images with lower attenuation voxels frequently occurring next to each other.

### LONG RUN LOW GRAY LEVEL EMPHASIS (LRLGLE)

$$w = \frac{j^2}{i^2}$$

$$w = \begin{bmatrix} 1 & 4 & 9 & 16 & 25 \\ 0.25 & 1 & 2.25 & 4 & 6.25 \\ 0.11 & 0.44 & 1 & 1.78 & 2.78 \\ 0.06 & 0.25 & 0.56 & 1 & 1.56 \end{bmatrix}$$

LRLGLE gives higher weights low value and long run lengths, therefore images with predominantly low attenuation values which occur repeatedly will receive higher values as compared to images with higher attenuation voxels which do not occur frequently next to each other.

### RUN PERCENTAGE (RP)

$$w = \frac{1}{n_v} \quad w = \frac{1}{796}$$

RP weighs all elements equally. The more short run lengths there are in the image, the higher the value.

## Summed matrix statistics

The following statistics are calculated by summing the values of the *glrlm* either by rows or columns.

### GRAY LEVEL NONUNIFORMITY (GLN)

$$\sum_{i=1}^g \left( \sum_{j=1}^{dim} glrlm[i, j] \right)^2$$

GLN first add up the elements of the *glrlm* by row and then squares them and sums them. When runs are equally distributed for all gray levels, then it takes up its minimum.

### RUN LENGTH NONUNIFORMITY (RLN)

$$\sum_{j=1}^{dim} \left( \sum_{i=1}^g glrlm[i, j] \right)^2$$

RLN first add up the elements of the *glrlm* by columns and then squares them and sums them. When run lengths for all lengths, then it takes up its minimum

## Shape-based metrics

Shape-based measures derive parameters from the geometrical properties of the lesion.

### 1-, 2-, 3-dimensional statistics

These metrics are calculated from the space occupied by the abnormality

#### VOLUME (V)

$$\begin{aligned}dim_{xy} &= \text{Pixel Spacing} \\ dim_z &= \text{Spacing Between Slices} \\ n * dim_{xy}^2 * dim_z\end{aligned}$$

#### COMPACTNESS1

$$\frac{V}{\sqrt{\pi} A^{\frac{2}{3}}}$$

#### VOLUME RATIO

$$\frac{V_{ROI}}{V_{total}}$$

#### COMPACTNESS2

$$36\pi \frac{V^2}{A^3}$$

#### SURFACE (A)

$$dim_{xy} = \text{Pixel Spacing}$$

$$dim_z = \text{Spacing Between Slices}$$

$n_{yz}$  : number of voxels without any neighbor in direction x

$n_{xz}$  : number of voxels without any neighbor in direction y

$n_{xy}$  : number of voxels without any neighbor in direction z

$$n_{yz} * dim_{xy} * dim_z + n_{xz} * dim_{xy} * dim_z + dim_{xy} * dim_z^2$$

#### SPHERICAL DISPROPORTION

$$\frac{A}{4\pi \left[ \left( \frac{3V}{4\pi} \right)^{\frac{1}{3}} \right]^2}$$

#### SURFACE RATIO

$$\frac{A_{ROI}}{A_{total}}$$

#### SPHERICITY

$$\frac{6V^{\frac{2}{3}} \pi^{\frac{1}{3}}}{A}$$

#### SURFACE TO VOLUME RATIO

$$\frac{A_{ROI}}{V_{ROI}}$$

#### MAXIMUM DIAMETER

$x_i y_i z_i$  : spatial coordinate of voxel i

$$\max(\sqrt{(x_i - x_{i+1})^2 + (y_i - y_{i+1})^2 + (z_i - z_{i+1})^2})$$



## Fractal dimensions

Fractal dimensions enumerate the self-symmetry of an object. The lesions are padded to a isovolumetric cube with sides equal to the next greatest power of two of the longest dimension of the lesion. Smaller and smaller bounding boxes are used to cover the lesion. Limits are approximated by the slope of the regression line through the points at each given scale on a log-log plot.

$p_i$  : normalized probability of a voxel with any value present in bounding box  $i$  with dimension  $\epsilon$   
 $\epsilon$  : the number of boxes needed to cover the padded box in one dimension

### BOX-COUNTING DIMENSION

$$\lim_{\epsilon \rightarrow \infty} \frac{\log_2 \sum_{i=1}^{\epsilon^3} p_i^0}{\log_2 \epsilon}$$

### INFORMATION DIMENSION

$$\lim_{\epsilon \rightarrow \infty} \frac{\sum_{i=1}^{\epsilon^3} -p_i \log_2 p_i}{\log_2 \epsilon}$$

### CORRELATION DIMENSION

$$\lim_{\epsilon \rightarrow \infty} \frac{\log_2 \sum_{i=1}^{\epsilon^3} p_i^2}{\log_2 \epsilon}$$

Correlation dimension is strictly calculated from distances of the data points. A generalization of the Rényi entropy is used to approximate the correlation dimension.

## Supplemental Table

**Supplemental table 1.** Diagnostic performance of radiomic parameters with AUC values above 0.8

| Variable                      | Case   | IQR              | Control | IQR               | p          | AUC   | 95% CI (AUC)   | Sensitivity | Specificity | PPV   | NPV   |
|-------------------------------|--------|------------------|---------|-------------------|------------|-------|----------------|-------------|-------------|-------|-------|
| <b>First order statistics</b> |        |                  |         |                   |            |       |                |             |             |       |       |
| Deciles30__orig               | 53.50  | [36.50; 74.08]   | 93.70   | [75.50; 135.75]   | 0.00054425 | 0.827 | [0.716; 0.921] | 0.833       | 0.733       | 0.758 | 0.815 |
| Quartiles25__orig             | 40.00  | [29.25; 62.06]   | 82.50   | [65.50; 122.00]   | 0.00062135 | 0.826 | [0.712; 0.922] | 0.767       | 0.800       | 0.793 | 0.774 |
| Deciles20__orig               | 31.00  | [15.50; 53.30]   | 71.00   | [56.00; 106.25]   | 0.00087011 | 0.826 | [0.713; 0.924] | 0.800       | 0.767       | 0.774 | 0.793 |
| Har_mean__orig                | 65.79  | [53.74; 80.10]   | 106.27  | [85.37; 141.20]   | 0.00283237 | 0.823 | [0.708; 0.922] | 0.767       | 0.800       | 0.793 | 0.774 |
| Tri_mean__orig                | 67.88  | [47.25; 95.88]   | 111.00  | [88.62; 155.25]   | 0.00071495 | 0.812 | [0.696; 0.910] | 0.867       | 0.667       | 0.722 | 0.833 |
| Deciles40__orig               | 70.50  | [50.50; 99.35]   | 119.00  | [93.75; 165.75]   | 0.00054393 | 0.812 | [0.695; 0.909] | 0.867       | 0.667       | 0.722 | 0.833 |
| Geo_mean__orig                | 524.51 | [342.84; 884.73] | 1000.31 | [736.51; 1516.67] | 0.00160946 | 0.803 | [0.684; 0.902] | 0.633       | 0.900       | 0.864 | 0.711 |
| IQ_mean__orig                 | 100.96 | [71.20; 131.57]  | 146.32  | [121.76; 190.18]  | 0.00075437 | 0.802 | [0.684; 0.902] | 0.600       | 0.933       | 0.900 | 0.700 |
| <b>GLCM</b>                   |        |                  |         |                   |            |       |                |             |             |       |       |
| IQR__ep_b4_d1_avg             | 0.05   | [0.05; 0.06]     | 0.04    | [0.04; 0.05]      | 0.00012117 | 0.867 | [0.769; 0.948] | 0.700       | 0.900       | 0.875 | 0.750 |
| Low_notch__ep_b4_d1_avg       | -0.06  | [-0.07; -0.05]   | -0.03   | [-0.05; -0.01]    | 0.00012017 | 0.866 | [0.763; 0.948] | 0.967       | 0.633       | 0.725 | 0.950 |
| Gauss_rf_s_nd__ep_b16_d3_avg  | 0.00   | [0.00; 0.00]     | 0.00    | [0.00; 0.00]      | 0.00045383 | 0.859 | [0.759; 0.940] | 0.767       | 0.867       | 0.852 | 0.788 |
| Md_AD_mn__ep_b4_d1_avg        | 0.04   | [0.03; 0.04]     | 0.03    | [0.02; 0.03]      | 0.00019997 | 0.856 | [0.744; 0.946] | 0.867       | 0.767       | 0.788 | 0.852 |
| Gauss_rf_s__ep_b32_d3_avg     | 0.00   | [0.00; 0.00]     | 0.00    | [0.00; 0.00]      | 0.00134475 | 0.851 | [0.743; 0.936] | 0.667       | 0.933       | 0.909 | 0.737 |
| Gauss_rf_s_nd__ep_b32_d3_avg  | 0.00   | [0.00; 0.00]     | 0.00    | [0.00; 0.00]      | 0.00128411 | 0.849 | [0.743; 0.936] | 0.600       | 1.000       | 1.000 | 0.714 |
| Sum_energy__ep_b32_d1_avg     | 0.53   | [0.51; 0.54]     | 0.58    | [0.54; 0.62]      | 0.00006803 | 0.848 | [0.740; 0.937] | 0.967       | 0.633       | 0.725 | 0.950 |
| IMC1__ep_b2_d1_avg            | -2.23  | [-2.27; -2.20]   | -2.15   | [-2.18; -2.12]    | 0.00028174 | 0.847 | [0.736; 0.939] | 0.933       | 0.700       | 0.757 | 0.913 |

|                                       |         |                    |         |                     |            |       |                |       |       |       |       |
|---------------------------------------|---------|--------------------|---------|---------------------|------------|-------|----------------|-------|-------|-------|-------|
| Autocorrelation_s_nd_ep_b16_d3_avg    | 0.28    | [0.26; 0.34]       | 0.38    | [0.32; 0.51]        | 0.00045426 | 0.847 | [0.738; 0.931] | 0.667 | 0.933 | 0.909 | 0.737 |
| Cluster_t_s_ep_b16_d3_avg             | 1.42    | [1.33; 1.76]       | 1.96    | [1.60; 2.71]        | 0.00033289 | 0.847 | [0.741; 0.930] | 0.667 | 0.900 | 0.870 | 0.730 |
| Gauss_rp_s_nd_ep_b32_d3_avg           | 0.00    | [0.00; 0.00]       | 0.00    | [0.00; 0.00]        | 0.00056330 | 0.847 | [0.740; 0.929] | 0.633 | 0.933 | 0.905 | 0.718 |
| Inv_Cluster_d_e_nd_ep_b2_d1_avg       | 0.31    | [0.30; 0.33]       | 0.35    | [0.34; 0.37]        | 0.00021110 | 0.846 | [0.734; 0.939] | 1.000 | 0.600 | 0.714 | 1.000 |
| Dif_variance__ep_b2_d1_avg            | 0.47    | [0.44; 0.50]       | 0.52    | [0.51; 0.53]        | 0.00044666 | 0.846 | [0.737; 0.937] | 0.933 | 0.733 | 0.778 | 0.917 |
| Inv_Cluster_d_e__ep_b32_d2_avg        | 0.45    | [0.43; 0.48]       | 0.41    | [0.38; 0.43]        | 0.00003623 | 0.846 | [0.734; 0.934] | 0.900 | 0.733 | 0.771 | 0.880 |
| Gauss_rp_s__ep_b32_d3_avg             | 0.00    | [0.00; 0.00]       | 0.00    | [0.00; 0.00]        | 0.00055069 | 0.846 | [0.740; 0.929] | 0.567 | 0.967 | 0.944 | 0.690 |
| Cluster_p_s__ep_b32_d3_avg            | 3816.59 | [3315.39; 5643.63] | 7016.05 | [5387.94; 11777.20] | 0.00053153 | 0.846 | [0.743; 0.930] | 0.667 | 0.867 | 0.833 | 0.722 |
| Inv_Cluster_t_e_nd_ep_b2_d1_avg       | 0.14    | [0.13; 0.14]       | 0.15    | [0.15; 0.16]        | 0.00016112 | 0.844 | [0.736; 0.933] | 0.800 | 0.767 | 0.774 | 0.793 |
| Gauss_rf_s__ep_b16_d3_avg             | 0.00    | [0.00; 0.00]       | 0.00    | [0.00; 0.00]        | 0.00039954 | 0.844 | [0.740; 0.930] | 0.700 | 0.867 | 0.840 | 0.743 |
| Cluster_t_s__ep_b32_d3_avg            | 2.00    | [1.83; 2.84]       | 3.37    | [2.72; 5.37]        | 0.00102218 | 0.844 | [0.739; 0.936] | 0.667 | 0.933 | 0.909 | 0.737 |
| Contrast_e__ep_b2_d1_avg              | 0.71    | [0.68; 0.75]       | 0.79    | [0.77; 0.83]        | 0.00030475 | 0.843 | [0.733; 0.936] | 0.933 | 0.733 | 0.778 | 0.917 |
| Homogeneity2_e_nd_ep_b2_d1_avg        | 0.36    | [0.34; 0.38]       | 0.40    | [0.39; 0.42]        | 0.00030475 | 0.843 | [0.727; 0.939] | 0.933 | 0.733 | 0.778 | 0.917 |
| Dissimilarity_e__ep_b2_d1_avg         | 0.71    | [0.68; 0.75]       | 0.79    | [0.77; 0.83]        | 0.00030475 | 0.843 | [0.730; 0.939] | 0.933 | 0.733 | 0.778 | 0.917 |
| Homogeneity1_e_nd_ep_b2_d1_avg        | 0.36    | [0.34; 0.38]       | 0.40    | [0.39; 0.42]        | 0.00030475 | 0.843 | [0.729; 0.939] | 0.933 | 0.733 | 0.778 | 0.917 |
| DMN_e__ep_b2_d1_avg                   | 0.18    | [0.17; 0.19]       | 0.20    | [0.19; 0.21]        | 0.00030475 | 0.843 | [0.731; 0.938] | 0.933 | 0.733 | 0.778 | 0.917 |
| IDMN_e_nd_ep_b2_d1_avg                | 0.57    | [0.55; 0.60]       | 0.63    | [0.62; 0.67]        | 0.00030475 | 0.843 | [0.729; 0.938] | 0.933 | 0.733 | 0.778 | 0.917 |
| DN_e__ep_b2_d1_avg                    | 0.36    | [0.34; 0.38]       | 0.40    | [0.39; 0.42]        | 0.00030475 | 0.843 | [0.730; 0.936] | 0.933 | 0.733 | 0.778 | 0.917 |
| IDN_e_nd_ep_b2_d1_avg                 | 0.48    | [0.46; 0.50]       | 0.53    | [0.51; 0.56]        | 0.00030475 | 0.843 | [0.729; 0.937] | 0.933 | 0.733 | 0.778 | 0.917 |
| Autocorrelation_e_nd_ep_b2_d1_avg     | 1.43    | [1.37; 1.50]       | 1.59    | [1.54; 1.67]        | 0.00030475 | 0.843 | [0.730; 0.937] | 0.933 | 0.733 | 0.778 | 0.917 |
| Inv_autocorrelation_e_nd_ep_b2_d1_avg | 0.36    | [0.34; 0.38]       | 0.40    | [0.39; 0.42]        | 0.00030475 | 0.843 | [0.731; 0.936] | 0.933 | 0.733 | 0.778 | 0.917 |
| Gauss_e_nd_ep_b2_d1_avg               | 0.43    | [0.41; 0.46]       | 0.48    | [0.47; 0.51]        | 0.00030475 | 0.843 | [0.732; 0.937] | 0.933 | 0.733 | 0.778 | 0.917 |
| Gauss_lp_e_nd_ep_b2_d1_avg            | 0.26    | [0.25; 0.28]       | 0.29    | [0.28; 0.31]        | 0.00030475 | 0.843 | [0.729; 0.938] | 0.933 | 0.733 | 0.778 | 0.917 |
| Gauss_lf_e_nd_ep_b2_d1_avg            | 0.26    | [0.25; 0.28]       | 0.29    | [0.28; 0.31]        | 0.00030475 | 0.843 | [0.730; 0.936] | 0.933 | 0.733 | 0.778 | 0.917 |
| Gauss_rf_e_nd_ep_b2_d1_avg            | 0.26    | [0.25; 0.28]       | 0.29    | [0.28; 0.31]        | 0.00030475 | 0.843 | [0.732; 0.938] | 0.933 | 0.733 | 0.778 | 0.917 |

|                                  |       |                 |        |                  |            |       |                |       |       |       |       |
|----------------------------------|-------|-----------------|--------|------------------|------------|-------|----------------|-------|-------|-------|-------|
| Gauss_rp_e_nd_ep_b2_d1_avg       | 0.26  | [0.25; 0.28]    | 0.29   | [0.28; 0.31]     | 0.00030475 | 0.843 | [0.731; 0.937] | 0.933 | 0.733 | 0.778 | 0.917 |
| Inv_Gauss_e_nd_ep_b2_d1_avg      | 1.18  | [1.13; 1.24]    | 1.31   | [1.27; 1.37]     | 0.00030475 | 0.843 | [0.729; 0.937] | 0.933 | 0.733 | 0.778 | 0.917 |
| Inv_Gauss_lp_e_nd_ep_b2_d1_avg   | 1.94  | [1.86; 2.04]    | 2.16   | [2.10; 2.26]     | 0.00030475 | 0.843 | [0.730; 0.936] | 0.933 | 0.733 | 0.778 | 0.917 |
| Inv_Gauss_lf_e_nd_ep_b2_d1_avg   | 1.94  | [1.86; 2.04]    | 2.16   | [2.10; 2.26]     | 0.00030475 | 0.843 | [0.731; 0.937] | 0.933 | 0.733 | 0.778 | 0.917 |
| Inv_Gauss_rf_e_nd_ep_b2_d1_avg   | 1.94  | [1.86; 2.04]    | 2.16   | [2.10; 2.26]     | 0.00030475 | 0.843 | [0.730; 0.937] | 0.933 | 0.733 | 0.778 | 0.917 |
| Inv_Gauss_rp_e_nd_ep_b2_d1_avg   | 1.94  | [1.86; 2.04]    | 2.16   | [2.10; 2.26]     | 0.00030475 | 0.843 | [0.729; 0.936] | 0.933 | 0.733 | 0.778 | 0.917 |
| Gauss_2f_e_nd_ep_b2_d1_avg       | 0.53  | [0.50; 0.55]    | 0.58   | [0.57; 0.61]     | 0.00030475 | 0.843 | [0.730; 0.937] | 0.933 | 0.733 | 0.778 | 0.917 |
| Inv_Gauss_2f_e_nd_ep_b2_d1_avg   | 3.88  | [3.71; 4.09]    | 4.31   | [4.19; 4.53]     | 0.00030475 | 0.843 | [0.732; 0.938] | 0.933 | 0.733 | 0.778 | 0.917 |
| Gauss_2p_e_nd_ep_b2_d1_avg       | 0.53  | [0.50; 0.55]    | 0.58   | [0.57; 0.61]     | 0.00030475 | 0.843 | [0.731; 0.936] | 0.933 | 0.733 | 0.778 | 0.917 |
| Inv_Gauss_2p_e_nd_ep_b2_d1_avg   | 3.88  | [3.71; 4.09]    | 4.31   | [4.19; 4.53]     | 0.00030475 | 0.843 | [0.731; 0.937] | 0.933 | 0.733 | 0.778 | 0.917 |
| Inv_Cluster_t_nd_ep_b2_d1_avg    | 0.05  | [0.04; 0.05]    | 0.05   | [0.05; 0.06]     | 0.00018844 | 0.843 | [0.734; 0.936] | 0.967 | 0.633 | 0.725 | 0.950 |
| Dif_entropy_ep_b2_d1_avg         | 0.77  | [0.74; 0.81]    | 0.85   | [0.83; 0.89]     | 0.00032424 | 0.843 | [0.731; 0.938] | 0.933 | 0.733 | 0.778 | 0.917 |
| Inv_Cluster_s_nd_ep_b2_d1_avg    | 0.02  | [0.02; 0.02]    | 0.02   | [0.02; 0.03]     | 0.00016416 | 0.842 | [0.728; 0.933] | 1.000 | 0.600 | 0.714 | 1.000 |
| Md_AD_md_ep_b4_d1_avg            | 0.03  | [0.03; 0.04]    | 0.02   | [0.02; 0.03]     | 0.00020597 | 0.842 | [0.734; 0.930] | 0.967 | 0.567 | 0.690 | 0.944 |
| MAD_ep_b4_d1_avg                 | 0.05  | [0.05; 0.05]    | 0.03   | [0.03; 0.05]     | 0.00020597 | 0.842 | [0.733; 0.932] | 0.967 | 0.567 | 0.690 | 0.944 |
| Gauss_2f_ep_b8_d1_avg            | 0.87  | [0.87; 0.88]    | 0.85   | [0.83; 0.86]     | 0.00033525 | 0.842 | [0.728; 0.936] | 0.933 | 0.667 | 0.737 | 0.909 |
| Cluster_t_s_nd_ep_b16_d3_avg     | 1.27  | [1.17; 1.57]    | 1.72   | [1.43; 2.26]     | 0.00044625 | 0.842 | [0.738; 0.929] | 0.667 | 0.967 | 0.952 | 0.744 |
| Inv_Cluster_d_e_nd_ep_b32_d2_avg | 0.41  | [0.40; 0.43]    | 0.38   | [0.36; 0.40]     | 0.00004454 | 0.842 | [0.734; 0.928] | 0.800 | 0.767 | 0.774 | 0.793 |
| Autocorrelation_s_ep_b32_d3_avg  | 0.45  | [0.41; 0.64]    | 0.75   | [0.61; 1.22]     | 0.00088436 | 0.842 | [0.738; 0.929] | 0.667 | 0.900 | 0.870 | 0.730 |
| Cluster_s_s_nd_ep_b32_d3_avg     | 74.87 | [68.25; 111.77] | 131.20 | [101.02; 226.78] | 0.00072906 | 0.842 | [0.731; 0.930] | 0.633 | 0.967 | 0.950 | 0.725 |
| Inv_Cluster_p_nd_ep_b2_d1_avg    | 0.01  | [0.01; 0.01]    | 0.01   | [0.01; 0.01]     | 0.00014653 | 0.841 | [0.728; 0.931] | 0.767 | 0.800 | 0.793 | 0.774 |
| Inv_Cluster_s_e_nd_ep_b2_d1_avg  | 0.06  | [0.06; 0.06]    | 0.07   | [0.06; 0.07]     | 0.00013362 | 0.841 | [0.734; 0.929] | 0.767 | 0.800 | 0.793 | 0.774 |
| Inv_Cluster_d_nd_ep_b2_d1_avg    | 0.10  | [0.09; 0.11]    | 0.12   | [0.12; 0.14]     | 0.00022209 | 0.841 | [0.728; 0.933] | 0.967 | 0.633 | 0.725 | 0.950 |
| Variance_s_ep_b16_d3_avg         | 0.40  | [0.37; 0.50]    | 0.55   | [0.46; 0.73]     | 0.00030695 | 0.841 | [0.736; 0.928] | 0.667 | 0.933 | 0.909 | 0.737 |
| Inv_Cluster_p_s_nd_ep_b2_d1_avg  | 0.00  | [0.00; 0.00]    | 0.00   | [0.00; 0.00]     | 0.00018653 | 0.840 | [0.727; 0.931] | 0.967 | 0.633 | 0.725 | 0.950 |

|                                     |         |                    |         |                     |            |       |                |       |       |       |       |
|-------------------------------------|---------|--------------------|---------|---------------------|------------|-------|----------------|-------|-------|-------|-------|
| Har_mean__ep_b2_d1_avg              | 0.17    | [0.16; 0.18]       | 0.20    | [0.19; 0.21]        | 0.00028717 | 0.840 | [0.730; 0.933] | 0.933 | 0.667 | 0.737 | 0.909 |
| Md_AD_mn__ep_b8_d1_avg              | 0.01    | [0.01; 0.01]       | 0.01    | [0.01; 0.01]        | 0.00065296 | 0.840 | [0.728; 0.936] | 0.967 | 0.633 | 0.725 | 0.950 |
| Cluster_d_s_nd__ep_b16_d2_avg       | 0.07    | [0.07; 0.07]       | 0.08    | [0.07; 0.09]        | 0.00059495 | 0.840 | [0.732; 0.928] | 0.667 | 0.967 | 0.952 | 0.744 |
| Autocorrelation_s__ep_b16_d3_avg    | 0.32    | [0.29; 0.38]       | 0.45    | [0.35; 0.61]        | 0.00038264 | 0.840 | [0.734; 0.926] | 0.933 | 0.567 | 0.683 | 0.895 |
| Gauss_lf_e__ep_b32_d2_avg           | 4.09    | [3.81; 4.23]       | 3.54    | [3.13; 3.93]        | 0.00006457 | 0.840 | [0.733; 0.923] | 1.000 | 0.533 | 0.682 | 1.000 |
| Gauss_rf_s_nd__ep_b32_d2_avg        | 0.00    | [0.00; 0.00]       | 0.00    | [0.00; 0.00]        | 0.00040025 | 0.840 | [0.731; 0.928] | 0.767 | 0.767 | 0.767 | 0.767 |
| Autocorrelation_s_nd__ep_b32_d3_avg | 0.40    | [0.37; 0.56]       | 0.69    | [0.56; 1.10]        | 0.00093074 | 0.840 | [0.730; 0.930] | 0.600 | 1.000 | 1.000 | 0.714 |
| Cluster_p_s_nd__ep_b32_d3_avg       | 3279.61 | [2994.39; 5170.88] | 5975.60 | [4631.04; 10723.84] | 0.00058442 | 0.840 | [0.730; 0.927] | 0.667 | 0.900 | 0.870 | 0.730 |
| Inv_Cluster_p_e_nd__ep_b2_d1_avg    | 0.03    | [0.03; 0.03]       | 0.03    | [0.03; 0.03]        | 0.00011863 | 0.839 | [0.730; 0.928] | 0.733 | 0.833 | 0.815 | 0.758 |
| Inv_Cluster_d_e__ep_b32_d1_avg      | 0.48    | [0.47; 0.50]       | 0.45    | [0.43; 0.47]        | 0.00004147 | 0.839 | [0.727; 0.934] | 1.000 | 0.600 | 0.714 | 1.000 |
| Sum_energy__ep_b32_d2_avg           | 0.58    | [0.54; 0.62]       | 0.66    | [0.61; 0.73]        | 0.00012438 | 0.839 | [0.730; 0.928] | 0.900 | 0.633 | 0.711 | 0.864 |
| Cluster_s_s__ep_b32_d3_avg          | 83.34   | [74.55; 125.21]    | 146.22  | [119.65; 246.32]    | 0.00067158 | 0.839 | [0.728; 0.927] | 0.667 | 0.900 | 0.870 | 0.730 |
| Variance_s__ep_b32_d3_avg           | 0.56    | [0.51; 0.81]       | 0.96    | [0.76; 1.47]        | 0.00111326 | 0.839 | [0.729; 0.927] | 0.600 | 1.000 | 1.000 | 0.714 |
| Contrast__ep_b2_d1_avg              | 0.23    | [0.21; 0.26]       | 0.28    | [0.27; 0.32]        | 0.00026917 | 0.838 | [0.723; 0.934] | 0.867 | 0.767 | 0.788 | 0.852 |
| Homogeneity2__ep_b2_d1_avg          | 0.88    | [0.87; 0.89]       | 0.86    | [0.84; 0.86]        | 0.00026917 | 0.838 | [0.723; 0.933] | 0.867 | 0.767 | 0.788 | 0.852 |
| Homogeneity2_nd__ep_b2_d1_avg       | 0.12    | [0.11; 0.13]       | 0.14    | [0.14; 0.16]        | 0.00026917 | 0.838 | [0.724; 0.931] | 0.867 | 0.767 | 0.788 | 0.852 |
| Dissimilarity__ep_b2_d1_avg         | 0.23    | [0.21; 0.26]       | 0.28    | [0.27; 0.32]        | 0.00026917 | 0.838 | [0.724; 0.931] | 0.867 | 0.767 | 0.788 | 0.852 |
| Homogeneity1__ep_b2_d1_avg          | 0.88    | [0.87; 0.89]       | 0.86    | [0.84; 0.86]        | 0.00026917 | 0.838 | [0.722; 0.932] | 0.867 | 0.767 | 0.788 | 0.852 |
| Homogeneity1_nd__ep_b2_d1_avg       | 0.12    | [0.11; 0.13]       | 0.14    | [0.14; 0.16]        | 0.00026917 | 0.838 | [0.726; 0.933] | 0.867 | 0.767 | 0.788 | 0.852 |
| DMN__ep_b2_d1_avg                   | 0.06    | [0.05; 0.06]       | 0.07    | [0.07; 0.08]        | 0.00026917 | 0.838 | [0.723; 0.933] | 0.867 | 0.767 | 0.788 | 0.852 |
| IDMN__ep_b2_d1_avg                  | 0.95    | [0.95; 0.96]       | 0.94    | [0.94; 0.95]        | 0.00026917 | 0.838 | [0.722; 0.934] | 0.867 | 0.767 | 0.788 | 0.852 |
| IDMN_nd__ep_b2_d1_avg               | 0.19    | [0.17; 0.20]       | 0.23    | [0.22; 0.25]        | 0.00026917 | 0.838 | [0.723; 0.931] | 0.867 | 0.767 | 0.788 | 0.852 |
| DN__ep_b2_d1_avg                    | 0.12    | [0.11; 0.13]       | 0.14    | [0.14; 0.16]        | 0.00026917 | 0.838 | [0.724; 0.932] | 0.867 | 0.767 | 0.788 | 0.852 |
| IDN__ep_b2_d1_avg                   | 0.92    | [0.91; 0.93]       | 0.91    | [0.89; 0.91]        | 0.00026917 | 0.838 | [0.722; 0.932] | 0.867 | 0.767 | 0.788 | 0.852 |
| IDN_nd__ep_b2_d1_avg                | 0.16    | [0.14; 0.17]       | 0.19    | [0.18; 0.21]        | 0.00026917 | 0.838 | [0.722; 0.931] | 0.867 | 0.767 | 0.788 | 0.852 |

|                                     |      |              |      |              |            |       |                |       |       |       |       |
|-------------------------------------|------|--------------|------|--------------|------------|-------|----------------|-------|-------|-------|-------|
| Autocorrelation_nd_ep_b2_d1_avg     | 0.47 | [0.43; 0.51] | 0.57 | [0.54; 0.63] | 0.00026917 | 0.838 | [0.724; 0.931] | 0.867 | 0.767 | 0.788 | 0.852 |
| Inv_autocorrelation_nd_ep_b2_d1_avg | 0.12 | [0.11; 0.13] | 0.14 | [0.14; 0.16] | 0.00026917 | 0.838 | [0.727; 0.933] | 0.867 | 0.767 | 0.788 | 0.852 |
| Gauss_nd_ep_b2_d1_avg               | 0.14 | [0.13; 0.15] | 0.17 | [0.16; 0.19] | 0.00026917 | 0.838 | [0.721; 0.933] | 0.867 | 0.767 | 0.788 | 0.852 |
| Gauss_lp_nd_ep_b2_d1_avg            | 0.09 | [0.08; 0.09] | 0.10 | [0.10; 0.12] | 0.00026917 | 0.838 | [0.724; 0.937] | 0.867 | 0.767 | 0.788 | 0.852 |
| Gauss_lf_nd_ep_b2_d1_avg            | 0.09 | [0.08; 0.09] | 0.10 | [0.10; 0.12] | 0.00026917 | 0.838 | [0.724; 0.933] | 0.867 | 0.767 | 0.788 | 0.852 |
| Gauss_rf_nd_ep_b2_d1_avg            | 0.09 | [0.08; 0.09] | 0.10 | [0.10; 0.12] | 0.00026917 | 0.838 | [0.726; 0.934] | 0.867 | 0.767 | 0.788 | 0.852 |
| Gauss_rp_nd_ep_b2_d1_avg            | 0.09 | [0.08; 0.09] | 0.10 | [0.10; 0.12] | 0.00026917 | 0.838 | [0.727; 0.931] | 0.867 | 0.767 | 0.788 | 0.852 |
| Inv_Gauss_nd_ep_b2_d1_avg           | 0.39 | [0.35; 0.42] | 0.47 | [0.45; 0.52] | 0.00026917 | 0.838 | [0.723; 0.933] | 0.867 | 0.767 | 0.788 | 0.852 |
| Inv_Gauss_lp_nd_ep_b2_d1_avg        | 0.64 | [0.58; 0.69] | 0.77 | [0.73; 0.86] | 0.00026917 | 0.838 | [0.724; 0.932] | 0.867 | 0.767 | 0.788 | 0.852 |
| Inv_Gauss_lf_nd_ep_b2_d1_avg        | 0.64 | [0.58; 0.69] | 0.77 | [0.73; 0.86] | 0.00026917 | 0.838 | [0.723; 0.934] | 0.867 | 0.767 | 0.788 | 0.852 |
| Inv_Gauss_rf_nd_ep_b2_d1_avg        | 0.64 | [0.58; 0.69] | 0.77 | [0.73; 0.86] | 0.00026917 | 0.838 | [0.721; 0.934] | 0.867 | 0.767 | 0.788 | 0.852 |
| Inv_Gauss_rp_nd_ep_b2_d1_avg        | 0.64 | [0.58; 0.69] | 0.77 | [0.73; 0.86] | 0.00026917 | 0.838 | [0.721; 0.932] | 0.867 | 0.767 | 0.788 | 0.852 |
| Gauss_2f_ep_b2_d1_avg               | 1.04 | [1.03; 1.05] | 1.02 | [1.01; 1.03] | 0.00026917 | 0.838 | [0.727; 0.934] | 0.867 | 0.767 | 0.788 | 0.852 |
| Gauss_2f_nd_ep_b2_d1_avg            | 0.17 | [0.16; 0.19] | 0.21 | [0.20; 0.23] | 0.00026917 | 0.838 | [0.726; 0.933] | 0.867 | 0.767 | 0.788 | 0.852 |
| Inv_Gauss_2f_ep_b2_d1_avg           | 7.70 | [7.64; 7.76] | 7.55 | [7.46; 7.59] | 0.00026917 | 0.838 | [0.723; 0.933] | 0.867 | 0.767 | 0.788 | 0.852 |
| Inv_Gauss_2f_nd_ep_b2_d1_avg        | 1.27 | [1.16; 1.39] | 1.55 | [1.47; 1.71] | 0.00026917 | 0.838 | [0.721; 0.933] | 0.867 | 0.767 | 0.788 | 0.852 |
| Gauss_2p_ep_b2_d1_avg               | 1.04 | [1.03; 1.05] | 1.02 | [1.01; 1.03] | 0.00026917 | 0.838 | [0.726; 0.933] | 0.867 | 0.767 | 0.788 | 0.852 |
| Gauss_2p_nd_ep_b2_d1_avg            | 0.17 | [0.16; 0.19] | 0.21 | [0.20; 0.23] | 0.00026917 | 0.838 | [0.724; 0.933] | 0.867 | 0.767 | 0.788 | 0.852 |
| Inv_Gauss_2p_ep_b2_d1_avg           | 7.70 | [7.64; 7.76] | 7.55 | [7.46; 7.59] | 0.00026917 | 0.838 | [0.721; 0.933] | 0.867 | 0.767 | 0.788 | 0.852 |
| Inv_Gauss_2p_nd_ep_b2_d1_avg        | 1.27 | [1.16; 1.39] | 1.55 | [1.47; 1.71] | 0.00026917 | 0.838 | [0.726; 0.933] | 0.867 | 0.767 | 0.788 | 0.852 |
| Inv_Cluster_d_e_ep_b2_d1_avg        | 0.87 | [0.85; 0.88] | 0.91 | [0.90; 0.92] | 0.00036272 | 0.838 | [0.727; 0.931] | 0.933 | 0.667 | 0.737 | 0.909 |
| Dif_average_ep_b2_d1_avg            | 0.23 | [0.21; 0.26] | 0.28 | [0.27; 0.32] | 0.00026917 | 0.838 | [0.723; 0.931] | 0.867 | 0.767 | 0.788 | 0.852 |
| Inv_dif_average_ep_b2_d1_avg        | 0.23 | [0.21; 0.26] | 0.28 | [0.27; 0.32] | 0.00026917 | 0.838 | [0.723; 0.934] | 0.867 | 0.767 | 0.788 | 0.852 |
| Mode_ep_b2_d1_avg                   | 0.12 | [0.11; 0.13] | 0.14 | [0.14; 0.16] | 0.00026917 | 0.838 | [0.723; 0.932] | 0.867 | 0.767 | 0.788 | 0.852 |
| High_notch_ep_b4_d1_avg             | 0.11 | [0.10; 0.11] | 0.10 | [0.09; 0.10] | 0.00030923 | 0.838 | [0.721; 0.932] | 0.833 | 0.833 | 0.833 | 0.833 |

|                                     |       |                |       |                |            |       |                |       |       |       |       |
|-------------------------------------|-------|----------------|-------|----------------|------------|-------|----------------|-------|-------|-------|-------|
| IQR__ep_b8_d1_avg                   | 0.02  | [0.02; 0.02]   | 0.01  | [0.01; 0.02]   | 0.00074011 | 0.838 | [0.723; 0.933] | 0.900 | 0.700 | 0.750 | 0.875 |
| Sum_energy__ep_b16_d1_avg           | 0.54  | [0.52; 0.55]   | 0.57  | [0.55; 0.62]   | 0.00007671 | 0.838 | [0.726; 0.929] | 0.967 | 0.667 | 0.744 | 0.952 |
| Cluster_t_s_nd__ep_b32_d3_avg       | 1.82  | [1.69; 2.62]   | 3.18  | [2.56; 4.90]   | 0.00109577 | 0.838 | [0.729; 0.927] | 0.600 | 1.000 | 1.000 | 0.714 |
| Inv_Cluster_d_e_nd__ep_b32_d3_avg   | 0.39  | [0.37; 0.41]   | 0.35  | [0.32; 0.37]   | 0.00005582 | 0.838 | [0.732; 0.923] | 0.667 | 0.833 | 0.800 | 0.714 |
| Inv_Cluster_s_s_nd__ep_b2_d1_avg    | 0.00  | [0.00; 0.00]   | 0.00  | [0.00; 0.00]   | 0.00019995 | 0.837 | [0.724; 0.931] | 0.967 | 0.633 | 0.725 | 0.950 |
| Geo_mean3__ep_b2_d1_avg             | 0.21  | [0.20; 0.21]   | 0.22  | [0.22; 0.23]   | 0.00027511 | 0.837 | [0.719; 0.930] | 0.800 | 0.767 | 0.774 | 0.793 |
| Mn_AD_md__ep_b2_d1_avg              | 0.13  | [0.12; 0.14]   | 0.11  | [0.09; 0.11]   | 0.00028230 | 0.837 | [0.719; 0.931] | 0.867 | 0.767 | 0.788 | 0.852 |
| Md_AD_mn__ep_b2_d1_avg              | 0.13  | [0.12; 0.14]   | 0.11  | [0.09; 0.11]   | 0.00028230 | 0.837 | [0.722; 0.934] | 0.867 | 0.767 | 0.788 | 0.852 |
| Inv_autocorrelation_e__ep_b2_d1_avg | 1.01  | [0.99; 1.02]   | 1.05  | [1.03; 1.07]   | 0.00025896 | 0.836 | [0.723; 0.926] | 0.800 | 0.767 | 0.774 | 0.793 |
| Geo_mean__ep_b2_d1_avg              | 0.10  | [0.10; 0.11]   | 0.11  | [0.11; 0.12]   | 0.00026838 | 0.836 | [0.727; 0.930] | 0.767 | 0.800 | 0.793 | 0.774 |
| Geo_mean2__ep_b2_d1_avg             | 0.10  | [0.10; 0.11]   | 0.11  | [0.11; 0.12]   | 0.00026838 | 0.836 | [0.723; 0.930] | 0.767 | 0.800 | 0.793 | 0.774 |
| Gauss_2f__ep_b4_d1_avg              | 0.92  | [0.92; 0.93]   | 0.90  | [0.89; 0.91]   | 0.00034678 | 0.836 | [0.721; 0.933] | 0.767 | 0.833 | 0.821 | 0.781 |
| Gauss_2f__ep_b16_d1_avg             | 0.85  | [0.84; 0.86]   | 0.82  | [0.80; 0.84]   | 0.00034530 | 0.836 | [0.720; 0.933] | 0.767 | 0.800 | 0.793 | 0.774 |
| Inv_Cluster_t_s_nd__ep_b2_d1_avg    | 0.01  | [0.00; 0.01]   | 0.01  | [0.01; 0.01]   | 0.00021605 | 0.834 | [0.719; 0.930] | 0.833 | 0.767 | 0.781 | 0.821 |
| Mn_AD_mn__ep_b2_d1_avg              | 0.13  | [0.12; 0.14]   | 0.11  | [0.09; 0.12]   | 0.00026282 | 0.834 | [0.720; 0.929] | 0.900 | 0.700 | 0.750 | 0.875 |
| Inv_Cluster_d_e__ep_b16_d2_avg      | 0.68  | [0.65; 0.70]   | 0.63  | [0.60; 0.65]   | 0.00004456 | 0.834 | [0.723; 0.929] | 0.867 | 0.700 | 0.743 | 0.840 |
| Cluster_s_s_nd__ep_b16_d3_avg       | 26.11 | [23.20; 33.05] | 36.59 | [29.45; 50.76] | 0.00041754 | 0.834 | [0.727; 0.922] | 0.633 | 0.900 | 0.864 | 0.711 |
| Correlation__ep_b2_d1_avg           | 0.52  | [0.47; 0.56]   | 0.42  | [0.36; 0.45]   | 0.00034132 | 0.833 | [0.719; 0.931] | 0.900 | 0.767 | 0.794 | 0.885 |
| Min__ep_b2_d1_avg                   | 0.12  | [0.11; 0.13]   | 0.14  | [0.14; 0.16]   | 0.00030375 | 0.833 | [0.719; 0.930] | 0.867 | 0.767 | 0.788 | 0.852 |
| Low_notch__ep_b8_d1_avg             | -0.02 | [-0.02; -0.02] | -0.01 | [-0.02; -0.01] | 0.00080425 | 0.833 | [0.718; 0.931] | 0.933 | 0.700 | 0.757 | 0.913 |
| Sum_energy__ep_b16_d2_avg           | 0.58  | [0.55; 0.61]   | 0.65  | [0.61; 0.69]   | 0.00010014 | 0.833 | [0.723; 0.924] | 0.967 | 0.600 | 0.707 | 0.947 |
| Gauss_2f__ep_b32_d1_avg             | 0.84  | [0.83; 0.85]   | 0.81  | [0.79; 0.83]   | 0.00032886 | 0.833 | [0.720; 0.931] | 0.967 | 0.600 | 0.707 | 0.947 |
| Gauss_e__ep_b2_d1_avg               | 1.07  | [1.04; 1.08]   | 1.11  | [1.09; 1.14]   | 0.00024153 | 0.832 | [0.717; 0.922] | 0.767 | 0.800 | 0.793 | 0.774 |
| Inv_Gauss_e__ep_b2_d1_avg           | 2.90  | [2.84; 2.95]   | 3.03  | [2.96; 3.09]   | 0.00024153 | 0.832 | [0.721; 0.926] | 0.767 | 0.800 | 0.793 | 0.774 |
| Cluster_d_nd__ep_b2_d1_avg          | 0.53  | [0.49; 0.59]   | 0.65  | [0.61; 0.70]   | 0.00033591 | 0.831 | [0.712; 0.930] | 0.900 | 0.700 | 0.750 | 0.875 |

|                                 |       |                |       |                |            |       |                |       |       |       |       |
|---------------------------------|-------|----------------|-------|----------------|------------|-------|----------------|-------|-------|-------|-------|
| Cluster_d_e_nd_ep_b2_d1_avg     | 1.63  | [1.57; 1.73]   | 1.80  | [1.74; 1.86]   | 0.00048968 | 0.831 | [0.714; 0.930] | 0.933 | 0.700 | 0.757 | 0.913 |
| Inv_Cluster_d_s_nd_ep_b2_d1_avg | 0.01  | [0.01; 0.01]   | 0.02  | [0.02; 0.02]   | 0.00023539 | 0.831 | [0.718; 0.929] | 0.833 | 0.767 | 0.781 | 0.821 |
| Low_notch_ep_b2_d1_avg          | -0.24 | [-0.27; -0.20] | -0.14 | [-0.18; -0.09] | 0.00055495 | 0.831 | [0.710; 0.931] | 0.833 | 0.800 | 0.806 | 0.828 |
| Gauss_lp_e_ep_b32_d2_avg        | 2.04  | [1.89; 2.25]   | 1.73  | [1.55; 1.94]   | 0.00006297 | 0.831 | [0.719; 0.922] | 0.900 | 0.633 | 0.711 | 0.864 |
| Gauss_lp_e_ep_b2_d1_avg         | 0.86  | [0.84; 0.87]   | 0.89  | [0.87; 0.90]   | 0.00028006 | 0.830 | [0.720; 0.921] | 0.800 | 0.767 | 0.774 | 0.793 |
| Gauss_lf_e_ep_b2_d1_avg         | 0.86  | [0.84; 0.87]   | 0.89  | [0.87; 0.90]   | 0.00028006 | 0.830 | [0.718; 0.922] | 0.800 | 0.767 | 0.774 | 0.793 |
| Inv_Gauss_rf_e_ep_b2_d1_avg     | 6.33  | [6.20; 6.40]   | 6.56  | [6.45; 6.62]   | 0.00028006 | 0.830 | [0.718; 0.922] | 0.800 | 0.767 | 0.774 | 0.793 |
| Inv_Gauss_rp_e_ep_b2_d1_avg     | 6.33  | [6.20; 6.40]   | 6.56  | [6.45; 6.62]   | 0.00028006 | 0.830 | [0.717; 0.924] | 0.800 | 0.767 | 0.774 | 0.793 |
| Gauss_lf_e_nd_ep_b32_d2_avg     | 3.87  | [3.62; 3.99]   | 3.38  | [2.99; 3.70]   | 0.00007989 | 0.830 | [0.720; 0.918] | 1.000 | 0.533 | 0.682 | 1.000 |
| Inv_Cluster_d_e_ep_b32_d3_avg   | 0.42  | [0.39; 0.44]   | 0.37  | [0.34; 0.39]   | 0.00007517 | 0.830 | [0.722; 0.921] | 0.767 | 0.733 | 0.742 | 0.759 |
| Homogeneity2_s_ep_b2_d1_avg     | 0.31  | [0.31; 0.33]   | 0.29  | [0.27; 0.30]   | 0.00020625 | 0.829 | [0.719; 0.921] | 0.767 | 0.800 | 0.793 | 0.774 |
| Homogeneity1_s_ep_b2_d1_avg     | 0.31  | [0.31; 0.33]   | 0.29  | [0.27; 0.30]   | 0.00020625 | 0.829 | [0.717; 0.922] | 0.767 | 0.800 | 0.793 | 0.774 |
| IDMN_s_ep_b2_d1_avg             | 0.32  | [0.32; 0.34]   | 0.30  | [0.28; 0.31]   | 0.00021402 | 0.829 | [0.713; 0.922] | 0.900 | 0.633 | 0.711 | 0.864 |
| IDMN_e_ep_b2_d1_avg             | 1.62  | [1.59; 1.64]   | 1.68  | [1.64; 1.71]   | 0.00024368 | 0.829 | [0.718; 0.921] | 0.767 | 0.767 | 0.767 | 0.767 |
| Cluster_d_s_nd_ep_b2_d1_avg     | 0.07  | [0.05; 0.08]   | 0.10  | [0.08; 0.11]   | 0.00028662 | 0.829 | [0.708; 0.928] | 0.867 | 0.733 | 0.765 | 0.846 |
| Average_e_ep_b2_d1_avg          | 2.64  | [2.58; 2.68]   | 2.75  | [2.69; 2.81]   | 0.00024126 | 0.829 | [0.714; 0.923] | 1.000 | 0.567 | 0.698 | 1.000 |
| Gauss_lp_e_ep_b32_d3_avg        | 1.82  | [1.61; 2.00]   | 1.48  | [1.33; 1.65]   | 0.00010072 | 0.829 | [0.717; 0.919] | 0.967 | 0.533 | 0.674 | 0.941 |
| IDN_s_ep_b2_d1_avg              | 0.32  | [0.31; 0.34]   | 0.29  | [0.27; 0.31]   | 0.00020980 | 0.828 | [0.716; 0.921] | 0.767 | 0.767 | 0.767 | 0.767 |
| Gauss_2f_s_ep_b2_d1_avg         | 0.36  | [0.35; 0.38]   | 0.33  | [0.31; 0.35]   | 0.00020932 | 0.828 | [0.716; 0.921] | 0.767 | 0.767 | 0.767 | 0.767 |
| Inv_Gauss_2f_s_ep_b2_d1_avg     | 2.68  | [2.61; 2.81]   | 2.45  | [2.29; 2.59]   | 0.00020932 | 0.828 | [0.713; 0.921] | 0.767 | 0.767 | 0.767 | 0.767 |
| Gauss_2p_s_ep_b2_d1_avg         | 0.36  | [0.35; 0.38]   | 0.33  | [0.31; 0.35]   | 0.00020932 | 0.828 | [0.718; 0.921] | 0.767 | 0.767 | 0.767 | 0.767 |
| Inv_Gauss_2p_s_ep_b2_d1_avg     | 2.68  | [2.61; 2.81]   | 2.45  | [2.29; 2.59]   | 0.00020932 | 0.828 | [0.717; 0.920] | 0.767 | 0.767 | 0.767 | 0.767 |
| Cluster_s_s_nd_ep_b2_d1_avg     | 0.35  | [0.29; 0.41]   | 0.50  | [0.42; 0.57]   | 0.00036133 | 0.828 | [0.709; 0.926] | 0.900 | 0.700 | 0.750 | 0.875 |
| Variance_e_ep_b2_d1_avg         | 2.82  | [2.48; 2.97]   | 3.38  | [3.04; 3.76]   | 0.00022488 | 0.828 | [0.714; 0.923] | 0.767 | 0.800 | 0.793 | 0.774 |
| Contrast_ep_b4_d1_avg           | 0.87  | [0.82; 0.98]   | 1.10  | [1.04; 1.26]   | 0.00039608 | 0.828 | [0.704; 0.934] | 0.933 | 0.767 | 0.800 | 0.920 |



|                                        |      |              |      |              |            |       |                |       |       |       |       |
|----------------------------------------|------|--------------|------|--------------|------------|-------|----------------|-------|-------|-------|-------|
| DMN__ep_b4_d1_avg                      | 0.05 | [0.05; 0.06] | 0.07 | [0.06; 0.08] | 0.00039608 | 0.828 | [0.702; 0.934] | 0.933 | 0.767 | 0.800 | 0.920 |
| Gauss_lf_e__ep_b32_d3_avg              | 3.77 | [3.46; 4.04] | 3.23 | [2.84; 3.56] | 0.00007833 | 0.828 | [0.712; 0.917] | 1.000 | 0.500 | 0.667 | 1.000 |
| Contrast_s__ep_b2_d1_avg               | 0.03 | [0.02; 0.03] | 0.04 | [0.04; 0.05] | 0.00025863 | 0.827 | [0.708; 0.927] | 0.867 | 0.733 | 0.765 | 0.846 |
| Homogeneity2_s_nd__ep_b2_d1_avg        | 0.01 | [0.01; 0.02] | 0.02 | [0.02; 0.03] | 0.00025863 | 0.827 | [0.710; 0.926] | 0.867 | 0.733 | 0.765 | 0.846 |
| Dissimilarity_s__ep_b2_d1_avg          | 0.03 | [0.02; 0.03] | 0.04 | [0.04; 0.05] | 0.00025863 | 0.827 | [0.709; 0.926] | 0.867 | 0.733 | 0.765 | 0.846 |
| Homogeneity1_s_nd__ep_b2_d1_avg        | 0.01 | [0.01; 0.02] | 0.02 | [0.02; 0.03] | 0.00025863 | 0.827 | [0.708; 0.926] | 0.867 | 0.733 | 0.765 | 0.846 |
| DMN_s__ep_b2_d1_avg                    | 0.01 | [0.01; 0.01] | 0.01 | [0.01; 0.01] | 0.00025863 | 0.827 | [0.709; 0.926] | 0.867 | 0.733 | 0.765 | 0.846 |
| IDMN_s_nd__ep_b2_d1_avg                | 0.02 | [0.02; 0.03] | 0.03 | [0.03; 0.04] | 0.00025863 | 0.827 | [0.710; 0.927] | 0.867 | 0.733 | 0.765 | 0.846 |
| DN_s__ep_b2_d1_avg                     | 0.01 | [0.01; 0.02] | 0.02 | [0.02; 0.03] | 0.00025863 | 0.827 | [0.711; 0.927] | 0.867 | 0.733 | 0.765 | 0.846 |
| IDN_s_nd__ep_b2_d1_avg                 | 0.02 | [0.02; 0.02] | 0.03 | [0.02; 0.03] | 0.00025863 | 0.827 | [0.707; 0.923] | 0.867 | 0.733 | 0.765 | 0.846 |
| Autocorrelation_s_nd__ep_b2_d1_avg     | 0.06 | [0.05; 0.07] | 0.08 | [0.07; 0.10] | 0.00025863 | 0.827 | [0.711; 0.927] | 0.867 | 0.733 | 0.765 | 0.846 |
| Inv_autocorrelation_s_nd__ep_b2_d1_avg | 0.01 | [0.01; 0.02] | 0.02 | [0.02; 0.03] | 0.00025863 | 0.827 | [0.710; 0.927] | 0.867 | 0.733 | 0.765 | 0.846 |
| Gauss_s_nd__ep_b2_d1_avg               | 0.02 | [0.01; 0.02] | 0.03 | [0.02; 0.03] | 0.00025863 | 0.827 | [0.709; 0.924] | 0.867 | 0.733 | 0.765 | 0.846 |
| Gauss_lp_s_nd__ep_b2_d1_avg            | 0.01 | [0.01; 0.01] | 0.02 | [0.01; 0.02] | 0.00025863 | 0.827 | [0.711; 0.924] | 0.867 | 0.733 | 0.765 | 0.846 |
| Gauss_lf_s_nd__ep_b2_d1_avg            | 0.01 | [0.01; 0.01] | 0.02 | [0.01; 0.02] | 0.00025863 | 0.827 | [0.710; 0.926] | 0.867 | 0.733 | 0.765 | 0.846 |
| Gauss_rf_s_nd__ep_b2_d1_avg            | 0.01 | [0.01; 0.01] | 0.02 | [0.01; 0.02] | 0.00025863 | 0.827 | [0.710; 0.924] | 0.867 | 0.733 | 0.765 | 0.846 |
| Gauss_rp_s_nd__ep_b2_d1_avg            | 0.01 | [0.01; 0.01] | 0.02 | [0.01; 0.02] | 0.00025863 | 0.827 | [0.709; 0.926] | 0.867 | 0.733 | 0.765 | 0.846 |
| Inv_Gauss_s_nd__ep_b2_d1_avg           | 0.05 | [0.04; 0.06] | 0.07 | [0.06; 0.08] | 0.00025863 | 0.827 | [0.711; 0.923] | 0.867 | 0.733 | 0.765 | 0.846 |
| Inv_Gauss_lp_s_nd__ep_b2_d1_avg        | 0.08 | [0.06; 0.09] | 0.11 | [0.10; 0.14] | 0.00025863 | 0.827 | [0.708; 0.927] | 0.867 | 0.733 | 0.765 | 0.846 |
| Inv_Gauss_lf_s_nd__ep_b2_d1_avg        | 0.08 | [0.06; 0.09] | 0.11 | [0.10; 0.14] | 0.00025863 | 0.827 | [0.708; 0.923] | 0.867 | 0.733 | 0.765 | 0.846 |
| Inv_Gauss_rf_s_nd__ep_b2_d1_avg        | 0.08 | [0.06; 0.09] | 0.11 | [0.10; 0.14] | 0.00025863 | 0.827 | [0.707; 0.927] | 0.867 | 0.733 | 0.765 | 0.846 |
| Inv_Gauss_rp_s_nd__ep_b2_d1_avg        | 0.08 | [0.06; 0.09] | 0.11 | [0.10; 0.14] | 0.00025863 | 0.827 | [0.710; 0.923] | 0.867 | 0.733 | 0.765 | 0.846 |
| Gauss_2f_s_nd__ep_b2_d1_avg            | 0.02 | [0.02; 0.02] | 0.03 | [0.03; 0.04] | 0.00025863 | 0.827 | [0.708; 0.924] | 0.867 | 0.733 | 0.765 | 0.846 |
| Inv_Gauss_2f_s_nd__ep_b2_d1_avg        | 0.16 | [0.13; 0.18] | 0.23 | [0.20; 0.28] | 0.00025863 | 0.827 | [0.708; 0.924] | 0.867 | 0.733 | 0.765 | 0.846 |
| Gauss_2p_s_nd__ep_b2_d1_avg            | 0.02 | [0.02; 0.02] | 0.03 | [0.03; 0.04] | 0.00025863 | 0.827 | [0.707; 0.926] | 0.867 | 0.733 | 0.765 | 0.846 |

|                                 |        |                  |        |                   |            |       |                |       |       |       |       |
|---------------------------------|--------|------------------|--------|-------------------|------------|-------|----------------|-------|-------|-------|-------|
| Inv_Gauss_2p_s_nd__ep_b2_d1_avg | 0.16   | [0.13; 0.18]     | 0.23   | [0.20; 0.28]      | 0.00025863 | 0.827 | [0.710; 0.924] | 0.867 | 0.733 | 0.765 | 0.846 |
| Cluster_t_s_nd__ep_b2_d1_avg    | 0.15   | [0.12; 0.18]     | 0.22   | [0.19; 0.26]      | 0.00032041 | 0.827 | [0.711; 0.928] | 0.867 | 0.733 | 0.765 | 0.846 |
| Cluster_d_s_nd__ep_b16_d3_avg   | 0.07   | [0.07; 0.08]     | 0.09   | [0.08; 0.11]      | 0.00106986 | 0.827 | [0.714; 0.921] | 0.700 | 0.867 | 0.840 | 0.743 |
| Gauss_lp_e_nd__ep_b32_d3_avg    | 1.72   | [1.51; 1.86]     | 1.40   | [1.25; 1.56]      | 0.00009474 | 0.827 | [0.717; 0.917] | 0.967 | 0.533 | 0.674 | 0.941 |
| Dif_energy__ep_b2_d1_avg        | 0.00   | [0.00; 0.00]     | 0.00   | [0.00; 0.00]      | 0.00032839 | 0.826 | [0.710; 0.926] | 0.900 | 0.667 | 0.730 | 0.870 |
| Inv_dif_energy__ep_b2_d1_avg    | 0.00   | [0.00; 0.00]     | 0.00   | [0.00; 0.00]      | 0.00032839 | 0.826 | [0.709; 0.926] | 0.900 | 0.667 | 0.730 | 0.870 |
| Har_mean__ep_b8_d1_avg          | 0.00   | [0.00; 0.01]     | 0.01   | [0.01; 0.01]      | 0.00048208 | 0.826 | [0.711; 0.920] | 0.733 | 0.833 | 0.815 | 0.758 |
| High_notch__ep_b8_d1_avg        | 0.03   | [0.03; 0.03]     | 0.03   | [0.03; 0.03]      | 0.00093615 | 0.826 | [0.709; 0.927] | 0.767 | 0.833 | 0.821 | 0.781 |
| IMC2__ep_b8_d3_avg              | 0.30   | [0.28; 0.33]     | 0.36   | [0.33; 0.40]      | 0.00263154 | 0.826 | [0.712; 0.924] | 0.767 | 0.833 | 0.821 | 0.781 |
| Cluster_p_s_nd__ep_b16_d3_avg   | 588.24 | [510.88; 724.90] | 822.46 | [655.98; 1218.28] | 0.00054586 | 0.826 | [0.712; 0.917] | 0.633 | 0.867 | 0.826 | 0.703 |
| Gauss_lp_e_nd__ep_b32_d2_avg    | 1.90   | [1.75; 2.08]     | 1.64   | [1.45; 1.81]      | 0.00008702 | 0.826 | [0.716; 0.918] | 0.900 | 0.600 | 0.692 | 0.857 |
| Gauss_s__ep_b2_d1_avg           | 0.20   | [0.19; 0.21]     | 0.19   | [0.18; 0.19]      | 0.00022384 | 0.824 | [0.710; 0.918] | 1.000 | 0.500 | 0.667 | 1.000 |
| Inv_Gauss_s__ep_b2_d1_avg       | 0.54   | [0.53; 0.56]     | 0.50   | [0.48; 0.53]      | 0.00022384 | 0.824 | [0.710; 0.919] | 1.000 | 0.500 | 0.667 | 1.000 |
| Variance__ep_b2_d1_avg          | 0.03   | [0.02; 0.03]     | 0.02   | [0.01; 0.02]      | 0.00022384 | 0.824 | [0.712; 0.917] | 1.000 | 0.500 | 0.667 | 1.000 |
| Energy__ep_b2_d1_avg            | 0.33   | [0.32; 0.34]     | 0.31   | [0.29; 0.32]      | 0.00022384 | 0.824 | [0.712; 0.918] | 1.000 | 0.500 | 0.667 | 1.000 |
| Cluster_d_s__ep_b16_d3_avg      | 0.08   | [0.08; 0.10]     | 0.10   | [0.09; 0.13]      | 0.00070038 | 0.824 | [0.710; 0.918] | 0.667 | 0.900 | 0.870 | 0.730 |
| Average_s__ep_b16_d3_avg        | 0.04   | [0.04; 0.05]     | 0.05   | [0.05; 0.06]      | 0.00070354 | 0.824 | [0.709; 0.918] | 0.667 | 0.900 | 0.870 | 0.730 |
| Cluster_t_s_nd__ep_b32_d2_avg   | 1.70   | [1.55; 2.21]     | 2.39   | [2.06; 3.82]      | 0.00045036 | 0.824 | [0.710; 0.916] | 0.600 | 0.900 | 0.857 | 0.692 |
| Cluster_t_nd__ep_b2_d1_avg      | 1.22   | [1.12; 1.34]     | 1.47   | [1.36; 1.58]      | 0.00043194 | 0.823 | [0.704; 0.926] | 0.900 | 0.700 | 0.750 | 0.875 |
| RMS__ep_b2_d1_avg               | 0.29   | [0.28; 0.29]     | 0.28   | [0.27; 0.28]      | 0.00022007 | 0.823 | [0.709; 0.918] | 1.000 | 0.500 | 0.667 | 1.000 |
| IDMN__ep_b4_d1_avg              | 0.95   | [0.95; 0.96]     | 0.94   | [0.94; 0.95]      | 0.00043567 | 0.823 | [0.697; 0.931] | 0.933 | 0.733 | 0.778 | 0.917 |
| Sum_energy__ep_b8_d2_avg        | 0.62   | [0.58; 0.64]     | 0.68   | [0.63; 0.72]      | 0.00010531 | 0.823 | [0.708; 0.920] | 0.833 | 0.667 | 0.714 | 0.800 |
| Cluster_s_s__ep_b16_d3_avg      | 29.64  | [26.79; 35.93]   | 42.62  | [33.40; 60.35]    | 0.00038278 | 0.823 | [0.709; 0.914] | 0.533 | 0.967 | 0.941 | 0.674 |
| Gauss_lp_e__ep_b32_d1_avg       | 2.24   | [2.16; 2.33]     | 2.03   | [1.93; 2.16]      | 0.00008033 | 0.823 | [0.712; 0.917] | 0.933 | 0.600 | 0.700 | 0.900 |
| Cluster_p_s_nd__ep_b2_d1_avg    | 0.79   | [0.66; 0.94]     | 1.13   | [0.95; 1.32]      | 0.00041105 | 0.822 | [0.703; 0.923] | 0.900 | 0.700 | 0.750 | 0.875 |

|                                  |       |                |       |                |            |       |                |       |       |       |       |
|----------------------------------|-------|----------------|-------|----------------|------------|-------|----------------|-------|-------|-------|-------|
| Dissimilarity_e__ep_b4_d1_avg    | 2.75  | [2.64; 2.98]   | 3.21  | [3.06; 3.45]   | 0.00055431 | 0.822 | [0.690; 0.932] | 0.933 | 0.767 | 0.800 | 0.920 |
| DN_e__ep_b4_d1_avg               | 0.69  | [0.66; 0.74]   | 0.80  | [0.76; 0.86]   | 0.00055431 | 0.822 | [0.690; 0.933] | 0.933 | 0.767 | 0.800 | 0.920 |
| Dif_entropy__ep_b4_d1_avg        | 1.39  | [1.34; 1.46]   | 1.51  | [1.49; 1.57]   | 0.00061625 | 0.822 | [0.693; 0.934] | 0.933 | 0.767 | 0.800 | 0.920 |
| Gauss_lf_e_nd__ep_b32_d3_avg     | 3.60  | [3.31; 3.83]   | 3.11  | [2.73; 3.41]   | 0.00007677 | 0.822 | [0.709; 0.912] | 1.000 | 0.500 | 0.667 | 1.000 |
| IDN_e__ep_b2_d1_avg              | 1.52  | [1.50; 1.54]   | 1.57  | [1.54; 1.60]   | 0.00025156 | 0.821 | [0.708; 0.916] | 1.000 | 0.500 | 0.667 | 1.000 |
| Cluster_d_e__ep_b2_d1_avg        | 4.00  | [3.94; 4.08]   | 4.17  | [4.10; 4.21]   | 0.00060619 | 0.821 | [0.706; 0.922] | 0.933 | 0.633 | 0.718 | 0.905 |
| Contrast_e__ep_b4_d1_avg         | 4.18  | [3.80; 4.72]   | 5.25  | [5.00; 5.74]   | 0.00041853 | 0.821 | [0.692; 0.930] | 0.933 | 0.767 | 0.800 | 0.920 |
| DMN_e__ep_b4_d1_avg              | 0.26  | [0.24; 0.30]   | 0.33  | [0.31; 0.36]   | 0.00041853 | 0.821 | [0.696; 0.932] | 0.933 | 0.767 | 0.800 | 0.920 |
| Sum_energy__ep_b4_d2_avg         | 0.72  | [0.68; 0.73]   | 0.77  | [0.73; 0.81]   | 0.00013942 | 0.821 | [0.707; 0.917] | 0.767 | 0.733 | 0.742 | 0.759 |
| Contrast__ep_b8_d1_avg           | 3.32  | [3.01; 3.76]   | 4.28  | [3.89; 4.84]   | 0.00051908 | 0.821 | [0.693; 0.930] | 1.000 | 0.667 | 0.750 | 1.000 |
| DMN__ep_b8_d1_avg                | 0.05  | [0.05; 0.06]   | 0.07  | [0.06; 0.08]   | 0.00051908 | 0.821 | [0.693; 0.929] | 1.000 | 0.667 | 0.750 | 1.000 |
| Dif_entropy__ep_b8_d1_avg        | 2.13  | [2.06; 2.20]   | 2.28  | [2.24; 2.35]   | 0.00087352 | 0.821 | [0.688; 0.933] | 0.933 | 0.767 | 0.800 | 0.920 |
| Homogeneity2_e_nd__ep_b16_d1_avg | 1.25  | [1.22; 1.29]   | 1.14  | [1.09; 1.22]   | 0.00032285 | 0.821 | [0.698; 0.921] | 1.000 | 0.567 | 0.698 | 1.000 |
| Dif_variance__ep_b32_d1_avg      | 24.30 | [20.92; 28.13] | 32.58 | [30.08; 36.90] | 0.00049184 | 0.821 | [0.690; 0.933] | 0.933 | 0.767 | 0.800 | 0.920 |
| IDMN__ep_b8_d1_avg               | 0.96  | [0.95; 0.96]   | 0.94  | [0.94; 0.95]   | 0.00052552 | 0.820 | [0.694; 0.928] | 1.000 | 0.633 | 0.732 | 1.000 |
| Homogeneity1_nd__ep_b16_d1_avg   | 0.26  | [0.25; 0.26]   | 0.24  | [0.24; 0.25]   | 0.00029283 | 0.820 | [0.702; 0.920] | 1.000 | 0.567 | 0.698 | 1.000 |
| IDMN__ep_b16_d1_avg              | 0.96  | [0.95; 0.96]   | 0.95  | [0.94; 0.95]   | 0.00056161 | 0.820 | [0.694; 0.929] | 0.933 | 0.733 | 0.778 | 0.917 |
| Contrast__ep_b32_d1_avg          | 52.37 | [46.05; 58.34] | 67.21 | [60.51; 76.13] | 0.00053805 | 0.820 | [0.693; 0.930] | 1.000 | 0.633 | 0.732 | 1.000 |
| DMN__ep_b32_d1_avg               | 0.05  | [0.04; 0.06]   | 0.07  | [0.06; 0.07]   | 0.00053805 | 0.820 | [0.693; 0.928] | 1.000 | 0.633 | 0.732 | 1.000 |
| Gauss_rf_s__ep_b32_d2_avg        | 0.00  | [0.00; 0.00]   | 0.00  | [0.00; 0.00]   | 0.00038226 | 0.820 | [0.707; 0.911] | 0.833 | 0.633 | 0.694 | 0.792 |
| Cluster_d_s__ep_b32_d3_avg       | 0.06  | [0.05; 0.08]   | 0.09  | [0.07; 0.13]   | 0.00202400 | 0.820 | [0.703; 0.916] | 0.700 | 0.867 | 0.840 | 0.743 |
| Average_s__ep_b32_d3_avg         | 0.03  | [0.02; 0.04]   | 0.05  | [0.04; 0.07]   | 0.00202555 | 0.820 | [0.704; 0.917] | 0.700 | 0.867 | 0.840 | 0.743 |
| SD__ep_b2_d1_avg                 | 0.16  | [0.15; 0.17]   | 0.13  | [0.11; 0.15]   | 0.00022934 | 0.819 | [0.703; 0.912] | 1.000 | 0.500 | 0.667 | 1.000 |
| Uniformity__ep_b4_d3_avg         | 0.12  | [0.12; 0.12]   | 0.13  | [0.13; 0.14]   | 0.00063803 | 0.819 | [0.702; 0.921] | 0.767 | 0.767 | 0.767 | 0.767 |
| Inv_Cluster_d_e_nd__ep_b8_d3_avg | 0.70  | [0.69; 0.71]   | 0.68  | [0.66; 0.69]   | 0.00017600 | 0.819 | [0.704; 0.914] | 0.933 | 0.600 | 0.700 | 0.900 |

|                                     |       |                |        |                 |            |       |                |       |       |       |       |
|-------------------------------------|-------|----------------|--------|-----------------|------------|-------|----------------|-------|-------|-------|-------|
| Inv_dif_average__ep_b16_d1_avg      | 0.43  | [0.42; 0.43]   | 0.39   | [0.38; 0.42]    | 0.00036295 | 0.819 | [0.698; 0.923] | 0.767 | 0.800 | 0.793 | 0.774 |
| Gauss_rp_s_nd__ep_b16_d3_avg        | 0.00  | [0.00; 0.00]   | 0.00   | [0.00; 0.00]    | 0.00075244 | 0.819 | [0.707; 0.912] | 0.900 | 0.567 | 0.675 | 0.850 |
| Inv_Cluster_d_e_nd__ep_b16_d3_avg   | 0.57  | [0.55; 0.59]   | 0.53   | [0.51; 0.56]    | 0.00006433 | 0.819 | [0.704; 0.913] | 0.567 | 0.933 | 0.895 | 0.683 |
| IDMN__ep_b32_d1_avg                 | 0.96  | [0.95; 0.96]   | 0.95   | [0.94; 0.95]    | 0.00055927 | 0.819 | [0.691; 0.929] | 1.000 | 0.633 | 0.732 | 1.000 |
| Gauss_2f_e__ep_b2_d1_avg            | 1.71  | [1.68; 1.73]   | 1.77   | [1.73; 1.80]    | 0.00025348 | 0.818 | [0.706; 0.914] | 1.000 | 0.500 | 0.667 | 1.000 |
| Inv_Gauss_2f_e__ep_b2_d1_avg        | 12.65 | [12.44; 12.82] | 13.07  | [12.82; 13.28]  | 0.00025348 | 0.818 | [0.703; 0.916] | 1.000 | 0.500 | 0.667 | 1.000 |
| Gauss_2p_e__ep_b2_d1_avg            | 1.71  | [1.68; 1.73]   | 1.77   | [1.73; 1.80]    | 0.00025348 | 0.818 | [0.699; 0.912] | 1.000 | 0.500 | 0.667 | 1.000 |
| Inv_Gauss_2p_e__ep_b2_d1_avg        | 12.65 | [12.44; 12.82] | 13.07  | [12.82; 13.28]  | 0.00025348 | 0.818 | [0.704; 0.913] | 1.000 | 0.500 | 0.667 | 1.000 |
| Cluster_s_nd__ep_b2_d1_avg          | 2.78  | [2.59; 3.08]   | 3.32   | [3.09; 3.61]    | 0.00057232 | 0.818 | [0.697; 0.921] | 0.900 | 0.700 | 0.750 | 0.875 |
| Contrast__ep_b16_d1_avg             | 13.14 | [11.62; 14.72] | 16.84  | [15.23; 19.14]  | 0.00054155 | 0.818 | [0.689; 0.929] | 1.000 | 0.633 | 0.732 | 1.000 |
| DMN__ep_b16_d1_avg                  | 0.05  | [0.05; 0.06]   | 0.07   | [0.06; 0.07]    | 0.00054155 | 0.818 | [0.688; 0.926] | 1.000 | 0.633 | 0.732 | 1.000 |
| Inv_Gauss_lf_s_nd__ep_b32_d3_avg    | 0.02  | [0.02; 0.04]   | 0.05   | [0.03; 0.08]    | 0.00108584 | 0.818 | [0.704; 0.910] | 0.533 | 0.967 | 0.941 | 0.674 |
| IQR__ep_b2_d1_avg                   | 0.23  | [0.22; 0.26]   | 0.19   | [0.17; 0.21]    | 0.00078649 | 0.817 | [0.693; 0.921] | 0.833 | 0.800 | 0.806 | 0.828 |
| Inv_Cluster_d_e__ep_b8_d2_avg       | 0.89  | [0.88; 0.91]   | 0.85   | [0.82; 0.88]    | 0.00008946 | 0.817 | [0.702; 0.913] | 0.900 | 0.633 | 0.711 | 0.864 |
| Gauss_lp_e__ep_b16_d2_avg           | 1.83  | [1.69; 1.95]   | 1.56   | [1.43; 1.76]    | 0.00010507 | 0.817 | [0.703; 0.913] | 0.867 | 0.667 | 0.722 | 0.833 |
| Autocorrelation_s_nd__ep_b32_d2_avg | 0.39  | [0.35; 0.49]   | 0.56   | [0.46; 0.88]    | 0.00048820 | 0.817 | [0.702; 0.910] | 0.633 | 0.833 | 0.792 | 0.694 |
| Gauss_2f_e__ep_b32_d2_avg           | 7.08  | [6.74; 7.22]   | 6.56   | [6.22; 6.85]    | 0.00047812 | 0.817 | [0.696; 0.914] | 0.667 | 0.900 | 0.870 | 0.730 |
| Cluster_s_s_nd__ep_b32_d2_avg       | 71.09 | [61.94; 93.19] | 107.61 | [82.91; 181.04] | 0.00054312 | 0.817 | [0.702; 0.910] | 0.567 | 0.933 | 0.895 | 0.683 |
| Cluster_d_s_nd__ep_b32_d3_avg       | 0.05  | [0.05; 0.07]   | 0.09   | [0.07; 0.12]    | 0.00212885 | 0.817 | [0.700; 0.914] | 0.733 | 0.833 | 0.815 | 0.758 |
| Cluster_t_e_nd__ep_b2_d1_avg        | 3.72  | [3.59; 3.93]   | 4.09   | [3.95; 4.19]    | 0.00087824 | 0.816 | [0.693; 0.921] | 0.900 | 0.700 | 0.750 | 0.875 |
| Correlation_e__ep_b2_d1_avg         | 0.87  | [0.86; 0.87]   | 0.88   | [0.87; 0.89]    | 0.00031647 | 0.816 | [0.698; 0.911] | 1.000 | 0.500 | 0.667 | 1.000 |
| Mn_AD_md__ep_b4_d1_avg              | 0.04  | [0.03; 0.04]   | 0.03   | [0.03; 0.03]    | 0.00057022 | 0.816 | [0.691; 0.923] | 1.000 | 0.600 | 0.714 | 1.000 |
| Cluster_t_s_nd__ep_b8_d2_avg        | 1.01  | [0.92; 1.08]   | 1.15   | [1.06; 1.34]    | 0.00064150 | 0.816 | [0.698; 0.913] | 0.900 | 0.667 | 0.730 | 0.870 |
| Dif_variance__ep_b16_d1_avg         | 5.54  | [5.20; 6.28]   | 6.83   | [6.66; 7.78]    | 0.00057748 | 0.816 | [0.690; 0.926] | 0.900 | 0.767 | 0.794 | 0.885 |
| Sum_energy__ep_b32_d3_avg           | 0.65  | [0.61; 0.70]   | 0.75   | [0.71; 0.84]    | 0.00066772 | 0.814 | [0.698; 0.914] | 0.767 | 0.767 | 0.767 | 0.767 |

|                                  |        |                 |        |                  |            |       |                |       |       |       |       |
|----------------------------------|--------|-----------------|--------|------------------|------------|-------|----------------|-------|-------|-------|-------|
| Dif_entropy__ep_b16_d1_avg       | 2.97   | [2.90; 3.06]    | 3.15   | [3.09; 3.22]     | 0.00107351 | 0.813 | [0.687; 0.927] | 0.933 | 0.767 | 0.800 | 0.920 |
| Gauss_lf_e__ep_b16_d2_avg        | 3.36   | [3.19; 3.46]    | 3.04   | [2.73; 3.28]     | 0.00011152 | 0.813 | [0.697; 0.907] | 1.000 | 0.500 | 0.667 | 1.000 |
| Gauss_lp_e_nd__ep_b16_d3_avg     | 1.46   | [1.29; 1.56]    | 1.24   | [1.14; 1.36]     | 0.00014119 | 0.813 | [0.696; 0.910] | 0.533 | 0.967 | 0.941 | 0.674 |
| Inv_Cluster_d_e__ep_b16_d3_avg   | 0.64   | [0.61; 0.67]    | 0.60   | [0.56; 0.62]     | 0.00011185 | 0.813 | [0.701; 0.912] | 1.000 | 0.467 | 0.652 | 1.000 |
| Homogeneity2_e__ep_b2_d1_avg     | 1.40   | [1.38; 1.42]    | 1.44   | [1.42; 1.46]     | 0.00028432 | 0.812 | [0.696; 0.910] | 1.000 | 0.500 | 0.667 | 1.000 |
| Homogeneity1_e__ep_b2_d1_avg     | 1.40   | [1.38; 1.42]    | 1.44   | [1.42; 1.46]     | 0.00028432 | 0.812 | [0.694; 0.912] | 1.000 | 0.500 | 0.667 | 1.000 |
| Autocorrelation_e__ep_b2_d1_avg  | 4.04   | [3.98; 4.10]    | 4.19   | [4.11; 4.26]     | 0.00025560 | 0.812 | [0.694; 0.910] | 1.000 | 0.500 | 0.667 | 1.000 |
| Cluster_p_nd__ep_b2_d1_avg       | 6.34   | [5.92; 6.98]    | 7.58   | [7.02; 8.09]     | 0.00078079 | 0.812 | [0.689; 0.920] | 0.900 | 0.700 | 0.750 | 0.875 |
| Homogeneity2_e__ep_b8_d1_avg     | 2.56   | [2.52; 2.64]    | 2.43   | [2.32; 2.49]     | 0.00064257 | 0.812 | [0.689; 0.919] | 0.867 | 0.767 | 0.788 | 0.852 |
| Dissimilarity_e__ep_b8_d1_avg    | 8.19   | [7.79; 8.92]    | 9.66   | [8.91; 10.28]    | 0.00085316 | 0.812 | [0.683; 0.923] | 0.933 | 0.733 | 0.778 | 0.917 |
| DN_e__ep_b8_d1_avg               | 1.02   | [0.97; 1.12]    | 1.21   | [1.11; 1.28]     | 0.00085316 | 0.812 | [0.682; 0.923] | 0.933 | 0.733 | 0.778 | 0.917 |
| Dissimilarity__ep_b4_d1_avg      | 0.62   | [0.60; 0.66]    | 0.72   | [0.67; 0.79]     | 0.00069965 | 0.811 | [0.683; 0.920] | 0.967 | 0.667 | 0.744 | 0.952 |
| DN__ep_b4_d1_avg                 | 0.16   | [0.15; 0.16]    | 0.18   | [0.17; 0.20]     | 0.00069965 | 0.811 | [0.682; 0.919] | 0.967 | 0.667 | 0.744 | 0.952 |
| Correlation__ep_b4_d1_avg        | 0.63   | [0.59; 0.66]    | 0.53   | [0.50; 0.59]     | 0.00089093 | 0.811 | [0.682; 0.920] | 1.000 | 0.633 | 0.732 | 1.000 |
| Dif_average__ep_b4_d1_avg        | 0.62   | [0.60; 0.66]    | 0.72   | [0.67; 0.79]     | 0.00069965 | 0.811 | [0.680; 0.921] | 0.967 | 0.667 | 0.744 | 0.952 |
| Contrast_e__ep_b8_d1_avg         | 21.94  | [19.90; 25.56]  | 28.59  | [25.80; 31.01]   | 0.00068670 | 0.811 | [0.679; 0.924] | 0.933 | 0.733 | 0.778 | 0.917 |
| DMN_e__ep_b8_d1_avg              | 0.34   | [0.31; 0.40]    | 0.45   | [0.40; 0.48]     | 0.00068670 | 0.811 | [0.679; 0.926] | 0.933 | 0.733 | 0.778 | 0.917 |
| Cluster_d_s_nd__ep_b8_d2_avg     | 0.11   | [0.11; 0.12]    | 0.12   | [0.12; 0.13]     | 0.00063538 | 0.811 | [0.691; 0.913] | 0.667 | 0.900 | 0.870 | 0.730 |
| Gauss_lf_e_nd__ep_b16_d3_avg     | 2.92   | [2.70; 3.00]    | 2.56   | [2.38; 2.82]     | 0.00010129 | 0.811 | [0.690; 0.904] | 1.000 | 0.500 | 0.667 | 1.000 |
| Contrast_s__ep_b32_d1_avg        | 0.06   | [0.05; 0.07]    | 0.10   | [0.07; 0.13]     | 0.00127562 | 0.811 | [0.694; 0.911] | 0.733 | 0.833 | 0.815 | 0.758 |
| DMN_s__ep_b32_d1_avg             | 0.00   | [0.00; 0.00]    | 0.00   | [0.00; 0.00]     | 0.00127562 | 0.811 | [0.693; 0.911] | 0.733 | 0.833 | 0.815 | 0.758 |
| Gauss_lp_e__ep_b8_d2_avg         | 1.57   | [1.48; 1.65]    | 1.39   | [1.29; 1.52]     | 0.00014081 | 0.810 | [0.698; 0.907] | 0.900 | 0.567 | 0.675 | 0.850 |
| Contrast_e__ep_b16_d1_avg        | 108.91 | [97.41; 126.40] | 142.49 | [125.01; 155.56] | 0.00075693 | 0.810 | [0.680; 0.923] | 0.967 | 0.700 | 0.763 | 0.955 |
| Homogeneity2_nd__ep_b16_d1_avg   | 0.18   | [0.17; 0.18]    | 0.16   | [0.15; 0.17]     | 0.00047650 | 0.810 | [0.686; 0.921] | 0.867 | 0.733 | 0.765 | 0.846 |
| Homogeneity1_e_nd__ep_b16_d1_avg | 1.86   | [1.85; 1.89]    | 1.79   | [1.75; 1.86]     | 0.00028835 | 0.810 | [0.689; 0.908] | 0.933 | 0.600 | 0.700 | 0.900 |

|                                   |        |                  |         |                   |            |       |                |       |       |       |       |
|-----------------------------------|--------|------------------|---------|-------------------|------------|-------|----------------|-------|-------|-------|-------|
| DMN_e_ep_b16_d1_avg               | 0.43   | [0.38; 0.49]     | 0.56    | [0.49; 0.61]      | 0.00075693 | 0.810 | [0.679; 0.922] | 0.967 | 0.700 | 0.763 | 0.955 |
| Cluster_p_s_ep_b16_d3_avg         | 687.00 | [608.33; 822.64] | 1021.47 | [752.03; 1522.02] | 0.00059338 | 0.810 | [0.694; 0.906] | 0.867 | 0.600 | 0.684 | 0.818 |
| Dif_entropy_ep_b32_d1_avg         | 3.88   | [3.81; 3.97]     | 4.07    | [3.98; 4.14]      | 0.00154169 | 0.810 | [0.680; 0.922] | 0.933 | 0.733 | 0.778 | 0.917 |
| Dissimilarity_ep_b8_d1_avg        | 1.33   | [1.25; 1.41]     | 1.54    | [1.42; 1.67]      | 0.00074400 | 0.809 | [0.680; 0.919] | 0.967 | 0.667 | 0.744 | 0.952 |
| DN_ep_b8_d1_avg                   | 0.17   | [0.16; 0.18]     | 0.19    | [0.18; 0.21]      | 0.00074400 | 0.809 | [0.680; 0.921] | 0.967 | 0.667 | 0.744 | 0.952 |
| Dif_average_ep_b8_d1_avg          | 1.33   | [1.25; 1.41]     | 1.54    | [1.42; 1.67]      | 0.00074400 | 0.809 | [0.681; 0.920] | 0.967 | 0.667 | 0.744 | 0.952 |
| Autocorrelation_s_nd_ep_b8_d2_avg | 0.24   | [0.22; 0.25]     | 0.26    | [0.25; 0.31]      | 0.00138123 | 0.809 | [0.693; 0.910] | 0.900 | 0.667 | 0.730 | 0.870 |
| Gauss_lf_e_nd_ep_b8_d3_avg        | 1.99   | [1.91; 2.08]     | 1.87    | [1.76; 1.95]      | 0.00018147 | 0.809 | [0.696; 0.906] | 0.933 | 0.567 | 0.683 | 0.895 |
| Dissimilarity_ep_b16_d1_avg       | 2.71   | [2.53; 2.87]     | 3.11    | [2.87; 3.39]      | 0.00078434 | 0.809 | [0.679; 0.920] | 0.967 | 0.667 | 0.744 | 0.952 |
| DN_ep_b16_d1_avg                  | 0.17   | [0.16; 0.18]     | 0.19    | [0.18; 0.21]      | 0.00078434 | 0.809 | [0.684; 0.920] | 0.967 | 0.667 | 0.744 | 0.952 |
| Dif_average_ep_b16_d1_avg         | 2.71   | [2.53; 2.87]     | 3.11    | [2.87; 3.39]      | 0.00078434 | 0.809 | [0.679; 0.921] | 0.967 | 0.667 | 0.744 | 0.952 |
| Dissimilarity_ep_b32_d1_avg       | 5.44   | [5.08; 5.75]     | 6.24    | [5.77; 6.81]      | 0.00074720 | 0.809 | [0.681; 0.917] | 0.967 | 0.667 | 0.744 | 0.952 |
| DN_ep_b32_d1_avg                  | 0.17   | [0.16; 0.18]     | 0.20    | [0.18; 0.21]      | 0.00074720 | 0.809 | [0.677; 0.920] | 0.967 | 0.667 | 0.744 | 0.952 |
| Dif_average_ep_b32_d1_avg         | 5.44   | [5.08; 5.75]     | 6.24    | [5.77; 6.81]      | 0.00074720 | 0.809 | [0.681; 0.922] | 0.967 | 0.667 | 0.744 | 0.952 |
| Gauss_2f_e_nd_ep_b32_d2_avg       | 6.69   | [6.44; 6.82]     | 6.24    | [5.93; 6.52]      | 0.00059038 | 0.809 | [0.691; 0.909] | 0.733 | 0.800 | 0.786 | 0.750 |
| Homogeneity1_e_ep_b8_d1_avg       | 2.88   | [2.84; 2.93]     | 2.79    | [2.72; 2.84]      | 0.00063031 | 0.808 | [0.689; 0.910] | 0.767 | 0.767 | 0.767 | 0.767 |
| Inv_Cluster_t_e_nd_ep_b8_d3_avg   | 0.12   | [0.12; 0.13]     | 0.11    | [0.11; 0.12]      | 0.00023320 | 0.808 | [0.691; 0.907] | 0.967 | 0.500 | 0.659 | 0.938 |
| Dissimilarity_e_ep_b16_d1_avg     | 21.65  | [20.42; 23.29]   | 25.13   | [22.82; 26.55]    | 0.00113649 | 0.808 | [0.679; 0.922] | 1.000 | 0.633 | 0.732 | 1.000 |
| DN_e_ep_b16_d1_avg                | 1.35   | [1.28; 1.46]     | 1.57    | [1.43; 1.66]      | 0.00113649 | 0.808 | [0.678; 0.919] | 1.000 | 0.633 | 0.732 | 1.000 |
| Contrast_s_ep_b32_d2_avg          | 0.15   | [0.12; 0.22]     | 0.23    | [0.19; 0.32]      | 0.00307124 | 0.808 | [0.682; 0.911] | 0.700 | 0.933 | 0.913 | 0.757 |
| Homogeneity1_e_nd_ep_b32_d2_avg   | 1.52   | [1.44; 1.57]     | 1.39    | [1.31; 1.48]      | 0.00088722 | 0.808 | [0.687; 0.908] | 0.733 | 0.800 | 0.786 | 0.750 |
| DMN_s_ep_b32_d2_avg               | 0.00   | [0.00; 0.00]     | 0.00    | [0.00; 0.00]      | 0.00307124 | 0.808 | [0.683; 0.914] | 0.700 | 0.933 | 0.913 | 0.757 |
| Tri_mean_ep_b2_d1_avg             | 0.17   | [0.16; 0.18]     | 0.18    | [0.17; 0.19]      | 0.00025636 | 0.807 | [0.688; 0.904] | 0.867 | 0.667 | 0.722 | 0.833 |
| Mn_AD_mn_ep_b4_d1_avg             | 0.04   | [0.03; 0.04]     | 0.03    | [0.03; 0.03]      | 0.00078729 | 0.807 | [0.678; 0.918] | 1.000 | 0.600 | 0.714 | 1.000 |
| Gauss_rf_s_nd_ep_b8_d3_avg        | 0.00   | [0.00; 0.00]     | 0.01    | [0.00; 0.01]      | 0.00061390 | 0.807 | [0.690; 0.903] | 0.967 | 0.500 | 0.659 | 0.938 |

|                                    |       |               |       |                 |            |       |                |       |       |       |       |
|------------------------------------|-------|---------------|-------|-----------------|------------|-------|----------------|-------|-------|-------|-------|
| Cluster_d_s__ep_b8_d3_avg          | 0.15  | [0.14; 0.16]  | 0.17  | [0.15; 0.18]    | 0.00082661 | 0.807 | [0.693; 0.906] | 0.567 | 0.933 | 0.895 | 0.683 |
| Contrast_s__ep_b16_d1_avg          | 0.05  | [0.04; 0.05]  | 0.07  | [0.05; 0.08]    | 0.00056312 | 0.807 | [0.688; 0.907] | 0.733 | 0.800 | 0.786 | 0.750 |
| DMN_s__ep_b16_d1_avg               | 0.00  | [0.00; 0.00]  | 0.00  | [0.00; 0.00]    | 0.00056312 | 0.807 | [0.689; 0.908] | 0.733 | 0.800 | 0.786 | 0.750 |
| Gauss_lf_e__ep_b16_d3_avg          | 3.25  | [2.96; 3.31]  | 2.80  | [2.58; 3.08]    | 0.00013944 | 0.807 | [0.689; 0.902] | 1.000 | 0.500 | 0.667 | 1.000 |
| Cluster_d_s_nd__ep_b32_d2_avg      | 0.05  | [0.04; 0.06]  | 0.06  | [0.06; 0.09]    | 0.00087226 | 0.807 | [0.691; 0.906] | 0.700 | 0.833 | 0.808 | 0.735 |
| Cluster_s_e_nd__ep_b2_d1_avg       | 8.50  | [8.19; 8.91]  | 9.26  | [8.93; 9.54]    | 0.00174377 | 0.806 | [0.681; 0.914] | 0.867 | 0.733 | 0.765 | 0.846 |
| IDN__ep_b8_d1_avg                  | 0.87  | [0.87; 0.88]  | 0.86  | [0.84; 0.87]    | 0.00093098 | 0.806 | [0.677; 0.918] | 0.933 | 0.700 | 0.757 | 0.913 |
| Gauss_2f_e__ep_b16_d2_avg          | 5.90  | [5.77; 5.96]  | 5.63  | [5.44; 5.85]    | 0.00063737 | 0.806 | [0.684; 0.907] | 0.667 | 0.833 | 0.800 | 0.714 |
| Gauss_lp_e__ep_b16_d3_avg          | 1.64  | [1.46; 1.79]  | 1.40  | [1.27; 1.53]    | 0.00018975 | 0.806 | [0.692; 0.904] | 0.933 | 0.533 | 0.667 | 0.889 |
| Homogeneity1_e_nd__ep_b32_d1_avg   | 1.81  | [1.76; 1.86]  | 1.67  | [1.57; 1.76]    | 0.00068272 | 0.806 | [0.680; 0.908] | 0.767 | 0.800 | 0.793 | 0.774 |
| Inv_Gauss_lf_s__ep_b32_d3_avg      | 0.04  | [0.03; 0.04]  | 0.06  | [0.05; 0.11]    | 0.00095605 | 0.806 | [0.687; 0.906] | 0.800 | 0.767 | 0.774 | 0.793 |
| Inv_dif_variance__ep_b2_d1_avg     | 11.71 | [6.68; 18.45] | 30.96 | [17.65; 127.28] | 0.31728832 | 0.804 | [0.682; 0.911] | 0.900 | 0.633 | 0.711 | 0.864 |
| Inv_Gauss_e_nd__ep_b4_d1_avg       | 4.12  | [3.97; 4.36]  | 4.67  | [4.36; 4.91]    | 0.00103725 | 0.804 | [0.676; 0.919] | 0.967 | 0.700 | 0.763 | 0.955 |
| Gauss_lp_e_nd__ep_b8_d3_avg        | 1.11  | [1.03; 1.19]  | 1.00  | [0.92; 1.07]    | 0.00020773 | 0.804 | [0.688; 0.900] | 0.967 | 0.467 | 0.644 | 0.933 |
| Gauss_lf_e__ep_b8_d3_avg           | 2.50  | [2.31; 2.55]  | 2.22  | [2.10; 2.41]    | 0.00026051 | 0.804 | [0.684; 0.902] | 1.000 | 0.500 | 0.667 | 1.000 |
| Average_s__ep_b8_d3_avg            | 0.07  | [0.07; 0.08]  | 0.08  | [0.08; 0.09]    | 0.00086817 | 0.804 | [0.688; 0.904] | 0.567 | 0.933 | 0.895 | 0.683 |
| IDN__ep_b4_d1_avg                  | 0.88  | [0.88; 0.89]  | 0.87  | [0.86; 0.88]    | 0.00092975 | 0.803 | [0.674; 0.916] | 0.900 | 0.733 | 0.771 | 0.880 |
| Autocorrelation_s_nd__ep_b8_d3_avg | 0.24  | [0.22; 0.27]  | 0.29  | [0.26; 0.32]    | 0.00107192 | 0.803 | [0.684; 0.901] | 0.900 | 0.567 | 0.675 | 0.850 |
| Cluster_t_s_nd__ep_b16_d2_avg      | 1.25  | [1.14; 1.34]  | 1.51  | [1.28; 1.81]    | 0.00082373 | 0.803 | [0.684; 0.900] | 0.933 | 0.600 | 0.700 | 0.900 |
| Gauss_e_nd__ep_b4_d1_avg           | 1.19  | [1.15; 1.22]  | 1.27  | [1.23; 1.32]    | 0.00162978 | 0.802 | [0.672; 0.914] | 0.900 | 0.733 | 0.771 | 0.880 |
| Gauss_lp_e__ep_b4_d2_avg           | 1.31  | [1.26; 1.35]  | 1.21  | [1.14; 1.30]    | 0.00014855 | 0.802 | [0.684; 0.899] | 1.000 | 0.467 | 0.652 | 1.000 |
| Gauss_lf_e__ep_b4_d3_avg           | 1.73  | [1.64; 1.75]  | 1.61  | [1.56; 1.69]    | 0.00044460 | 0.802 | [0.680; 0.902] | 0.967 | 0.533 | 0.674 | 0.941 |
| Cluster_t_s_nd__ep_b8_d3_avg       | 1.08  | [0.99; 1.21]  | 1.26  | [1.16; 1.48]    | 0.00070981 | 0.802 | [0.684; 0.899] | 0.600 | 0.867 | 0.818 | 0.684 |
| Gauss_rp_s__ep_b16_d3_avg          | 0.00  | [0.00; 0.00]  | 0.00  | [0.00; 0.00]    | 0.00079455 | 0.802 | [0.684; 0.902] | 0.900 | 0.633 | 0.711 | 0.864 |
| Sum_energy__ep_b16_d3_avg          | 0.65  | [0.61; 0.69]  | 0.71  | [0.68; 0.76]    | 0.00049550 | 0.802 | [0.681; 0.904] | 0.800 | 0.700 | 0.727 | 0.778 |

|                               |         |                    |         |                    |            |       |                |       |       |       |       |
|-------------------------------|---------|--------------------|---------|--------------------|------------|-------|----------------|-------|-------|-------|-------|
| Variance_s__ep_b32_d2_avg     | 0.52    | [0.46; 0.68]       | 0.80    | [0.64; 1.28]       | 0.00047100 | 0.802 | [0.684; 0.899] | 0.933 | 0.500 | 0.651 | 0.882 |
| Homogeneity2_e__ep_b4_d1_avg  | 2.34    | [2.31; 2.35]       | 2.28    | [2.24; 2.32]       | 0.00067366 | 0.801 | [0.679; 0.907] | 0.667 | 0.867 | 0.833 | 0.722 |
| Contrast_s__ep_b8_d1_avg      | 0.04    | [0.04; 0.05]       | 0.05    | [0.05; 0.07]       | 0.00045913 | 0.801 | [0.677; 0.906] | 0.833 | 0.700 | 0.735 | 0.808 |
| DMN_s__ep_b8_d1_avg           | 0.00    | [0.00; 0.00]       | 0.00    | [0.00; 0.00]       | 0.00045913 | 0.801 | [0.676; 0.907] | 0.833 | 0.700 | 0.735 | 0.808 |
| Uniformity__ep_b16_d2_avg     | 0.08    | [0.06; 0.11]       | 0.13    | [0.11; 0.17]       | 0.00114574 | 0.801 | [0.680; 0.909] | 0.733 | 0.800 | 0.786 | 0.750 |
| Gauss_lf_e__ep_b32_d1_avg     | 4.12    | [4.01; 4.26]       | 3.93    | [3.56; 4.07]       | 0.00017479 | 0.801 | [0.681; 0.902] | 0.967 | 0.533 | 0.674 | 0.941 |
| Cluster_p_s_nd__ep_b32_d2_avg | 3297.66 | [2815.16; 4243.05] | 5156.04 | [3688.72; 8551.98] | 0.00091852 | 0.801 | [0.681; 0.898] | 0.533 | 0.933 | 0.889 | 0.667 |
| Homogeneity2__ep_b4_d1_avg    | 0.71    | [0.70; 0.73]       | 0.68    | [0.65; 0.70]       | 0.00103465 | 0.800 | [0.669; 0.913] | 0.933 | 0.667 | 0.737 | 0.909 |
| Cluster_d_e_nd__ep_b4_d1_avg  | 9.95    | [9.37; 10.29]      | 10.85   | [10.16; 11.50]     | 0.00143029 | 0.800 | [0.671; 0.911] | 0.933 | 0.633 | 0.718 | 0.905 |
| Tri_mean__ep_b4_d1_avg        | 0.04    | [0.04; 0.04]       | 0.05    | [0.04; 0.05]       | 0.00114398 | 0.800 | [0.677; 0.910] | 1.000 | 0.533 | 0.682 | 1.000 |
| Md_AD_md__ep_b8_d1_avg        | 0.01    | [0.01; 0.01]       | 0.01    | [0.01; 0.01]       | 0.00105766 | 0.800 | [0.680; 0.901] | 0.967 | 0.500 | 0.659 | 0.938 |
| MAD__ep_b8_d1_avg             | 0.01    | [0.01; 0.01]       | 0.01    | [0.01; 0.01]       | 0.00105766 | 0.800 | [0.681; 0.904] | 0.967 | 0.500 | 0.659 | 0.938 |
| Uniformity__ep_b8_d3_avg      | 0.06    | [0.05; 0.08]       | 0.09    | [0.08; 0.12]       | 0.00147930 | 0.800 | [0.676; 0.903] | 0.667 | 0.900 | 0.870 | 0.730 |
| IDN__ep_b32_d1_avg            | 0.87    | [0.86; 0.87]       | 0.85    | [0.84; 0.86]       | 0.00090753 | 0.800 | [0.670; 0.912] | 0.933 | 0.700 | 0.757 | 0.913 |
| Gauss_2f_e__ep_b32_d1_avg     | 7.61    | [7.46; 7.71]       | 7.29    | [6.99; 7.50]       | 0.00096657 | 0.800 | [0.680; 0.901] | 0.700 | 0.800 | 0.778 | 0.727 |

**GLRLM**

|                   |       |                |       |                |            |       |                |       |       |       |       |
|-------------------|-------|----------------|-------|----------------|------------|-------|----------------|-------|-------|-------|-------|
| SRLGLE__ep_b4_avg | 0.20  | [0.19; 0.21]   | 0.23  | [0.22; 0.27]   | 0.00001347 | 0.918 | [0.822; 0.996] | 1.000 | 0.867 | 0.882 | 1.000 |
| LRLGLE__ep_b2_avg | 6.34  | [5.35; 7.30]   | 3.56  | [2.95; 4.32]   | 0.00005396 | 0.894 | [0.799; 0.970] | 1.000 | 0.733 | 0.789 | 1.000 |
| LRE__ep_b2_avg    | 9.15  | [7.86; 10.58]  | 5.32  | [4.78; 6.27]   | 0.00008797 | 0.888 | [0.791; 0.962] | 0.933 | 0.767 | 0.800 | 0.920 |
| LRLGLE__ep_b4_avg | 1.65  | [1.48; 1.74]   | 1.13  | [0.99; 1.23]   | 0.00011617 | 0.888 | [0.778; 0.974] | 0.967 | 0.867 | 0.879 | 0.963 |
| SRLGLE__ep_b2_avg | 0.29  | [0.27; 0.31]   | 0.38  | [0.33; 0.44]   | 0.00004815 | 0.881 | [0.783; 0.957] | 0.900 | 0.767 | 0.794 | 0.885 |
| SRLGLE__ep_b8_avg | 0.12  | [0.11; 0.13]   | 0.14  | [0.13; 0.15]   | 0.00006380 | 0.879 | [0.769; 0.968] | 1.000 | 0.767 | 0.811 | 1.000 |
| LRE__ep_b4_avg    | 3.81  | [3.51; 4.34]   | 2.75  | [2.57; 3.21]   | 0.00034104 | 0.874 | [0.772; 0.957] | 1.000 | 0.733 | 0.789 | 1.000 |
| RP__ep_b2_avg     | 0.46  | [0.42; 0.49]   | 0.57  | [0.51; 0.60]   | 0.00006535 | 0.871 | [0.771; 0.951] | 1.000 | 0.667 | 0.750 | 1.000 |
| LRHGLE__ep_b2_avg | 19.67 | [16.78; 23.82] | 12.46 | [11.44; 14.13] | 0.00019445 | 0.870 | [0.768; 0.953] | 0.933 | 0.767 | 0.800 | 0.920 |



|                                  |       |                |       |                |            |       |                |       |       |       |       |
|----------------------------------|-------|----------------|-------|----------------|------------|-------|----------------|-------|-------|-------|-------|
| RP_ep_b4_avg                     | 0.64  | [0.60; 0.67]   | 0.73  | [0.69; 0.76]   | 0.00014208 | 0.859 | [0.751; 0.947] | 0.900 | 0.767 | 0.794 | 0.885 |
| LRE_ep_b8_avg                    | 2.14  | [1.98; 2.30]   | 1.77  | [1.66; 1.91]   | 0.00085685 | 0.854 | [0.742; 0.944] | 0.967 | 0.700 | 0.763 | 0.955 |
| LRLGLE_ep_b8_avg                 | 0.53  | [0.46; 0.56]   | 0.40  | [0.37; 0.44]   | 0.00048520 | 0.854 | [0.733; 0.957] | 0.933 | 0.800 | 0.824 | 0.923 |
| SRE_ep_b32_avg                   | 0.95  | [0.95; 0.96]   | 0.97  | [0.96; 0.97]   | 0.00029171 | 0.853 | [0.747; 0.942] | 1.000 | 0.633 | 0.732 | 1.000 |
| RP_ep_b8_avg                     | 0.79  | [0.76; 0.81]   | 0.83  | [0.82; 0.86]   | 0.00032175 | 0.852 | [0.740; 0.943] | 0.967 | 0.733 | 0.784 | 0.957 |
| SRE_ep_b8_avg                    | 0.85  | [0.83; 0.86]   | 0.89  | [0.87; 0.90]   | 0.00022819 | 0.851 | [0.740; 0.939] | 0.967 | 0.667 | 0.744 | 0.952 |
| SRE_ep_b4_avg                    | 0.74  | [0.70; 0.76]   | 0.81  | [0.76; 0.83]   | 0.00017530 | 0.844 | [0.737; 0.936] | 0.967 | 0.633 | 0.725 | 0.950 |
| SRE_ep_b16_avg                   | 0.91  | [0.91; 0.93]   | 0.94  | [0.93; 0.94]   | 0.00037202 | 0.844 | [0.731; 0.938] | 0.933 | 0.733 | 0.778 | 0.917 |
| LGLRE_ep_b8_avg                  | 0.16  | [0.16; 0.16]   | 0.17  | [0.17; 0.18]   | 0.00035794 | 0.833 | [0.710; 0.936] | 0.933 | 0.767 | 0.800 | 0.920 |
| LGLRE_ep_b32_avg                 | 0.04  | [0.04; 0.04]   | 0.05  | [0.04; 0.05]   | 0.00053183 | 0.833 | [0.718; 0.930] | 0.900 | 0.700 | 0.750 | 0.875 |
| SRE_ep_b2_avg                    | 0.59  | [0.53; 0.60]   | 0.68  | [0.60; 0.71]   | 0.00022688 | 0.832 | [0.719; 0.927] | 0.900 | 0.700 | 0.750 | 0.875 |
| RP_ep_b32_avg                    | 0.94  | [0.93; 0.94]   | 0.95  | [0.94; 0.96]   | 0.00053179 | 0.830 | [0.714; 0.927] | 1.000 | 0.567 | 0.698 | 1.000 |
| SRLGLE_ep_b32_avg                | 0.04  | [0.03; 0.04]   | 0.04  | [0.04; 0.04]   | 0.00041122 | 0.830 | [0.714; 0.927] | 0.933 | 0.667 | 0.737 | 0.909 |
| RP_ep_b16_avg                    | 0.88  | [0.87; 0.89]   | 0.91  | [0.89; 0.92]   | 0.00063217 | 0.829 | [0.712; 0.924] | 0.967 | 0.600 | 0.707 | 0.947 |
| LRHGLE_ep_b4_avg                 | 26.30 | [23.66; 31.66] | 19.99 | [19.00; 23.42] | 0.00191054 | 0.826 | [0.711; 0.920] | 0.900 | 0.667 | 0.730 | 0.870 |
| LRE_ep_b32_avg                   | 1.22  | [1.19; 1.27]   | 1.17  | [1.14; 1.20]   | 0.00109687 | 0.822 | [0.706; 0.919] | 0.867 | 0.733 | 0.765 | 0.846 |
| SRLGLE_ep_b16_avg                | 0.07  | [0.06; 0.07]   | 0.08  | [0.07; 0.08]   | 0.00057258 | 0.820 | [0.701; 0.924] | 0.867 | 0.767 | 0.788 | 0.852 |
| LRE_ep_b16_avg                   | 1.49  | [1.42; 1.57]   | 1.35  | [1.30; 1.41]   | 0.00147469 | 0.817 | [0.701; 0.918] | 0.800 | 0.767 | 0.774 | 0.793 |
| LRLGLE_ep_b16_avg                | 0.19  | [0.17; 0.21]   | 0.16  | [0.15; 0.18]   | 0.00067542 | 0.814 | [0.693; 0.914] | 0.933 | 0.633 | 0.718 | 0.905 |
| LRLGLE_ep_b32_avg                | 0.08  | [0.07; 0.09]   | 0.07  | [0.06; 0.08]   | 0.00061639 | 0.808 | [0.689; 0.906] | 0.700 | 0.833 | 0.808 | 0.735 |
| LGLRE_ep_b16_avg                 | 0.08  | [0.08; 0.09]   | 0.09  | [0.09; 0.09]   | 0.00161389 | 0.802 | [0.672; 0.912] | 0.833 | 0.800 | 0.806 | 0.828 |
| <b>Geometry based parameters</b> |       |                |       |                |            |       |                |       |       |       |       |
| s_ratio_to_all_2_ep_2            | 0.90  | [0.85; 0.96]   | 0.80  | [0.73; 0.84]   | 0.00006297 | 0.890 | [0.801; 0.960] | 0.833 | 0.833 | 0.833 | 0.833 |
| s_ratio_to_all_7_ep_8            | 0.40  | [0.36; 0.46]   | 0.31  | [0.27; 0.35]   | 0.00004832 | 0.888 | [0.796; 0.958] | 0.933 | 0.733 | 0.778 | 0.917 |
| s_ratio_to_all_22_ep_32          | 0.12  | [0.11; 0.14]   | 0.09  | [0.08; 0.10]   | 0.00005196 | 0.883 | [0.787; 0.959] | 0.767 | 0.900 | 0.885 | 0.794 |

|                          |      |              |      |              |            |       |                |       |       |       |       |
|--------------------------|------|--------------|------|--------------|------------|-------|----------------|-------|-------|-------|-------|
| s_ratio_to_all_14__ep_16 | 0.22 | [0.20; 0.25] | 0.17 | [0.14; 0.19] | 0.00006811 | 0.882 | [0.790; 0.954] | 0.833 | 0.833 | 0.833 | 0.833 |
| s_ratio_to_all_16__ep_32 | 0.11 | [0.10; 0.13] | 0.09 | [0.08; 0.10] | 0.00005204 | 0.882 | [0.789; 0.957] | 0.967 | 0.700 | 0.763 | 0.955 |
| s_ratio_to_all_11__ep_16 | 0.22 | [0.20; 0.26] | 0.17 | [0.16; 0.19] | 0.00006581 | 0.881 | [0.787; 0.958] | 0.767 | 0.867 | 0.852 | 0.788 |
| s_ratio_to_all_27__ep_32 | 0.11 | [0.11; 0.13] | 0.09 | [0.08; 0.10] | 0.00019188 | 0.876 | [0.777; 0.954] | 0.900 | 0.700 | 0.750 | 0.875 |
| s_ratio_to_all_25__ep_32 | 0.11 | [0.11; 0.14] | 0.09 | [0.08; 0.10] | 0.00004843 | 0.874 | [0.780; 0.949] | 0.667 | 0.933 | 0.909 | 0.737 |
| s_ratio_to_all_6__ep_8   | 0.40 | [0.37; 0.46] | 0.32 | [0.29; 0.35] | 0.00007621 | 0.871 | [0.772; 0.950] | 0.867 | 0.800 | 0.812 | 0.857 |
| s_ratio_to_all_8__ep_16  | 0.21 | [0.19; 0.26] | 0.17 | [0.15; 0.18] | 0.00008007 | 0.871 | [0.777; 0.948] | 0.867 | 0.767 | 0.788 | 0.852 |
| s_ratio_to_all_13__ep_16 | 0.22 | [0.20; 0.27] | 0.17 | [0.15; 0.20] | 0.00005517 | 0.870 | [0.772; 0.947] | 0.933 | 0.633 | 0.718 | 0.905 |
| s_ratio_to_all_28__ep_32 | 0.12 | [0.11; 0.14] | 0.09 | [0.08; 0.10] | 0.00004802 | 0.869 | [0.774; 0.946] | 0.800 | 0.800 | 0.800 | 0.800 |
| s_ratio_to_all_13__ep_32 | 0.11 | [0.10; 0.13] | 0.09 | [0.08; 0.10] | 0.00008194 | 0.868 | [0.764; 0.950] | 0.800 | 0.833 | 0.828 | 0.806 |
| s_ratio_to_all_7__ep_16  | 0.21 | [0.20; 0.26] | 0.17 | [0.15; 0.18] | 0.00011391 | 0.867 | [0.761; 0.952] | 0.833 | 0.833 | 0.833 | 0.833 |
| s_ratio_to_all_3__ep_4   | 0.65 | [0.61; 0.73] | 0.54 | [0.50; 0.59] | 0.00008614 | 0.864 | [0.767; 0.943] | 0.867 | 0.767 | 0.788 | 0.852 |
| s_ratio_to_all_10__ep_16 | 0.21 | [0.20; 0.26] | 0.17 | [0.15; 0.19] | 0.00011581 | 0.861 | [0.761; 0.944] | 0.767 | 0.867 | 0.852 | 0.788 |
| s_ratio_to_all_29__ep_32 | 0.11 | [0.10; 0.13] | 0.08 | [0.08; 0.10] | 0.00009006 | 0.860 | [0.760; 0.942] | 0.833 | 0.767 | 0.781 | 0.821 |
| s_ratio_to_all_12__ep_16 | 0.23 | [0.20; 0.26] | 0.17 | [0.15; 0.19] | 0.00011572 | 0.858 | [0.752; 0.940] | 0.833 | 0.800 | 0.806 | 0.828 |
| s_ratio_to_all_15__ep_16 | 0.22 | [0.19; 0.24] | 0.16 | [0.15; 0.18] | 0.00010811 | 0.858 | [0.751; 0.942] | 0.833 | 0.800 | 0.806 | 0.828 |
| s_ratio_to_all_14__ep_32 | 0.12 | [0.11; 0.13] | 0.09 | [0.08; 0.10] | 0.00021378 | 0.858 | [0.753; 0.948] | 0.900 | 0.733 | 0.771 | 0.880 |
| s_ratio_to_all_24__ep_32 | 0.12 | [0.11; 0.14] | 0.09 | [0.08; 0.10] | 0.00016338 | 0.857 | [0.754; 0.942] | 0.867 | 0.767 | 0.788 | 0.852 |
| s_ratio_to_all_4__ep_8   | 0.37 | [0.34; 0.45] | 0.30 | [0.28; 0.34] | 0.00013644 | 0.856 | [0.749; 0.940] | 0.833 | 0.767 | 0.781 | 0.821 |
| s_ratio_to_all_5__ep_8   | 0.39 | [0.36; 0.44] | 0.31 | [0.29; 0.35] | 0.00015322 | 0.856 | [0.754; 0.938] | 0.800 | 0.767 | 0.774 | 0.793 |
| s_ratio_to_all_4__ep_4   | 0.59 | [0.55; 0.65] | 0.48 | [0.41; 0.53] | 0.00019620 | 0.854 | [0.751; 0.938] | 0.800 | 0.767 | 0.774 | 0.793 |
| s_ratio_to_all_9__ep_16  | 0.21 | [0.19; 0.26] | 0.17 | [0.16; 0.19] | 0.00028789 | 0.854 | [0.747; 0.941] | 0.833 | 0.767 | 0.781 | 0.821 |
| s_ratio_to_all_20__ep_32 | 0.11 | [0.10; 0.14] | 0.09 | [0.07; 0.10] | 0.00015859 | 0.854 | [0.751; 0.939] | 0.867 | 0.733 | 0.765 | 0.846 |
| s_ratio_to_all_30__ep_32 | 0.11 | [0.10; 0.13] | 0.09 | [0.08; 0.10] | 0.00014978 | 0.853 | [0.754; 0.936] | 0.767 | 0.800 | 0.793 | 0.774 |
| s_ratio_to_all_21__ep_32 | 0.12 | [0.10; 0.14] | 0.09 | [0.08; 0.10] | 0.00021819 | 0.852 | [0.749; 0.939] | 0.833 | 0.767 | 0.781 | 0.821 |

|                          |      |              |      |              |            |       |                |       |       |       |       |
|--------------------------|------|--------------|------|--------------|------------|-------|----------------|-------|-------|-------|-------|
| s_ratio_to_all_15__ep_32 | 0.12 | [0.11; 0.14] | 0.09 | [0.08; 0.10] | 0.00021498 | 0.850 | [0.741; 0.937] | 0.800 | 0.767 | 0.774 | 0.793 |
| s_ratio_to_all_19__ep_32 | 0.11 | [0.10; 0.13] | 0.09 | [0.08; 0.10] | 0.00014215 | 0.849 | [0.742; 0.934] | 0.700 | 0.900 | 0.875 | 0.750 |
| s_ratio_to_all_26__ep_32 | 0.11 | [0.10; 0.15] | 0.09 | [0.08; 0.10] | 0.00013039 | 0.848 | [0.742; 0.933] | 0.967 | 0.567 | 0.690 | 0.944 |
| s_ratio_to_all_10__ep_32 | 0.11 | [0.10; 0.14] | 0.08 | [0.08; 0.10] | 0.00015899 | 0.844 | [0.737; 0.927] | 1.000 | 0.567 | 0.698 | 1.000 |
| s_ratio_to_all_3__ep_32  | 0.10 | [0.10; 0.13] | 0.08 | [0.08; 0.09] | 0.00014020 | 0.839 | [0.730; 0.932] | 0.767 | 0.867 | 0.852 | 0.788 |
| s_ratio_to_all_5__ep_32  | 0.11 | [0.10; 0.13] | 0.08 | [0.08; 0.10] | 0.00004671 | 0.839 | [0.732; 0.930] | 0.733 | 0.867 | 0.846 | 0.765 |
| s_ratio_to_all_2__ep_32  | 0.10 | [0.09; 0.12] | 0.08 | [0.07; 0.09] | 0.00023945 | 0.837 | [0.729; 0.927] | 0.933 | 0.600 | 0.700 | 0.900 |
| s_ratio_to_all_8__ep_32  | 0.12 | [0.10; 0.14] | 0.09 | [0.08; 0.10] | 0.00019267 | 0.837 | [0.728; 0.927] | 0.700 | 0.867 | 0.840 | 0.743 |
| s_ratio_to_all_31__ep_32 | 0.11 | [0.10; 0.13] | 0.08 | [0.07; 0.10] | 0.00025030 | 0.837 | [0.726; 0.927] | 0.800 | 0.767 | 0.774 | 0.793 |
| s_ratio_to_all_4__ep_16  | 0.20 | [0.18; 0.25] | 0.17 | [0.15; 0.18] | 0.00026688 | 0.832 | [0.719; 0.927] | 0.633 | 0.933 | 0.905 | 0.718 |
| s_ratio_to_all_5__ep_16  | 0.20 | [0.19; 0.26] | 0.16 | [0.15; 0.19] | 0.00017100 | 0.831 | [0.717; 0.923] | 0.967 | 0.567 | 0.690 | 0.944 |
| s_ratio_to_all_6__ep_16  | 0.22 | [0.19; 0.26] | 0.17 | [0.15; 0.19] | 0.00018603 | 0.831 | [0.719; 0.926] | 0.733 | 0.833 | 0.815 | 0.758 |
| s_ratio_to_all_23__ep_32 | 0.11 | [0.10; 0.14] | 0.09 | [0.08; 0.10] | 0.00035395 | 0.831 | [0.718; 0.923] | 0.800 | 0.767 | 0.774 | 0.793 |
| s_ratio_to_all_12__ep_32 | 0.11 | [0.10; 0.13] | 0.09 | [0.08; 0.10] | 0.00039034 | 0.830 | [0.717; 0.923] | 0.667 | 0.867 | 0.833 | 0.722 |
| s_ratio_to_all_7__ep_32  | 0.11 | [0.10; 0.12] | 0.08 | [0.08; 0.10] | 0.00068719 | 0.829 | [0.710; 0.928] | 0.900 | 0.733 | 0.771 | 0.880 |
| s_ratio_to_all_6__ep_32  | 0.12 | [0.10; 0.14] | 0.08 | [0.08; 0.09] | 0.00029502 | 0.827 | [0.712; 0.924] | 0.800 | 0.767 | 0.774 | 0.793 |
| s_ratio_to_all_3__ep_16  | 0.21 | [0.18; 0.24] | 0.16 | [0.14; 0.18] | 0.00014313 | 0.823 | [0.707; 0.919] | 0.633 | 0.933 | 0.905 | 0.718 |
| s_ratio_to_all_17__ep_32 | 0.12 | [0.10; 0.13] | 0.09 | [0.08; 0.10] | 0.00057304 | 0.820 | [0.704; 0.919] | 0.900 | 0.667 | 0.730 | 0.870 |
| fractal_bc_d_3__ep_32    | 1.11 | [1.06; 1.18] | 1.01 | [0.96; 1.06] | 0.00036927 | 0.817 | [0.702; 0.913] | 0.767 | 0.733 | 0.742 | 0.759 |
| s_ratio_to_all_18__ep_32 | 0.11 | [0.10; 0.15] | 0.09 | [0.08; 0.10] | 0.00037915 | 0.816 | [0.700; 0.912] | 0.833 | 0.700 | 0.735 | 0.808 |
| fractal_bc_d_8__ep_32    | 1.13 | [1.07; 1.18] | 1.03 | [0.98; 1.07] | 0.00051135 | 0.816 | [0.696; 0.919] | 0.667 | 0.933 | 0.909 | 0.737 |
| s_ratio_to_all_3__ep_8   | 0.36 | [0.34; 0.45] | 0.31 | [0.28; 0.34] | 0.00026422 | 0.814 | [0.699; 0.914] | 0.767 | 0.767 | 0.767 | 0.767 |
| s_ratio_to_all_11__ep_32 | 0.12 | [0.10; 0.13] | 0.09 | [0.08; 0.10] | 0.00017438 | 0.814 | [0.694; 0.917] | 0.767 | 0.800 | 0.793 | 0.774 |
| s_ratio_to_all_8__ep_8   | 0.35 | [0.31; 0.38] | 0.27 | [0.22; 0.30] | 0.00064242 | 0.811 | [0.689; 0.917] | 0.733 | 0.867 | 0.846 | 0.765 |
| s_ratio_to_all_9__ep_32  | 0.11 | [0.10; 0.12] | 0.09 | [0.08; 0.10] | 0.00039948 | 0.809 | [0.688; 0.911] | 0.767 | 0.767 | 0.767 | 0.767 |

|                          |      |              |      |              |            |       |                |       |       |       |       |
|--------------------------|------|--------------|------|--------------|------------|-------|----------------|-------|-------|-------|-------|
| surface_volume_r_1__orig | 3.49 | [3.11; 4.03] | 4.82 | [4.01; 5.39] | 0.00040076 | 0.807 | [0.689; 0.911] | 0.933 | 0.600 | 0.700 | 0.900 |
|--------------------------|------|--------------|------|--------------|------------|-------|----------------|-------|-------|-------|-------|

---

Data is presented as median with interquartile ranges or frequency and percentage of the most frequent element, as appropriate.

First-order statistical names are generated as: “statistic”\_“orig” indicating calculation done on original images.

GLCM statistical names are generated as: “statistic”\_“X”\_“ep”\_“N”\_“D”\_“avg”. X is either empty indicating no manipulation done on the GLCM matrix, or *s* for squared, where the GLCM element were squared or *e* where the entropy of the elements was used.

ep: equal probability binning. N: the number of bins used. D: the distance of the reference and the observed voxels. “avg” indicates that statistics were averaged using all directions.

GLRLM statistical names are generated as: “statistic”\_“ep”\_“N”\_“avg”. ep: equal probability binning. N: the number of bins used. “avg” indicates that statistics were averaged using all directions.

Geometry based statistical names were generated as: “statistic”\_“S”\_“ep”\_“N”. S: subcomponent used, 1 if original image was used. ep: equal probability binning. N: the number of bins used.

## Supplemental References

1. Karady J, Panajotu A, Kolossvary M, Szilveszter B, Jermendy AL, Bartykowszki A, Karolyi M, Celeng C, Merkely B and Maurovich-Horvat P. The effect of four-phasic versus three-phasic contrast media injection protocols on extravasation rate in coronary CT angiography: a randomized controlled trial. *Eur Radiol.* 2017;27:4538-4543.
2. Shafiq-Ul-Hassan M, Zhang GG, Latifi K, Ullah G, Hunt DC, Balagurunathan Y, Abdalah MA, Schabath MB, Goldgof DG, Mackin D, Court LE, Gillies RJ and Moros EG. Intrinsic dependencies of CT radiomic features on voxel size and number of gray levels. *Med Phys.* 2017;44:1050-1062.
3. Haralick RM, Shanmugam K and Dinstein I. Textural Features for Image Classification. *IEEE Transactions on Systems, Man, and Cybernetics.* 1973;SMC-3:610-621.
4. Galloway MM. Texture analysis using gray level run lengths. *Computer Graphics and Image Processing.* 1975;4:172-179.
